# Supplementary material for: Manganrockbridgeite, Mn2+2Fe3+3(PO4)3(OH)4(H2O), a new member of the rockbridgeite group, from the Hagendorf-Süd pegmatite, Oberpfalz, Bavaria
Source: Copernicus journal article supplement (doi:10.5194/ejm-35-295-2023), 2023-04-25

## checkCIF/PLATON report

You have not supplied any structure factors. As a result the full set of tests cannot be run.

THIS REPORT IS FOR GUIDANCE ONLY. IF USED AS PART OF A REVIEW PROCEDURE FOR PUBLICATION, IT SHOULD NOT REPLACE THE EXPERTISE OF AN EXPERIENCED CRYSTALLOGRAPHIC REFEREE.

No syntax errors found.      CIF dictionary      Interpreting this report

### Datablock: I

---

Bond precision:      P- O = 0.0133 A      Wavelength=0.71090

Cell:                      a=5.198 (4)              b=16.905 (6)              c=7.510 (12)  
                                alpha=90              beta=110.02 (3)              gamma=90

Temperature:              100 K

|                        | Calculated                                        | Reported                                                                      |
|------------------------|---------------------------------------------------|-------------------------------------------------------------------------------|
| Volume                 | 620.0 (11)                                        | 620.0 (11)                                                                    |
| Space group            | P 21/m                                            | P 1 21/m 1                                                                    |
| Hall group             | -P 2yb                                            | -P 2yb                                                                        |
| Moiety formula         | Fe <sub>9.48</sub> O <sub>34</sub> P <sub>6</sub> | ?                                                                             |
| Sum formula            | Fe <sub>9.48</sub> O <sub>34</sub> P <sub>6</sub> | O <sub>17</sub> H <sub>6</sub> P <sub>3</sub> Mn <sub>2</sub> Fe <sub>3</sub> |
| Mr                     | 1259.50                                           | 648.40                                                                        |
| Dx, g cm <sup>-3</sup> | 3.373                                             | 3.473                                                                         |
| Z                      | 1                                                 | 2                                                                             |
| Mu (mm <sup>-1</sup> ) | 5.914                                             | 5.902                                                                         |
| F000                   | 608.6                                             | 609.0                                                                         |
| F000'                  | 612.79                                            |                                                                               |
| h, k, lmax             | 7, 24, 11                                         | 5, 22, 10                                                                     |
| Nref                   | 2134                                              | 1069                                                                          |
| Tmin, Tmax             | 0.899, 0.971                                      | 0.519, 0.746                                                                  |
| Tmin'                  | 0.554                                             |                                                                               |

Correction method= # Reported T Limits: Tmin=0.519 Tmax=0.746  
AbsCorr = MULTI-SCAN

Data completeness= 0.501                      Theta (max)= 31.590

R(reflections)= 0.0759 ( 1008)                      wR2(reflections)=  
S = 3.060                      Npar= 57                      wR= 0.1032 ( 1069)

---

The following ALERTS were generated. Each ALERT has the format

**test-name\_ALERT\_alert-type\_alert-level.**

Click on the hyperlinks for more details of the test.

---

### Alert level A

ATOM007\_ALERT\_1\_A \_atom\_site\_aniso\_label is missing

Unique label identifying the atom site.

PLAT027\_ALERT\_3\_A \_diffrn\_refl\_theta\_full value (too) Low ..... 20.39 Degree

PLAT029\_ALERT\_3\_A \_diffrn\_measured\_fraction\_theta\_full value Low . 0.930 Why?

Fe1 Mn2 Fe3 P1 P2 etc.

---

### Alert level B

PLAT043\_ALERT\_1\_B Calculated and Reported Mol. Weight Differ by .. 37.30 Check

---

### Alert level C

ABSTY02\_ALERT\_1\_C An \_exptl\_absorpt\_correction\_type has been given without  
a literature citation. This should be contained in the  
\_exptl\_absorpt\_process\_details field.

Absorption correction given as multi-scan

GOODF01\_ALERT\_2\_C The least squares goodness of fit parameter lies  
outside the range 0.80 <> 2.00

Goodness of fit given = 3.060

PLAT041\_ALERT\_1\_C Calc. and Reported SumFormula Strings Differ Please Check

PLAT077\_ALERT\_4\_C Unitcell Contains Non-integer Number of Atoms .. Please Check

PLAT148\_ALERT\_3\_C s.u. on the c - Axis is (Too) Large .... 0.012 Ang.

PLAT799\_ALERT\_4\_C Numeric Label on Displacement Par. Record ..... ? Check

---

### Alert level G

FORMU01\_ALERT\_2\_G There is a discrepancy between the atom counts in the  
\_chemical\_formula\_sum and the formula from the \_atom\_site\* data.

Atom count from \_chemical\_formula\_sum: H6 Fe3 Mn2 O17 P3

Atom count from the \_atom\_site data: Fe4.742 O17 P3

ABSMU01\_ALERT\_1\_G Calculation of \_exptl\_absorpt\_correction\_mu  
not performed for this radiation type.

CELLZ01\_ALERT\_1\_G Difference between formula and atom\_site contents detected.

CELLZ01\_ALERT\_1\_G ALERT: Large difference may be due to a  
symmetry error - see SYMMG tests

From the CIF: \_cell\_formula\_units\_Z 2

From the CIF: \_chemical\_formula\_sum O17 H6 P3 Mn2 Fe3

TEST: Compare cell contents of formula and atom\_site data

| atom | Z*formula | cif sites | diff  |
|------|-----------|-----------|-------|
| O    | 34.00     | 34.00     | 0.00  |
| H    | 12.00     | 0.00      | 12.00 |
| P    | 6.00      | 6.00      | 0.00  |
| Mn   | 4.00      | 0.00      | 4.00  |
| Fe   | 6.00      | 9.48      | -3.48 |

PLAT004\_ALERT\_5\_G Polymeric Structure Found with Maximum Dimension 3 Info

PLAT005\_ALERT\_5\_G No Embedded Refinement Details Found in the CIF Please Do !

PLAT017\_ALERT\_1\_G Check Scattering Type Consistency of MN2 as FE

PLAT045\_ALERT\_1\_G Calculated and Reported Z Differ by a Factor ... 0.500 Check

|                   |                                                  |              |
|-------------------|--------------------------------------------------|--------------|
| PLAT068_ALERT_1_G | Reported F000 Differs from Calcd (or Missing)... | Please Check |
| PLAT301_ALERT_3_G | Main Residue Disorder .....(Resd 1 )             | 14% Note     |
| PLAT720_ALERT_4_G | Number of Unusual/Non-Standard Labels .....      | 1 Note       |
| PLAT794_ALERT_5_G | Tentative Bond Valency for Fe3 (III) .           | 2.95 Info    |
| PLAT808_ALERT_5_G | No Parseable SHELXL Style Weighting Scheme Found | Please Check |
| PLAT883_ALERT_1_G | No Info/Value for _atom_sites_solution_primary . | Please Do !  |
| PLAT950_ALERT_5_G | Calculated (ThMax) and CIF-Reported Hmax Differ  | 2 Units      |
| PLAT951_ALERT_5_G | Calculated (ThMax) and CIF-Reported Kmax Differ  | 2 Units      |
| PLAT966_ALERT_5_G | Note: Non-Standard (i.e. 2.0) OMIT Threshold of  | 3.0 Sig(I)   |

- 
- 3 **ALERT level A** = Most likely a serious problem - resolve or explain  
 1 **ALERT level B** = A potentially serious problem, consider carefully  
 6 **ALERT level C** = Check. Ensure it is not caused by an omission or oversight  
 17 **ALERT level G** = General information/check it is not something unexpected
- 11 ALERT type 1 CIF construction/syntax error, inconsistent or missing data  
 2 ALERT type 2 Indicator that the structure model may be wrong or deficient  
 4 ALERT type 3 Indicator that the structure quality may be low  
 3 ALERT type 4 Improvement, methodology, query or suggestion  
 7 ALERT type 5 Informative message, check
- 

It is advisable to attempt to resolve as many as possible of the alerts in all categories. Often the minor alerts point to easily fixed oversights, errors and omissions in your CIF or refinement strategy, so attention to these fine details can be worthwhile. In order to resolve some of the more serious problems it may be necessary to carry out additional measurements or structure refinements. However, the purpose of your study may justify the reported deviations and the more serious of these should normally be commented upon in the discussion or experimental section of a paper or in the "special\_details" fields of the CIF. checkCIF was carefully designed to identify outliers and unusual parameters, but every test has its limitations and alerts that are not important in a particular case may appear. Conversely, the absence of alerts does not guarantee there are no aspects of the results needing attention. It is up to the individual to critically assess their own results and, if necessary, seek expert advice.

### Publication of your CIF in IUCr journals

A basic structural check has been run on your CIF. These basic checks will be run on all CIFs submitted for publication in IUCr journals (*Acta Crystallographica*, *Journal of Applied Crystallography*, *Journal of Synchrotron Radiation*); however, if you intend to submit to *Acta Crystallographica Section C* or *E* or *IUCrData*, you should make sure that full publication checks are run on the final version of your CIF prior to submission.

### Publication of your CIF in other journals

Please refer to the *Notes for Authors* of the relevant journal for any special instructions relating to CIF submission.

### Validation response form

Please find below a validation response form (VRF) that can be filled in and pasted into your CIF.

```
# start Validation Reply Form
_vrf_ATOM007_I
;
PROBLEM: _atom_site_aniso_label is missing
RESPONSE: ...
;
_vrf_PLAT027_I
;
PROBLEM: _diffrn_reflns_theta_full value (too) Low ..... 20.39 Degree
RESPONSE: ...
;
_vrf_PLAT029_I
;
PROBLEM: _diffrn_measured_fraction_theta_full value Low . 0.930 Why?
RESPONSE: ...
;
_vrf_PLAT043_I
;
PROBLEM: Calculated and Reported Mol. Weight Differ by .. 37.30 Check
RESPONSE: ...
;
# end Validation Reply Form
```

---

**PLATON version of 28/11/2022; check.def file version of 28/11/2022**

Datablock I - ellipsoid plot

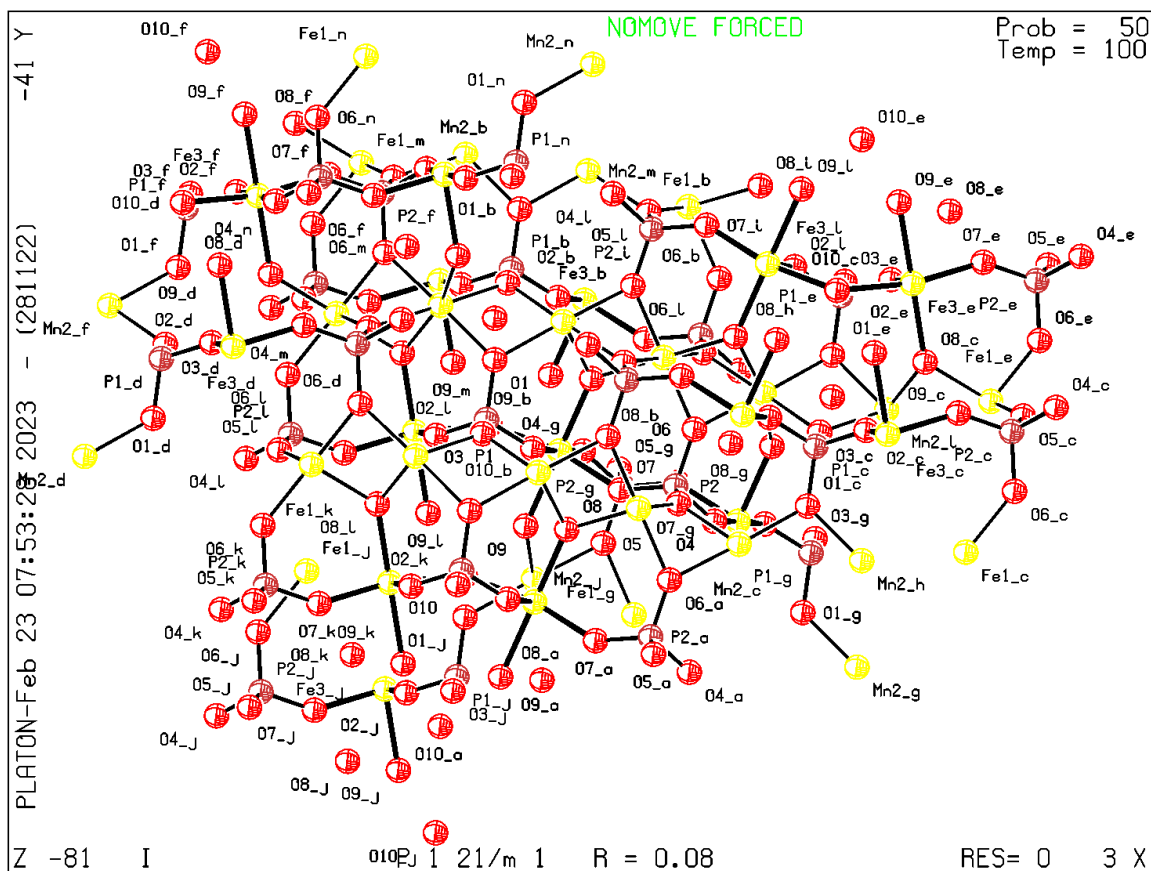

Supplement: Supplementary file 1 [file ejm-35-295-2023-supplement.zip › checkcif_SR.pdf]
