# Supplementary material for: Manganrockbridgeite, Mn2+2Fe3+3(PO4)3(OH)4(H2O), a new member of the rockbridgeite group, from the Hagendorf-Süd pegmatite, Oberpfalz, Bavaria
Source: Copernicus journal article supplement (doi:10.5194/ejm-35-295-2023), 2023-04-25
Supplement: Supplementary file 1 [file ejm-35-295-2023-supplement.zip]

Archive with 5 entries (5 files):
- checkcif_SR.pdf
- Hag510_SR_AKcoords.cif
- AK_SC_10feba.cif
- checkcif_Rigaku.pdf
- ejm-35-295-2023-supplement-title-page.pdf
