# Supplementary material for: Manganrockbridgeite, Mn2+2Fe3+3(PO4)3(OH)4(H2O), a new member of the rockbridgeite group, from the Hagendorf-Süd pegmatite, Oberpfalz, Bavaria
Source: Copernicus journal article supplement (doi:10.5194/ejm-35-295-2023), 2023-04-25
Supplement: Supplementary file 1 [file ejm-35-295-2023-supplement.zip › AK_SC_10feba.cif]

#=======================================================================
data_global
#=======================================================================

_audit_creation_method                   'Jana2006 Version : 25/03/2021'


# 1. PROCESSING SUMMARY (IUCr Office Use Only)

_journal_date_recd_electronic            ?
_journal_date_to_coeditor                ?
_journal_date_from_coeditor              ?
_journal_date_accepted                   ?
_journal_date_printers_first             ?
_journal_date_printers_final             ?
_journal_date_proofs_out                 ?
_journal_date_proofs_in                  ?
_journal_coeditor_name                   ?
_journal_coeditor_code                   ?
_journal_coeditor_notes
; ?
;
_journal_techeditor_code                 ?
_journal_paper_category                  ?
_journal_techeditor_notes
; ?
;
_journal_coden_ASTM                      ?
_journal_name_full                       'Acta Crystallographica Section C'
_journal_year                            ?
_journal_volume                          ?
_journal_issue                           ?
_journal_page_first                      ?
_journal_page_last                       ?
_journal_suppl_publ_number               ?
_journal_suppl_publ_pages                ?

#=======================================================================

# 2. SUBMISSION DETAILS

_publ_contact_author_name                ?
_publ_contact_author_address
; ?
;
_publ_contact_author_email               ?
_publ_contact_author_fax                 ?
_publ_contact_author_phone               ?

_publ_requested_journal                  'Acta Crystallographica Section C'
_publ_requested_category                 ?

_publ_contact_letter
; ?
;

#=======================================================================

# 3. TITLE AND AUTHOR LIST

_publ_section_title
; ?
;
_publ_section_title_footnote
; ?
;
loop_
 _publ_author_name
 _publ_author_footnote
 _publ_author_address
; ?      # name
;
; ?      # footnote
;
; ?      # address
;

#=======================================================================

# 4. TEXT

_publ_section_synopsis
; ?
;
_publ_section_abstract
; ?
;
_publ_section_comment
; ?
;
_publ_section_introduction
; ?
;
_publ_section_experimental
; ?
;
_publ_section_exptl_prep
; ?
;
_publ_section_exptl_refinement
; ?
;
_publ_section_exptl_solution
; ?
;
_publ_section_discussion
; ?
;
_publ_section_acknowledgements
; ?
;
_publ_section_references
;
Petricek, V., Dusek, M. & Palatinus L. (2014). Z. Kristallogr. 229(5), 345-352.

Palatinus L. & Chapuis G. (2007). J. Appl. Cryst. 40, 786-790.

# enable this reference if Diamond ver. 2 was used for visualization
#Brandenburg, K. (1999). DIAMOND. Version. 2.1c.
#Crystal Impact GbR, Bonn, Germany.

# enable this reference if Diamond ver. 3 was used for visualization
#Brandenburg, K. & Putz, H. (2005). DIAMOND Version 3.
#Crystal Impact GbR, Postfach 1251, D-53002 Bonn, Germany.

# enable this reference if SIR97 was used for solving of the structure
#Altomare, A., Burla, M. C., Camalli, M., Cascarano, G., Giacovazzo, C.,
#Guagliardi, A., Moliterni, A. G. G., Polidori, G., Spagna, R. (1997).
#SIR97. A Package for Crystal Structure Solution by Direct Methods
#and Refinement, Bari, Rome, Italy.

# use this reference if SIR2002 was used for solving of the structure
#Burla, M.C., Camalli, M., Carrozzini, B., Cascarano, G., Giacovazzo, C.,
#Polidori, G., Spagna, R.
#SIR2002: the program, J. Appl. Cryst, (2003). 36, 1103


# use this reference if SIR2011 was used for solving of the structure
#Burla, M.C., Caliandro, R., Camalli, M., Carrozzini, B., Cascarano,
#G.L., Giacovazzo, C., Mallamo. M., Mazzone, A., Polidori, G., Spagna, R.
#SIR2011: a new package for crystal structure determination and refinement,
#J.Appl.Cryst. (2012) 45, 357-361

# enable this reference if bond valences were calculated
#Brown, I. D. (1996). J. Appl. Cryst. 29, 479-480.

# enable this reference if Xshape wase used for crystal shape refinement
#Stoe & Cie (1998). X-SHAPE. Stoe & Cie, Darmstadt, Germany.


# enable this reference if Flack coefficient was refined
#Flack, H. D. (1983). Acta Cryst. A39, 876-881.
;
_publ_section_figure_captions
; ?
;
_publ_section_table_legends
; ?
;

#=======================================================================
data_I
#=======================================================================

# 5. CHEMICAL DATA

_chemical_name_systematic
; ?
;
_chemical_name_common                    ?
_chemical_formula_moiety                 ?
_chemical_formula_structural             ?
_chemical_formula_analytical             ?
_chemical_formula_iupac                  ?
_chemical_formula_sum                    'Fe3 H6 Mn2 O17 P3'
_chemical_formula_weight                 648.4
_chemical_melting_point                  ?
_chemical_compound_source                ?
_chemical_absolute_configuration         .

#=======================================================================

# 6. CRYSTAL DATA

_symmetry_cell_setting                   monoclinic
_symmetry_space_group_name_H-M           'P 1 21/m 1'
_symmetry_space_group_name_Hall          '-P 2yb'
_symmetry_Int_Tables_number              11

loop_
 _space_group_symop_id
 _space_group_symop_operation_xyz
 1   x,y,z
 2   -x,y+1/2,-z
 3   -x,-y,-z
 4   x,-y+1/2,z

_cell_length_a                           5.198(2)
_cell_length_b                           16.944(5)
_cell_length_c                           7.451(3)
_cell_angle_alpha                        90
_cell_angle_beta                         110.170(9)
_cell_angle_gamma                        90
_cell_volume                             616.0(4)

loop_
 _twin_individual_id
 _twin_individual_mass_fraction_refined
 _twin_individual_twin_matrix_11
 _twin_individual_twin_matrix_12
 _twin_individual_twin_matrix_13
 _twin_individual_twin_matrix_21
 _twin_individual_twin_matrix_22
 _twin_individual_twin_matrix_23
 _twin_individual_twin_matrix_31
 _twin_individual_twin_matrix_32
 _twin_individual_twin_matrix_33
1 0.638(5)
1 0 0
0 1 0
0 0 1
2 0.362(5)
-1 0 0.9885
0 -1 0
0 0 1

_cell_formula_units_Z                    2

_cell_measurement_reflns_used            1690
_cell_measurement_theta_min              4.2
_cell_measurement_theta_max              20.8
_cell_measurement_temperature            293
_cell_special_details
; ?
;

_exptl_crystal_density_diffrn            3.4956
_exptl_crystal_density_meas              ?
_exptl_crystal_density_method            ?
_exptl_crystal_F_000                     603

_exptl_absorpt_coefficient_mu            5.94
_exptl_crystal_description               'blade'
_exptl_crystal_size_max                  0.08
_exptl_crystal_size_mid                  0.01
_exptl_crystal_size_min                  0.01
_exptl_crystal_size_rad                  ?
_exptl_crystal_colour                    'brown'
_exptl_absorpt_correction_type           'multi-scan'
_exptl_absorpt_process_details           ?
_exptl_absorpt_correction_T_min          0.554
_exptl_absorpt_correction_T_max          1.000
loop_
 _exptl_crystal_face_index_h
 _exptl_crystal_face_index_k
 _exptl_crystal_face_index_l
 _exptl_crystal_face_perp_dist
 ? ? ? ?

#=======================================================================

# 7. EXPERIMENTAL DATA

_exptl_special_details                   ?

_diffrn_ambient_temperature              293
_diffrn_source                           ?
_diffrn_source_power                     ?
_diffrn_source_voltage                   ?
_diffrn_source_current                   ?
_diffrn_radiation_type                   'Mo K\a'
_diffrn_radiation_source                 'X-ray tube'
_diffrn_radiation_wavelength             0.71075
_diffrn_radiation_monochromator          'graphite'
_diffrn_measurement_device               ?
_diffrn_measurement_device_type          'Rigaku R-AXIS diffractometer'
_diffrn_detector                         'RX'
_diffrn_detector_area_resol_mean         ?
_diffrn_measurement_method               ?
_diffrn_measurement_specimen_support     'loop'

_diffrn_reflns_number                    2799
_diffrn_reflns_theta_min                 3.09
_diffrn_reflns_theta_max                 20.63
_diffrn_reflns_theta_full                18.64
_diffrn_measured_fraction_theta_max      0.86
_diffrn_measured_fraction_theta_full     0.98
_diffrn_reflns_av_R_equivalents          0.143
_diffrn_reflns_av_unetI/netI             0.0948
_diffrn_reflns_limit_h_min               -5
_diffrn_reflns_limit_h_max               4
_diffrn_reflns_limit_k_min               -16
_diffrn_reflns_limit_k_max               16
_diffrn_reflns_limit_l_min               -7
_diffrn_reflns_limit_l_max               7
_diffrn_reflns_reduction_process         ?

_diffrn_standards_number                 ?
_diffrn_standards_interval_count         ?
_diffrn_standards_interval_time          ?
_diffrn_standards_decay_%                ?
loop_
_diffrn_standard_refln_index_h
_diffrn_standard_refln_index_k
_diffrn_standard_refln_index_l
  ? ? ?

_diffrn_radiation_probe                  X-ray

#=======================================================================

# 8. REFINEMENT DATA

_refine_special_details
; ?
;

_reflns_number_total                     668
_reflns_number_gt                        431
_reflns_threshold_expression             'I>3\s(I)'

_refine_ls_structure_factor_coef         F
_refine_ls_R_factor_gt                   0.0649
_refine_ls_wR_factor_gt                  0.0610
_refine_ls_R_factor_all                  0.1112
_refine_ls_wR_factor_ref                 0.0681
_refine_ls_goodness_of_fit_ref           1.56
_refine_ls_goodness_of_fit_gt            1.78
_refine_ls_restrained_S_gt               ?
_refine_ls_restrained_S_all              ?
_refine_ls_number_reflns                 668
_refine_ls_number_parameters             65
_refine_ls_number_restraints             0
_refine_ls_number_constraints            0
_refine_ls_weighting_scheme              sigma
_refine_ls_weighting_details             'w=1/(\s^2^(F)+0.0001F^2^)'
_refine_ls_hydrogen_treatment            'constr'
_refine_ls_shift/su_max                  0.0460
_refine_ls_shift/su_mean                 0.0044
_refine_diff_density_max                 1.17
_refine_diff_density_min                 -1.16
_refine_ls_extinction_method             'none'
_refine_ls_extinction_coef               ?
_refine_ls_extinction_expression         ?
_refine_ls_abs_structure_details         ?
_refine_ls_abs_structure_Flack           ?
_refine_ls_abs_structure_Rogers          ?

loop_
 _atom_type_symbol
 _atom_type_scat_dispersion_real
 _atom_type_scat_dispersion_imag
 _atom_type_scat_source
 Fe   0.3463  0.8444
 'International Tables Vol C tables 4.2.6.8 and 6.1.1.1'
 H    0.0000  0.0000
 'International Tables Vol C tables 4.2.6.8 and 6.1.1.1'
 Mn   0.3368  0.7283
 'International Tables Vol C tables 4.2.6.8 and 6.1.1.1'
 O    0.0106  0.0060
 'International Tables Vol C tables 4.2.6.8 and 6.1.1.1'
 P    0.1023  0.0942
 'International Tables Vol C tables 4.2.6.8 and 6.1.1.1'

_computing_data_collection               ?
_computing_cell_refinement               ?
_computing_data_reduction                ?
_computing_structure_solution            ?
_computing_structure_refinement          ?
_computing_molecular_graphics            ?
_computing_publication_material          ?

loop_
 _restr_distance_atom_site_label_1
 _restr_distance_site_symmetry_1
 _restr_distance_atom_site_label_2
 _restr_distance_site_symmetry_2
 _restr_distance_target
 _restr_distance_target_weight_param
 ? ? ? ? ? ?

loop_
 _restr_angle_atom_site_label_1
 _restr_angle_site_symmetry_1
 _restr_angle_atom_site_label_2
 _restr_angle_site_symmetry_2
 _restr_angle_atom_site_label_3
 _restr_angle_site_symmetry_3
 _restr_angle_target
 _restr_angle_target_weight_param
 ? ? ? ? ? ? ? ?

loop_
 _restr_torsion_atom_site_label_1
 _restr_torsion_site_symmetry_1
 _restr_torsion_atom_site_label_2
 _restr_torsion_site_symmetry_2
 _restr_torsion_atom_site_label_3
 _restr_torsion_site_symmetry_3
 _restr_torsion_atom_site_label_4
 _restr_torsion_site_symmetry_4
 _restr_torsion_angle_target
 _restr_torsion_weight_param
 ? ? ? ? ? ? ? ? ? ?

loop_
 _restr_equal_distance_atom_site_label_1
 _restr_equal_distance_site_symmetry_1
 _restr_equal_distance_atom_site_label_2
 _restr_equal_distance_site_symmetry_2
 _restr_equal_distance_class_class_id
 _restr_equal_distance_class_target_weight_param
 ? ? ? ? ? ?

loop_
 _restr_equal_angle_atom_site_label_1
 _restr_equal_angle_site_symmetry_1
 _restr_equal_angle_atom_site_label_2
 _restr_equal_angle_site_symmetry_2
 _restr_equal_angle_atom_site_label_3
 _restr_equal_angle_site_symmetry_3
 _restr_equal_angle_class_class_id
 _restr_equal_angle_class_target_weight_param
 ? ? ? ? ? ? ? ?

loop_
 _restr_equal_torsion_atom_site_label_1
 _restr_equal_torsion_site_symmetry_1
 _restr_equal_torsion_atom_site_label_2
 _restr_equal_torsion_site_symmetry_2
 _restr_equal_torsion_atom_site_label_3
 _restr_equal_torsion_site_symmetry_3
 _restr_equal_torsion_atom_site_label_4
 _restr_equal_torsion_site_symmetry_4
 _restr_equal_torsion_class_class_id
 _restr_equal_torsion_class_target_weight_param
 ? ? ? ? ? ? ? ? ? ?


#=======================================================================

# 9. ATOMIC COORDINATES AND DISPLACEMENT PARAMETERS

loop_
 _atom_site_label
 _atom_site_type_symbol
 _atom_site_fract_x
 _atom_site_fract_y
 _atom_site_fract_z
 _atom_site_adp_type
 _atom_site_U_iso_or_equiv
 _atom_site_site_symmetry_multiplicity
 _atom_site_occupancy
 _atom_site_calc_flag
 _atom_site_refinement_flags
 _atom_site_disorder_assembly
 _atom_site_disorder_group
  Fe1 Fe 1 0.5 0.5 Uiso 0.023(2) 2 0.937(16) d . . .
  Mn2 Mn 1.0500(11) 0.84358(17) 0.6383(6) Uiso 0.0248(16) 4 0.926(13) d . . .
  Fe3a Fe 0.080(9) 0.637(2) 0.146(6) Uiso 0.0217(14) 4 0.084(6) d . . .
  Fe3b Fe 0.5493(9) 0.6390(2) 0.1435(7) Uiso 0.0217(14) 4 0.871(13) d . . .
  P1 P 0.467(2) 0.75 0.4670(12) Uiso 0.023(2) 2 1 d . . .
  P2 P 0.3700(16) 0.4561(3) 0.2137(8) Uiso 0.0240(17) 4 1 d . . .
  O1 O 0.770(6) 0.75 0.600(4) Uiso 0.037(7) 2 1 d . . .
  O2 O 0.404(4) 0.6756(7) 0.344(2) Uiso 0.022(4) 4 1 d . . .
  O3 O 0.282(6) 0.75 0.589(4) Uiso 0.045(8) 2 1 d . . .
  O4 O 0.290(4) 0.3928(7) 0.0553(18) Uiso 0.022(4) 4 1 d . . .
  O5 O 0.181(4) 0.4437(8) 0.332(2) Uiso 0.029(5) 4 1 d . . .
  O6 O 0.679(4) 0.4402(8) 0.342(2) Uiso 0.024(5) 4 1 d . . .
  O7 O 0.349(3) 0.5398(7) 0.139(2) Uiso 0.024(4) 4 1 d . . .
  O8 O -0.081(4) 0.6046(7) 0.346(2) Uiso 0.030(4) 4 1 d . . .
  O9 O 0.184(4) 0.6753(7) -0.062(2) Uiso 0.026(4) 4 1 d . . .
  O10b O -0.322(6) 0.75 0.116(4) Uiso 0.023(7) 2 0.84(4) d . . .
  O10a O -0.13(3) 0.75 0.13(2) Uiso 0.023(7) 2 0.16(4) d . . .

loop_
 _atom_site_aniso_label
 _atom_site_aniso_type_symbol
 _atom_site_aniso_U_11
 _atom_site_aniso_U_22
 _atom_site_aniso_U_33
 _atom_site_aniso_U_12
 _atom_site_aniso_U_13
 _atom_site_aniso_U_23
 ? ? ? ? ? ? ? ?

loop_
 _jana_atom_site_ADP_C_label
 _jana_atom_site_ADP_C_type_symbol
 _jana_atom_site_ADP_C_111
 _jana_atom_site_ADP_C_112
 _jana_atom_site_ADP_C_113
 _jana_atom_site_ADP_C_122
 _jana_atom_site_ADP_C_123
 _jana_atom_site_ADP_C_133
 _jana_atom_site_ADP_C_222
 _jana_atom_site_ADP_C_223
 _jana_atom_site_ADP_C_233
 _jana_atom_site_ADP_C_333
 ? ? ? ? ? ? ? ? ? ? ? ?

loop_
 _jana_atom_site_ADP_D_label
 _jana_atom_site_ADP_D_type_symbol
 _jana_atom_site_ADP_D_1111
 _jana_atom_site_ADP_D_1112
 _jana_atom_site_ADP_D_1113
 _jana_atom_site_ADP_D_1122
 _jana_atom_site_ADP_D_1123
 _jana_atom_site_ADP_D_1133
 _jana_atom_site_ADP_D_1222
 _jana_atom_site_ADP_D_1223
 _jana_atom_site_ADP_D_1233
 _jana_atom_site_ADP_D_1333
 _jana_atom_site_ADP_D_2222
 _jana_atom_site_ADP_D_2223
 _jana_atom_site_ADP_D_2233
 _jana_atom_site_ADP_D_2333
 _jana_atom_site_ADP_D_3333
 ? ? ? ? ? ? ? ? ? ? ? ? ? ? ? ? ?

loop_
 _jana_atom_site_ADP_E_label
 _jana_atom_site_ADP_E_type_symbol
 _jana_atom_site_ADP_E_11111
 _jana_atom_site_ADP_E_11112
 _jana_atom_site_ADP_E_11113
 _jana_atom_site_ADP_E_11122
 _jana_atom_site_ADP_E_11123
 _jana_atom_site_ADP_E_11133
 _jana_atom_site_ADP_E_11222
 _jana_atom_site_ADP_E_11223
 _jana_atom_site_ADP_E_11233
 _jana_atom_site_ADP_E_11333
 _jana_atom_site_ADP_E_12222
 _jana_atom_site_ADP_E_12223
 _jana_atom_site_ADP_E_12233
 _jana_atom_site_ADP_E_12333
 _jana_atom_site_ADP_E_13333
 _jana_atom_site_ADP_E_22222
 _jana_atom_site_ADP_E_22223
 _jana_atom_site_ADP_E_22233
 _jana_atom_site_ADP_E_22333
 _jana_atom_site_ADP_E_23333
 _jana_atom_site_ADP_E_33333
 ? ? ? ? ? ? ? ? ? ? ? ? ? ? ? ? ? ? ? ? ? ? ?

loop_
 _jana_atom_site_ADP_F_label
 _jana_atom_site_ADP_F_type_symbol
 _jana_atom_site_ADP_F_111111
 _jana_atom_site_ADP_F_111112
 _jana_atom_site_ADP_F_111113
 _jana_atom_site_ADP_F_111122
 _jana_atom_site_ADP_F_111123
 _jana_atom_site_ADP_F_111133
 _jana_atom_site_ADP_F_111222
 _jana_atom_site_ADP_F_111223
 _jana_atom_site_ADP_F_111233
 _jana_atom_site_ADP_F_111333
 _jana_atom_site_ADP_F_112222
 _jana_atom_site_ADP_F_112223
 _jana_atom_site_ADP_F_112233
 _jana_atom_site_ADP_F_112333
 _jana_atom_site_ADP_F_113333
 _jana_atom_site_ADP_F_122222
 _jana_atom_site_ADP_F_122223
 _jana_atom_site_ADP_F_122233
 _jana_atom_site_ADP_F_122333
 _jana_atom_site_ADP_F_123333
 _jana_atom_site_ADP_F_133333
 _jana_atom_site_ADP_F_222222
 _jana_atom_site_ADP_F_222223
 _jana_atom_site_ADP_F_222233
 _jana_atom_site_ADP_F_222333
 _jana_atom_site_ADP_F_223333
 _jana_atom_site_ADP_F_233333
 _jana_atom_site_ADP_F_333333
 ? ? ? ? ? ? ? ? ? ? ? ? ? ? ? ? ? ? ? ? ? ? ? ? ? ? ? ? ? ?


#=======================================================================

# 10. MOLECULAR GEOMETRY


loop_
 _geom_bond_atom_site_label_1
 _geom_bond_atom_site_label_2
 _geom_bond_site_symmetry_1
 _geom_bond_site_symmetry_2
 _geom_bond_distance
 _geom_bond_publ_flag
  Fe1 Mn2 . 2_746 2.823(3) ?
  Fe1 Mn2 . 4_565 2.823(3) ?
  Fe1 Fe3a . 1_655 3.64(5) ?
  Fe1 Fe3a . 3_666 3.64(5) ?
  Fe1 Fe3b . . 3.715(4) ?
  Fe1 Fe3b . 3_766 3.715(4) ?
  Fe1 P2 . . 3.318(7) ?
  Fe1 P2 . 1_655 3.411(8) ?
  Fe1 P2 . 3_666 3.411(8) ?
  Fe1 P2 . 3_766 3.318(7) ?
  Fe1 O5 . 1_655 2.04(2) ?
  Fe1 O5 . 3_666 2.04(2) ?
  Fe1 O6 . . 1.962(15) ?
  Fe1 O6 . 3_766 1.962(15) ?
  Fe1 O8 . 1_655 2.077(12) ?
  Fe1 O8 . 3_666 2.077(12) ?
  Mn2 Mn2 . 4_565 3.171(5) ?
  Mn2 Fe3a . 4_665 3.74(5) ?
  Mn2 Fe3a . 4_666 3.75(5) ?
  Mn2 Fe3b . 4_565 3.720(7) ?
  Mn2 Fe3b . 4_666 3.776(7) ?
  Mn2 P1 . . 3.266(11) ?
  Mn2 P1 . 1_655 3.277(12) ?
  Mn2 P2 . 2_656 3.358(9) ?
  Mn2 P2 . 2_756 3.412(9) ?
  Mn2 O1 . . 2.103(19) ?
  Mn2 O3 . 1_655 2.10(2) ?
  Mn2 O5 . 2_656 2.133(17) ?
  Mn2 O6 . 2_756 2.132(17) ?
  Mn2 O8 . 4_665 2.229(15) ?
  Mn2 O9 . 4_666 2.125(15) ?
  Fe3a Fe3b . 1_455 2.75(5) ?
  Fe3a Fe3b . . 2.45(5) ?
  Fe3a P1 . . 3.18(4) ?
  Fe3a P2 . . 3.38(4) ?
  Fe3a P2 . 3_565 3.29(4) ?
  Fe3a O2 . . 1.93(4) ?
  Fe3a O4 . 3_565 2.05(4) ?
  Fe3a O7 . . 2.17(5) ?
  Fe3a O8 . . 2.01(6) ?
  Fe3a O9 . . 1.92(5) ?
  Fe3a O10b . . 2.79(5) ?
  Fe3a O10a . . 2.18(8) ?
  Fe3b Fe3b . 4_565 3.762(6) ?
  Fe3b P1 . . 3.201(10) ?
  Fe3b P2 . . 3.329(7) ?
  Fe3b P2 . 3_665 3.260(9) ?
  Fe3b O2 . . 1.987(19) ?
  Fe3b O4 . 3_665 2.008(18) ?
  Fe3b O7 . . 1.970(14) ?
  Fe3b O8 . 1_655 2.074(16) ?
  Fe3b O9 . . 2.079(15) ?
  Fe3b O10b . 1_655 2.029(14) ?
  Fe3b O10a . 1_655 2.55(11) ?
  P1 O1 . . 1.55(3) ?
  P1 O2 . . 1.528(13) ?
  P1 O2 . 4_565 1.528(13) ?
  P1 O3 . . 1.53(4) ?
  P2 O4 . . 1.542(13) ?
  P2 O5 . . 1.55(2) ?
  P2 O6 . . 1.581(18) ?
  P2 O7 . . 1.515(13) ?
  O10b O10a . . 0.99(16) ?

loop_
 _geom_angle_atom_site_label_1
 _geom_angle_atom_site_label_2
 _geom_angle_atom_site_label_3
 _geom_angle_site_symmetry_1
 _geom_angle_site_symmetry_2
 _geom_angle_site_symmetry_3
 _geom_angle
 _geom_angle_publ_flag
  Mn2 Fe1 Mn2 2_746 . 4_565 180 ?
  Mn2 Fe1 Fe3a 2_746 . 1_655 110.7(7) ?
  Mn2 Fe1 Fe3a 2_746 . 3_666 69.3(7) ?
  Mn2 Fe1 Fe3b 2_746 . . 112.22(10) ?
  Mn2 Fe1 Fe3b 2_746 . 3_766 67.78(10) ?
  Mn2 Fe1 P2 2_746 . . 66.95(14) ?
  Mn2 Fe1 P2 2_746 . 1_655 64.39(15) ?
  Mn2 Fe1 P2 2_746 . 3_666 115.61(15) ?
  Mn2 Fe1 P2 2_746 . 3_766 113.05(14) ?
  Mn2 Fe1 O5 2_746 . 1_655 48.8(5) ?
  Mn2 Fe1 O5 2_746 . 3_666 131.2(5) ?
  Mn2 Fe1 O6 2_746 . . 49.0(5) ?
  Mn2 Fe1 O6 2_746 . 3_766 131.0(5) ?
  Mn2 Fe1 O8 2_746 . 1_655 128.6(4) ?
  Mn2 Fe1 O8 2_746 . 3_666 51.4(4) ?
  Mn2 Fe1 Fe3a 4_565 . 1_655 69.3(7) ?
  Mn2 Fe1 Fe3a 4_565 . 3_666 110.7(7) ?
  Mn2 Fe1 Fe3b 4_565 . . 67.78(10) ?
  Mn2 Fe1 Fe3b 4_565 . 3_766 112.22(10) ?
  Mn2 Fe1 P2 4_565 . . 113.05(14) ?
  Mn2 Fe1 P2 4_565 . 1_655 115.61(15) ?
  Mn2 Fe1 P2 4_565 . 3_666 64.39(15) ?
  Mn2 Fe1 P2 4_565 . 3_766 66.95(14) ?
  Mn2 Fe1 O5 4_565 . 1_655 131.2(5) ?
  Mn2 Fe1 O5 4_565 . 3_666 48.8(5) ?
  Mn2 Fe1 O6 4_565 . . 131.0(5) ?
  Mn2 Fe1 O6 4_565 . 3_766 49.0(5) ?
  Mn2 Fe1 O8 4_565 . 1_655 51.4(4) ?
  Mn2 Fe1 O8 4_565 . 3_666 128.6(4) ?
  Fe3a Fe1 Fe3a 1_655 . 3_666 180 ?
  Fe3a Fe1 Fe3b 1_655 . . 43.9(7) ?
  Fe3a Fe1 Fe3b 1_655 . 3_766 136.1(7) ?
  Fe3a Fe1 P2 1_655 . . 90.6(6) ?
  Fe3a Fe1 P2 1_655 . 1_655 57.1(7) ?
  Fe3a Fe1 P2 1_655 . 3_666 122.9(7) ?
  Fe3a Fe1 P2 1_655 . 3_766 89.4(6) ?
  Fe3a Fe1 O5 1_655 . 1_655 70.3(8) ?
  Fe3a Fe1 O5 1_655 . 3_666 109.7(8) ?
  Fe3a Fe1 O6 1_655 . . 100.3(8) ?
  Fe3a Fe1 O6 1_655 . 3_766 79.7(8) ?
  Fe3a Fe1 O8 1_655 . 1_655 26.7(9) ?
  Fe3a Fe1 O8 1_655 . 3_666 153.3(9) ?
  Fe3a Fe1 Fe3b 3_666 . . 136.1(7) ?
  Fe3a Fe1 Fe3b 3_666 . 3_766 43.9(7) ?
  Fe3a Fe1 P2 3_666 . . 89.4(6) ?
  Fe3a Fe1 P2 3_666 . 1_655 122.9(7) ?
  Fe3a Fe1 P2 3_666 . 3_666 57.1(7) ?
  Fe3a Fe1 P2 3_666 . 3_766 90.6(6) ?
  Fe3a Fe1 O5 3_666 . 1_655 109.7(8) ?
  Fe3a Fe1 O5 3_666 . 3_666 70.3(8) ?
  Fe3a Fe1 O6 3_666 . . 79.7(8) ?
  Fe3a Fe1 O6 3_666 . 3_766 100.3(8) ?
  Fe3a Fe1 O8 3_666 . 1_655 153.3(9) ?
  Fe3a Fe1 O8 3_666 . 3_666 26.7(9) ?
  Fe3b Fe1 Fe3b . . 3_766 180 ?
  Fe3b Fe1 P2 . . . 56.17(11) ?
  Fe3b Fe1 P2 . . 1_655 92.50(13) ?
  Fe3b Fe1 P2 . . 3_666 87.50(13) ?
  Fe3b Fe1 P2 . . 3_766 123.83(11) ?
  Fe3b Fe1 O5 . . 1_655 99.7(4) ?
  Fe3b Fe1 O5 . . 3_666 80.3(4) ?
  Fe3b Fe1 O6 . . . 72.6(4) ?
  Fe3b Fe1 O6 . . 3_766 107.4(4) ?
  Fe3b Fe1 O8 . . 1_655 26.5(5) ?
  Fe3b Fe1 O8 . . 3_666 153.5(5) ?
  Fe3b Fe1 P2 3_766 . . 123.83(11) ?
  Fe3b Fe1 P2 3_766 . 1_655 87.50(13) ?
  Fe3b Fe1 P2 3_766 . 3_666 92.50(13) ?
  Fe3b Fe1 P2 3_766 . 3_766 56.17(11) ?
  Fe3b Fe1 O5 3_766 . 1_655 80.3(4) ?
  Fe3b Fe1 O5 3_766 . 3_666 99.7(4) ?
  Fe3b Fe1 O6 3_766 . . 107.4(4) ?
  Fe3b Fe1 O6 3_766 . 3_766 72.6(4) ?
  Fe3b Fe1 O8 3_766 . 1_655 153.5(5) ?
  Fe3b Fe1 O8 3_766 . 3_666 26.5(5) ?
  P2 Fe1 P2 . . 1_655 101.15(17) ?
  P2 Fe1 P2 . . 3_666 78.85(17) ?
  P2 Fe1 P2 . . 3_766 180 ?
  P2 Fe1 O5 . . 1_655 93.6(5) ?
  P2 Fe1 O5 . . 3_666 86.4(5) ?
  P2 Fe1 O6 . . . 18.3(4) ?
  P2 Fe1 O6 . . 3_766 161.7(4) ?
  P2 Fe1 O8 . . 1_655 82.4(5) ?
  P2 Fe1 O8 . . 3_666 97.6(5) ?
  P2 Fe1 P2 1_655 . 3_666 180 ?
  P2 Fe1 P2 1_655 . 3_766 78.85(17) ?
  P2 Fe1 O5 1_655 . 1_655 15.6(5) ?
  P2 Fe1 O5 1_655 . 3_666 164.4(5) ?
  P2 Fe1 O6 1_655 . . 93.3(6) ?
  P2 Fe1 O6 1_655 . 3_766 86.7(6) ?
  P2 Fe1 O8 1_655 . 1_655 83.7(6) ?
  P2 Fe1 O8 1_655 . 3_666 96.3(6) ?
  P2 Fe1 P2 3_666 . 3_766 101.15(17) ?
  P2 Fe1 O5 3_666 . 1_655 164.4(5) ?
  P2 Fe1 O5 3_666 . 3_666 15.6(5) ?
  P2 Fe1 O6 3_666 . . 86.7(6) ?
  P2 Fe1 O6 3_666 . 3_766 93.3(6) ?
  P2 Fe1 O8 3_666 . 1_655 96.3(6) ?
  P2 Fe1 O8 3_666 . 3_666 83.7(6) ?
  P2 Fe1 O5 3_766 . 1_655 86.4(5) ?
  P2 Fe1 O5 3_766 . 3_666 93.6(5) ?
  P2 Fe1 O6 3_766 . . 161.7(4) ?
  P2 Fe1 O6 3_766 . 3_766 18.3(4) ?
  P2 Fe1 O8 3_766 . 1_655 97.6(5) ?
  P2 Fe1 O8 3_766 . 3_666 82.4(5) ?
  O5 Fe1 O5 1_655 . 3_666 180 ?
  O5 Fe1 O6 1_655 . . 82.4(7) ?
  O5 Fe1 O6 1_655 . 3_766 97.6(7) ?
  O5 Fe1 O8 1_655 . 1_655 96.2(7) ?
  O5 Fe1 O8 1_655 . 3_666 83.8(7) ?
  O5 Fe1 O6 3_666 . . 97.6(7) ?
  O5 Fe1 O6 3_666 . 3_766 82.4(7) ?
  O5 Fe1 O8 3_666 . 1_655 83.8(7) ?
  O5 Fe1 O8 3_666 . 3_666 96.2(7) ?
  O6 Fe1 O6 . . 3_766 180 ?
  O6 Fe1 O8 . . 1_655 98.0(6) ?
  O6 Fe1 O8 . . 3_666 82.0(6) ?
  O6 Fe1 O8 3_766 . 1_655 82.0(6) ?
  O6 Fe1 O8 3_766 . 3_666 98.0(6) ?
  O8 Fe1 O8 1_655 . 3_666 180 ?
  Fe1 Mn2 Mn2 2_756 . 4_565 159.86(18) ?
  Fe1 Mn2 Fe3a 2_756 . 4_665 65.7(6) ?
  Fe1 Mn2 Fe3a 2_756 . 4_666 104.6(6) ?
  Fe1 Mn2 Fe3b 2_756 . 4_565 67.59(10) ?
  Fe1 Mn2 Fe3b 2_756 . 4_666 103.63(11) ?
  Fe1 Mn2 P1 2_756 . . 110.91(16) ?
  Fe1 Mn2 P1 2_756 . 1_655 107.6(2) ?
  Fe1 Mn2 P2 2_756 . 2_656 66.32(14) ?
  Fe1 Mn2 P2 2_756 . 2_756 63.48(12) ?
  Fe1 Mn2 O1 2_756 . . 133.3(6) ?
  Fe1 Mn2 O3 2_756 . 1_655 129.1(8) ?
  Fe1 Mn2 O5 2_756 . 2_656 46.1(5) ?
  Fe1 Mn2 O6 2_756 . 2_756 44.0(4) ?
  Fe1 Mn2 O8 2_756 . 4_665 46.7(3) ?
  Fe1 Mn2 O9 2_756 . 4_666 118.8(3) ?
  Mn2 Mn2 Fe3a 4_565 . 4_665 95.1(6) ?
  Mn2 Mn2 Fe3a 4_565 . 4_666 95.1(6) ?
  Mn2 Mn2 Fe3b 4_565 . 4_565 94.55(13) ?
  Mn2 Mn2 Fe3b 4_565 . 4_666 94.48(13) ?
  Mn2 Mn2 P1 4_565 . . 60.95(15) ?
  Mn2 Mn2 P1 4_565 . 1_655 61.07(17) ?
  Mn2 Mn2 P2 4_565 . 2_656 124.6(2) ?
  Mn2 Mn2 P2 4_565 . 2_756 124.0(2) ?
  Mn2 Mn2 O1 4_565 . . 41.1(6) ?
  Mn2 Mn2 O3 4_565 . 1_655 41.0(7) ?
  Mn2 Mn2 O5 4_565 . 2_656 142.7(6) ?
  Mn2 Mn2 O6 4_565 . 2_756 140.2(5) ?
  Mn2 Mn2 O8 4_565 . 4_665 113.2(3) ?
  Mn2 Mn2 O9 4_565 . 4_666 81.3(3) ?
  Fe3a Mn2 Fe3a 4_665 . 4_666 168.9(9) ?
  Fe3a Mn2 Fe3b 4_665 . 4_565 43.3(6) ?
  Fe3a Mn2 Fe3b 4_665 . 4_666 136.4(7) ?
  Fe3a Mn2 P1 4_665 . . 90.4(6) ?
  Fe3a Mn2 P1 4_665 . 1_655 53.5(6) ?
  Fe3a Mn2 P2 4_665 . 2_656 121.5(6) ?
  Fe3a Mn2 P2 4_665 . 2_756 86.4(6) ?
  Fe3a Mn2 O1 4_665 . . 101.1(10) ?
  Fe3a Mn2 O3 4_665 . 1_655 71.0(10) ?
  Fe3a Mn2 O5 4_665 . 2_656 104.2(8) ?
  Fe3a Mn2 O6 4_665 . 2_756 75.6(8) ?
  Fe3a Mn2 O8 4_665 . 4_665 26.7(8) ?
  Fe3a Mn2 O9 4_665 . 4_666 159.5(9) ?
  Fe3a Mn2 Fe3b 4_666 . 4_565 139.9(7) ?
  Fe3a Mn2 Fe3b 4_666 . 4_666 38.0(7) ?
  Fe3a Mn2 P1 4_666 . . 98.4(7) ?
  Fe3a Mn2 P1 4_666 . 1_655 129.3(6) ?
  Fe3a Mn2 P2 4_666 . 2_656 54.8(6) ?
  Fe3a Mn2 P2 4_666 . 2_756 84.3(7) ?
  Fe3a Mn2 O1 4_666 . . 89.5(10) ?
  Fe3a Mn2 O3 4_666 . 1_655 114.7(10) ?
  Fe3a Mn2 O5 4_666 . 2_656 69.8(8) ?
  Fe3a Mn2 O6 4_666 . 2_756 93.7(8) ?
  Fe3a Mn2 O8 4_666 . 4_665 147.7(7) ?
  Fe3a Mn2 O9 4_666 . 4_666 21.0(8) ?
  Fe3b Mn2 Fe3b 4_565 . 4_666 170.92(12) ?
  Fe3b Mn2 P1 4_565 . . 54.08(17) ?
  Fe3b Mn2 P1 4_565 . 1_655 89.03(19) ?
  Fe3b Mn2 P2 4_565 . 2_656 88.19(16) ?
  Fe3b Mn2 P2 4_565 . 2_756 120.94(18) ?
  Fe3b Mn2 O1 4_565 . . 73.1(6) ?
  Fe3b Mn2 O3 4_565 . 1_655 97.7(7) ?
  Fe3b Mn2 O5 4_565 . 2_656 79.2(4) ?
  Fe3b Mn2 O6 4_565 . 2_756 103.2(4) ?
  Fe3b Mn2 O8 4_565 . 4_665 29.0(5) ?
  Fe3b Mn2 O9 4_565 . 4_666 156.7(6) ?
  Fe3b Mn2 P1 4_666 . . 130.8(2) ?
  Fe3b Mn2 P1 4_666 . 1_655 96.1(2) ?
  Fe3b Mn2 P2 4_666 . 2_656 85.96(16) ?
  Fe3b Mn2 P2 4_666 . 2_756 53.64(14) ?
  Fe3b Mn2 O1 4_666 . . 113.6(7) ?
  Fe3b Mn2 O3 4_666 . 1_655 89.7(7) ?
  Fe3b Mn2 O5 4_666 . 2_656 93.1(4) ?
  Fe3b Mn2 O6 4_666 . 2_756 70.1(4) ?
  Fe3b Mn2 O8 4_666 . 4_665 144.9(4) ?
  Fe3b Mn2 O9 4_666 . 4_666 25.8(5) ?
  P1 Mn2 P1 . . 1_655 105.2(2) ?
  P1 Mn2 P2 . . 2_656 77.5(2) ?
  P1 Mn2 P2 . . 2_756 174.32(17) ?
  P1 Mn2 O1 . . . 22.4(5) ?
  P1 Mn2 O3 . . 1_655 94.4(6) ?
  P1 Mn2 O5 . . 2_656 86.9(5) ?
  P1 Mn2 O6 . . 2_756 154.5(4) ?
  P1 Mn2 O8 . . 4_665 83.1(5) ?
  P1 Mn2 O9 . . 4_666 105.1(5) ?
  P1 Mn2 P2 1_655 . 2_656 173.9(2) ?
  P1 Mn2 P2 1_655 . 2_756 76.5(2) ?
  P1 Mn2 O1 1_655 . . 95.7(8) ?
  P1 Mn2 O3 1_655 . 1_655 21.5(8) ?
  P1 Mn2 O5 1_655 . 2_656 153.6(6) ?
  P1 Mn2 O6 1_655 . 2_756 83.6(5) ?
  P1 Mn2 O8 1_655 . 4_665 80.2(5) ?
  P1 Mn2 O9 1_655 . 4_666 108.5(5) ?
  P2 Mn2 P2 2_656 . 2_756 100.30(18) ?
  P2 Mn2 O1 2_656 . . 88.6(8) ?
  P2 Mn2 O3 2_656 . 1_655 164.6(8) ?
  P2 Mn2 O5 2_656 . 2_656 20.3(5) ?
  P2 Mn2 O6 2_656 . 2_756 91.7(5) ?
  P2 Mn2 O8 2_656 . 4_665 94.8(5) ?
  P2 Mn2 O9 2_656 . 4_666 75.7(5) ?
  P2 Mn2 O1 2_756 . . 163.2(6) ?
  P2 Mn2 O3 2_756 . 1_655 88.9(6) ?
  P2 Mn2 O5 2_756 . 2_656 89.4(5) ?
  P2 Mn2 O6 2_756 . 2_756 19.8(4) ?
  P2 Mn2 O8 2_756 . 4_665 92.0(5) ?
  P2 Mn2 O9 2_756 . 4_666 79.2(5) ?
  O1 Mn2 O3 . . 1_655 79.6(9) ?
  O1 Mn2 O5 . . 2_656 103.1(8) ?
  O1 Mn2 O6 . . 2_756 176.3(8) ?
  O1 Mn2 O8 . . 4_665 101.5(8) ?
  O1 Mn2 O9 . . 4_666 89.5(8) ?
  O3 Mn2 O5 1_655 . 2_656 175.0(9) ?
  O3 Mn2 O6 1_655 . 2_756 100.7(8) ?
  O3 Mn2 O8 1_655 . 4_665 97.2(9) ?
  O3 Mn2 O9 1_655 . 4_666 94.1(9) ?
  O5 Mn2 O6 2_656 . 2_756 76.4(7) ?
  O5 Mn2 O8 2_656 . 4_665 78.1(7) ?
  O5 Mn2 O9 2_656 . 4_666 90.2(6) ?
  O6 Mn2 O8 2_756 . 4_665 74.8(6) ?
  O6 Mn2 O9 2_756 . 4_666 94.2(6) ?
  O8 Mn2 O9 4_665 . 4_666 165.5(5) ?
  Fe1 Fe3a Mn2 1_455 . 4_464 144.3(12) ?
  Fe1 Fe3a Mn2 1_455 . 4_465 45.0(6) ?
  Fe1 Fe3a Fe3b 1_455 . 1_455 69.5(11) ?
  Fe1 Fe3a Fe3b 1_455 . . 112.2(13) ?
  Fe1 Fe3a P1 1_455 . . 92.3(11) ?
  Fe1 Fe3a P2 1_455 . . 58.0(7) ?
  Fe1 Fe3a P2 1_455 . 3_565 93.4(10) ?
  Fe1 Fe3a O2 1_455 . . 87.3(15) ?
  Fe1 Fe3a O4 1_455 . 3_565 93.6(16) ?
  Fe1 Fe3a O7 1_455 . . 76.8(12) ?
  Fe1 Fe3a O8 1_455 . . 27.6(8) ?
  Fe1 Fe3a O9 1_455 . . 159(2) ?
  Fe1 Fe3a O10b 1_455 . . 103.1(17) ?
  Fe1 Fe3a O10a 1_455 . . 115(5) ?
  Mn2 Fe3a Mn2 4_464 . 4_465 168.9(12) ?
  Mn2 Fe3a Fe3b 4_464 . 1_455 107.4(11) ?
  Mn2 Fe3a Fe3b 4_464 . . 71.6(13) ?
  Mn2 Fe3a P1 4_464 . . 120.0(14) ?
  Mn2 Fe3a P2 4_464 . . 95.2(12) ?
  Mn2 Fe3a P2 4_464 . 3_565 56.6(7) ?
  Mn2 Fe3a O2 4_464 . . 117(2) ?
  Mn2 Fe3a O4 4_464 . 3_565 65.2(13) ?
  Mn2 Fe3a O7 4_464 . . 81.0(15) ?
  Mn2 Fe3a O8 4_464 . . 152.3(17) ?
  Mn2 Fe3a O9 4_464 . . 23.3(8) ?
  Mn2 Fe3a O10b 4_464 . . 95.1(13) ?
  Mn2 Fe3a O10a 4_464 . . 91(5) ?
  Mn2 Fe3a Fe3b 4_465 . 1_455 68.0(11) ?
  Mn2 Fe3a Fe3b 4_465 . . 112.7(13) ?
  Mn2 Fe3a P1 4_465 . . 55.9(8) ?
  Mn2 Fe3a P2 4_465 . . 95.8(10) ?
  Mn2 Fe3a P2 4_465 . 3_565 125.8(14) ?
  Mn2 Fe3a O2 4_465 . . 62.9(14) ?
  Mn2 Fe3a O4 4_465 . 3_565 113(2) ?
  Mn2 Fe3a O7 4_465 . . 109.7(15) ?
  Mn2 Fe3a O8 4_465 . . 29.9(8) ?
  Mn2 Fe3a O9 4_465 . . 151.5(17) ?
  Mn2 Fe3a O10b 4_465 . . 74.6(13) ?
  Mn2 Fe3a O10a 4_465 . . 78(5) ?
  Fe3b Fe3a Fe3b 1_455 . . 178.2(18) ?
  Fe3b Fe3a P1 1_455 . . 111.7(16) ?
  Fe3b Fe3a P2 1_455 . . 114.1(14) ?
  Fe3b Fe3a P2 1_455 . 3_565 64.6(8) ?
  Fe3b Fe3a O2 1_455 . . 128(2) ?
  Fe3b Fe3a O4 1_455 . 3_565 46.7(11) ?
  Fe3b Fe3a O7 1_455 . . 131.6(18) ?
  Fe3b Fe3a O8 1_455 . . 48.7(11) ?
  Fe3b Fe3a O9 1_455 . . 123.4(17) ?
  Fe3b Fe3a O10b 1_455 . . 43.0(9) ?
  Fe3b Fe3a O10a 1_455 . . 61(4) ?
  Fe3b Fe3a P1 . . . 67.9(9) ?
  Fe3b Fe3a P2 . . . 67.6(10) ?
  Fe3b Fe3a P2 . . 3_565 115.5(17) ?
  Fe3b Fe3a O2 . . . 52.3(12) ?
  Fe3b Fe3a O4 . . 3_565 133(2) ?
  Fe3b Fe3a O7 . . . 50.0(11) ?
  Fe3b Fe3a O8 . . . 132.7(19) ?
  Fe3b Fe3a O9 . . . 55.2(14) ?
  Fe3b Fe3a O10b . . . 135.3(17) ?
  Fe3b Fe3a O10a . . . 117(4) ?
  P1 Fe3a P2 . . . 107.5(11) ?
  P1 Fe3a P2 . . 3_565 171.5(14) ?
  P1 Fe3a O2 . . . 20.4(8) ?
  P1 Fe3a O4 . . 3_565 153(2) ?
  P1 Fe3a O7 . . . 103.2(14) ?
  P1 Fe3a O8 . . . 85.7(15) ?
  P1 Fe3a O9 . . . 96.9(16) ?
  P1 Fe3a O10b . . . 84.7(12) ?
  P1 Fe3a O10a . . . 71(3) ?
  P2 Fe3a P2 . . 3_565 80.9(9) ?
  P2 Fe3a O2 . . . 88.0(14) ?
  P2 Fe3a O4 . . 3_565 98.3(14) ?
  P2 Fe3a O7 . . . 19.6(7) ?
  P2 Fe3a O8 . . . 85.5(14) ?
  P2 Fe3a O9 . . . 101.1(18) ?
  P2 Fe3a O10b . . . 157.0(18) ?
  P2 Fe3a O10a . . . 173(5) ?
  P2 Fe3a O2 3_565 . . 166(2) ?
  P2 Fe3a O4 3_565 . 3_565 20.4(7) ?
  P2 Fe3a O7 3_565 . . 84.3(13) ?
  P2 Fe3a O8 3_565 . . 96.5(15) ?
  P2 Fe3a O9 3_565 . . 79.8(14) ?
  P2 Fe3a O10b 3_565 . . 87.8(11) ?
  P2 Fe3a O10a 3_565 . . 100(3) ?
  O2 Fe3a O4 . . 3_565 173(3) ?
  O2 Fe3a O7 . . . 82.8(16) ?
  O2 Fe3a O8 . . . 90(2) ?
  O2 Fe3a O9 . . . 95(2) ?
  O2 Fe3a O10b . . . 105.2(18) ?
  O2 Fe3a O10a . . . 92(3) ?
  O4 Fe3a O7 3_565 . . 104.2(18) ?
  O4 Fe3a O8 3_565 . . 87.2(19) ?
  O4 Fe3a O9 3_565 . . 86.9(18) ?
  O4 Fe3a O10b 3_565 . . 67.8(13) ?
  O4 Fe3a O10a 3_565 . . 82(3) ?
  O7 Fe3a O8 . . . 104.4(19) ?
  O7 Fe3a O9 . . . 83(2) ?
  O7 Fe3a O10b . . . 172.1(19) ?
  O7 Fe3a O10a . . . 167(5) ?
  O8 Fe3a O9 . . . 172(2) ?
  O8 Fe3a O10b . . . 75.8(17) ?
  O8 Fe3a O10a . . . 88(5) ?
  O9 Fe3a O10b . . . 96.5(17) ?
  O9 Fe3a O10a . . . 86(5) ?
  O10b Fe3a O10a . . . 18(4) ?
  Fe1 Fe3b Mn2 . . 4_464 144.07(13) ?
  Fe1 Fe3b Mn2 . . 4_565 44.63(7) ?
  Fe1 Fe3b Fe3a . . . 111.7(10) ?
  Fe1 Fe3b Fe3a . . 1_655 66.6(9) ?
  Fe1 Fe3b Fe3b . . 4_565 129.35(12) ?
  Fe1 Fe3b P1 . . . 92.82(16) ?
  Fe1 Fe3b P2 . . . 55.88(13) ?
  Fe1 Fe3b P2 . . 3_665 92.50(14) ?
  Fe1 Fe3b O2 . . . 88.3(4) ?
  Fe1 Fe3b O4 . . 3_665 92.1(4) ?
  Fe1 Fe3b O7 . . . 70.8(4) ?
  Fe1 Fe3b O8 . . 1_655 26.5(4) ?
  Fe1 Fe3b O9 . . . 154.8(4) ?
  Fe1 Fe3b O10b . . 1_655 120.8(8) ?
  Fe1 Fe3b O10a . . 1_655 103(2) ?
  Mn2 Fe3b Mn2 4_464 . 4_565 170.92(13) ?
  Mn2 Fe3b Fe3a 4_464 . . 70.4(11) ?
  Mn2 Fe3b Fe3a 4_464 . 1_655 110.6(10) ?
  Mn2 Fe3b Fe3b 4_464 . 4_565 85.52(11) ?
  Mn2 Fe3b P1 4_464 . . 118.7(2) ?
  Mn2 Fe3b P2 4_464 . . 95.51(14) ?
  Mn2 Fe3b P2 4_464 . 3_665 57.47(15) ?
  Mn2 Fe3b O2 4_464 . . 114.6(5) ?
  Mn2 Fe3b O4 4_464 . 3_665 66.6(4) ?
  Mn2 Fe3b O7 4_464 . . 82.6(4) ?
  Mn2 Fe3b O8 4_464 . 1_655 153.1(6) ?
  Mn2 Fe3b O9 4_464 . . 26.4(5) ?
  Mn2 Fe3b O10b 4_464 . 1_655 88.0(8) ?
  Mn2 Fe3b O10a 4_464 . 1_655 98(3) ?
  Mn2 Fe3b Fe3a 4_565 . . 110.6(11) ?
  Mn2 Fe3b Fe3a 4_565 . 1_655 68.7(9) ?
  Mn2 Fe3b Fe3b 4_565 . 4_565 85.45(11) ?
  Mn2 Fe3b P1 4_565 . . 55.71(19) ?
  Mn2 Fe3b P2 4_565 . . 93.22(15) ?
  Mn2 Fe3b P2 4_565 . 3_665 127.3(2) ?
  Mn2 Fe3b O2 4_565 . . 63.1(4) ?
  Mn2 Fe3b O4 4_565 . 3_665 115.2(5) ?
  Mn2 Fe3b O7 4_565 . . 105.7(4) ?
  Mn2 Fe3b O8 4_565 . 1_655 31.4(5) ?
  Mn2 Fe3b O9 4_565 . . 148.7(5) ?
  Mn2 Fe3b O10b 4_565 . 1_655 83.3(8) ?
  Mn2 Fe3b O10a 4_565 . 1_655 75(3) ?
  Fe3a Fe3b Fe3a . . 1_655 178.2(13) ?
  Fe3a Fe3b Fe3b . . 4_565 90.8(9) ?
  Fe3a Fe3b P1 . . . 67.0(10) ?
  Fe3a Fe3b P2 . . . 69.6(9) ?
  Fe3a Fe3b P2 . . 3_665 114.1(10) ?
  Fe3a Fe3b O2 . . . 50.3(11) ?
  Fe3a Fe3b O4 . . 3_665 132.2(11) ?
  Fe3a Fe3b O7 . . . 57.7(10) ?
  Fe3a Fe3b O8 . . 1_655 131.8(12) ?
  Fe3a Fe3b O9 . . . 49.4(12) ?
  Fe3a Fe3b O10b . . 1_655 112.2(13) ?
  Fe3a Fe3b O10a . . 1_655 133(3) ?
  Fe3a Fe3b Fe3b 1_655 . 4_565 90.8(8) ?
  Fe3a Fe3b P1 1_655 . . 113.4(9) ?
  Fe3a Fe3b P2 1_655 . . 108.7(8) ?
  Fe3a Fe3b P2 1_655 . 3_665 65.7(9) ?
  Fe3a Fe3b O2 1_655 . . 129.6(10) ?
  Fe3a Fe3b O4 1_655 . 3_665 48.0(10) ?
  Fe3a Fe3b O7 1_655 . . 120.7(10) ?
  Fe3a Fe3b O8 1_655 . 1_655 46.8(11) ?
  Fe3a Fe3b O9 1_655 . . 132.0(11) ?
  Fe3a Fe3b O10b 1_655 . 1_655 69.5(12) ?
  Fe3a Fe3b O10a 1_655 . 1_655 48(3) ?
  Fe3b Fe3b P1 4_565 . . 54.02(15) ?
  Fe3b Fe3b P2 4_565 . . 158.6(2) ?
  Fe3b Fe3b P2 4_565 . 3_665 119.62(19) ?
  Fe3b Fe3b O2 4_565 . . 71.8(4) ?
  Fe3b Fe3b O4 4_565 . 3_665 105.6(4) ?
  Fe3b Fe3b O7 4_565 . . 148.6(5) ?
  Fe3b Fe3b O8 4_565 . 1_655 106.3(4) ?
  Fe3b Fe3b O9 4_565 . . 72.8(4) ?
  Fe3b Fe3b O10b 4_565 . 1_655 22.0(10) ?
  Fe3b Fe3b O10a 4_565 . 1_655 43(3) ?
  P1 Fe3b P2 . . . 108.1(2) ?
  P1 Fe3b P2 . . 3_665 173.6(2) ?
  P1 Fe3b O2 . . . 21.2(4) ?
  P1 Fe3b O4 . . 3_665 155.6(5) ?
  P1 Fe3b O7 . . . 107.9(6) ?
  P1 Fe3b O8 . . 1_655 87.1(5) ?
  P1 Fe3b O9 . . . 93.1(5) ?
  P1 Fe3b O10b . . 1_655 70.4(10) ?
  P1 Fe3b O10a . . 1_655 82(3) ?
  P2 Fe3b P2 . . 3_665 77.88(19) ?
  P2 Fe3b O2 . . . 88.5(4) ?
  P2 Fe3b O4 . . 3_665 94.4(4) ?
  P2 Fe3b O7 . . . 15.0(4) ?
  P2 Fe3b O8 . . 1_655 82.2(4) ?
  P2 Fe3b O9 . . . 99.0(4) ?
  P2 Fe3b O10b . . 1_655 176.5(8) ?
  P2 Fe3b O10a . . 1_655 156(2) ?
  P2 Fe3b O2 3_665 . . 162.9(5) ?
  P2 Fe3b O4 3_665 . 3_665 20.3(4) ?
  P2 Fe3b O7 3_665 . . 77.2(5) ?
  P2 Fe3b O8 3_665 . 1_655 96.1(5) ?
  P2 Fe3b O9 3_665 . . 83.6(5) ?
  P2 Fe3b O10b 3_665 . 1_655 103.7(10) ?
  P2 Fe3b O10a 3_665 . 1_655 93(4) ?
  O2 Fe3b O4 . . 3_665 176.8(6) ?
  O2 Fe3b O7 . . . 86.9(7) ?
  O2 Fe3b O8 . . 1_655 92.2(7) ?
  O2 Fe3b O9 . . . 88.4(7) ?
  O2 Fe3b O10b . . 1_655 90.5(11) ?
  O2 Fe3b O10a . . 1_655 103(3) ?
  O4 Fe3b O7 3_665 . . 96.2(7) ?
  O4 Fe3b O8 3_665 . 1_655 86.8(7) ?
  O4 Fe3b O9 3_665 . . 92.5(7) ?
  O4 Fe3b O10b 3_665 . 1_655 86.6(11) ?
  O4 Fe3b O10a 3_665 . 1_655 74(3) ?
  O7 Fe3b O8 . . 1_655 97.1(6) ?
  O7 Fe3b O9 . . . 84.1(6) ?
  O7 Fe3b O10b . . 1_655 168.1(9) ?
  O7 Fe3b O10a . . 1_655 168(3) ?
  O8 Fe3b O9 1_655 . . 178.7(7) ?
  O8 Fe3b O10b 1_655 . 1_655 94.5(8) ?
  O8 Fe3b O10a 1_655 . 1_655 77(3) ?
  O9 Fe3b O10b . . 1_655 84.3(8) ?
  O9 Fe3b O10a . . 1_655 102(3) ?
  O10b Fe3b O10a 1_655 . 1_655 21(3) ?
  Mn2 P1 Mn2 1_455 . . 105.20(18) ?
  Mn2 P1 Mn2 1_455 . 4_465 57.9(2) ?
  Mn2 P1 Mn2 1_455 . 4_565 137.1(3) ?
  Mn2 P1 Fe3a 1_455 . . 104.6(9) ?
  Mn2 P1 Fe3a 1_455 . 4_565 70.7(10) ?
  Mn2 P1 Fe3b 1_455 . . 148.8(3) ?
  Mn2 P1 Fe3b 1_455 . 4_565 106.69(16) ?
  Mn2 P1 O1 1_455 . . 114.7(11) ?
  Mn2 P1 O2 1_455 . . 127.0(9) ?
  Mn2 P1 O2 1_455 . 4_565 78.7(8) ?
  Mn2 P1 O3 1_455 . . 30.2(3) ?
  Mn2 P1 Mn2 . . 4_465 137.1(3) ?
  Mn2 P1 Mn2 . . 4_565 58.1(2) ?
  Mn2 P1 Fe3a . . . 148.0(10) ?
  Mn2 P1 Fe3a . . 4_565 105.2(8) ?
  Mn2 P1 Fe3b . . . 103.4(4) ?
  Mn2 P1 Fe3b . . 4_565 70.2(2) ?
  Mn2 P1 O1 . . . 31.2(4) ?
  Mn2 P1 O2 . . . 127.7(9) ?
  Mn2 P1 O2 . . 4_565 79.1(7) ?
  Mn2 P1 O3 . . . 117.1(8) ?
  Mn2 P1 Mn2 4_465 . 4_565 105.20(18) ?
  Mn2 P1 Fe3a 4_465 . . 70.7(10) ?
  Mn2 P1 Fe3a 4_465 . 4_565 104.6(9) ?
  Mn2 P1 Fe3b 4_465 . . 106.69(16) ?
  Mn2 P1 Fe3b 4_465 . 4_565 148.8(3) ?
  Mn2 P1 O1 4_465 . . 114.7(11) ?
  Mn2 P1 O2 4_465 . . 78.7(8) ?
  Mn2 P1 O2 4_465 . 4_565 127.0(9) ?
  Mn2 P1 O3 4_465 . . 30.2(3) ?
  Mn2 P1 Fe3a 4_565 . . 105.2(8) ?
  Mn2 P1 Fe3a 4_565 . 4_565 148.0(10) ?
  Mn2 P1 Fe3b 4_565 . . 70.2(2) ?
  Mn2 P1 Fe3b 4_565 . 4_565 103.4(4) ?
  Mn2 P1 O1 4_565 . . 31.2(4) ?
  Mn2 P1 O2 4_565 . . 79.1(7) ?
  Mn2 P1 O2 4_565 . 4_565 127.7(9) ?
  Mn2 P1 O3 4_565 . . 117.1(8) ?
  Fe3a P1 Fe3a . . 4_565 74.1(10) ?
  Fe3a P1 Fe3b . . . 45.1(9) ?
  Fe3a P1 Fe3b . . 4_565 90.1(9) ?
  Fe3a P1 O1 . . . 136.2(10) ?
  Fe3a P1 O2 . . . 26.2(10) ?
  Fe3a P1 O2 . . 4_565 95.6(9) ?
  Fe3a P1 O3 . . . 94.7(13) ?
  Fe3a P1 Fe3b 4_565 . . 90.1(9) ?
  Fe3a P1 Fe3b 4_565 . 4_565 45.1(9) ?
  Fe3a P1 O1 4_565 . . 136.2(10) ?
  Fe3a P1 O2 4_565 . . 95.6(9) ?
  Fe3a P1 O2 4_565 . 4_565 26.2(10) ?
  Fe3a P1 O3 4_565 . . 94.7(13) ?
  Fe3b P1 Fe3b . . 4_565 72.0(2) ?
  Fe3b P1 O1 . . . 96.2(11) ?
  Fe3b P1 O2 . . . 28.0(8) ?
  Fe3b P1 O2 . . 4_565 95.0(7) ?
  Fe3b P1 O3 . . . 136.1(6) ?
  Fe3b P1 O1 4_565 . . 96.2(11) ?
  Fe3b P1 O2 4_565 . . 95.0(7) ?
  Fe3b P1 O2 4_565 . 4_565 28.0(8) ?
  Fe3b P1 O3 4_565 . . 136.1(6) ?
  O1 P1 O2 . . . 110.0(10) ?
  O1 P1 O2 . . 4_565 110.0(10) ?
  O1 P1 O3 . . . 109.4(16) ?
  O2 P1 O2 . . 4_565 111.2(9) ?
  O2 P1 O3 . . . 108.1(10) ?
  O2 P1 O3 4_565 . . 108.1(10) ?
  Fe1 P2 Fe1 1_455 . . 101.15(16) ?
  Fe1 P2 Mn2 1_455 . 2_646 49.29(14) ?
  Fe1 P2 Mn2 1_455 . 2_746 123.07(19) ?
  Fe1 P2 Fe3a 1_455 . . 64.9(9) ?
  Fe1 P2 Fe3a 1_455 . 3_565 102.7(9) ?
  Fe1 P2 Fe3b 1_455 . . 98.28(18) ?
  Fe1 P2 Fe3b 1_455 . 3_665 151.3(2) ?
  Fe1 P2 O4 1_455 . . 124.7(8) ?
  Fe1 P2 O5 1_455 . . 20.8(5) ?
  Fe1 P2 O6 1_455 . . 109.5(7) ?
  Fe1 P2 O7 1_455 . . 92.5(8) ?
  Fe1 P2 Mn2 . . 2_646 121.71(19) ?
  Fe1 P2 Mn2 . . 2_746 49.57(12) ?
  Fe1 P2 Fe3a . . . 100.6(7) ?
  Fe1 P2 Fe3a . . 3_565 153.9(9) ?
  Fe1 P2 Fe3b . . . 67.95(14) ?
  Fe1 P2 Fe3b . . 3_665 105.0(2) ?
  Fe1 P2 O4 . . . 126.4(8) ?
  Fe1 P2 O5 . . . 110.1(6) ?
  Fe1 P2 O6 . . . 23.0(5) ?
  Fe1 P2 O7 . . . 87.5(6) ?
  Mn2 P2 Mn2 2_646 . 2_746 100.30(17) ?
  Mn2 P2 Fe3a 2_646 . . 104.8(9) ?
  Mn2 P2 Fe3a 2_646 . 3_565 68.7(9) ?
  Mn2 P2 Fe3b 2_646 . . 146.0(3) ?
  Mn2 P2 Fe3b 2_646 . 3_665 105.59(18) ?
  Mn2 P2 O4 2_646 . . 79.8(7) ?
  Mn2 P2 O5 2_646 . . 28.6(5) ?
  Mn2 P2 O6 2_646 . . 110.2(7) ?
  Mn2 P2 O7 2_646 . . 132.9(8) ?
  Mn2 P2 Fe3a 2_746 . . 148.8(7) ?
  Mn2 P2 Fe3a 2_746 . 3_565 107.2(8) ?
  Mn2 P2 Fe3b 2_746 . . 107.9(2) ?
  Mn2 P2 Fe3b 2_746 . 3_665 68.89(18) ?
  Mn2 P2 O4 2_746 . . 80.4(6) ?
  Mn2 P2 O5 2_746 . . 113.8(6) ?
  Mn2 P2 O6 2_746 . . 27.2(5) ?
  Mn2 P2 O7 2_746 . . 125.8(8) ?
  Fe3a P2 Fe3a . . 3_565 99.1(10) ?
  Fe3a P2 Fe3b . . . 42.8(8) ?
  Fe3a P2 Fe3b . . 3_665 120.2(8) ?
  Fe3a P2 O4 . . . 121.9(9) ?
  Fe3a P2 O5 . . . 82.5(11) ?
  Fe3a P2 O6 . . . 123.6(8) ?
  Fe3a P2 O7 . . . 28.8(12) ?
  Fe3a P2 Fe3b 3_565 . . 118.4(8) ?
  Fe3a P2 Fe3b 3_565 . 3_665 49.7(9) ?
  Fe3a P2 O4 3_565 . . 27.7(10) ?
  Fe3a P2 O5 3_565 . . 89.3(11) ?
  Fe3a P2 O6 3_565 . . 134.3(10) ?
  Fe3a P2 O7 3_565 . . 102.0(9) ?
  Fe3b P2 Fe3b . . 3_665 102.1(2) ?
  Fe3b P2 O4 . . . 122.9(6) ?
  Fe3b P2 O5 . . . 119.0(6) ?
  Fe3b P2 O6 . . . 88.4(6) ?
  Fe3b P2 O7 . . . 19.7(6) ?
  Fe3b P2 O4 3_665 . . 26.8(7) ?
  Fe3b P2 O5 3_665 . . 133.3(6) ?
  Fe3b P2 O6 3_665 . . 91.1(7) ?
  Fe3b P2 O7 3_665 . . 100.0(7) ?
  O4 P2 O5 . . . 106.7(10) ?
  O4 P2 O6 . . . 107.0(9) ?
  O4 P2 O7 . . . 113.7(8) ?
  O5 P2 O6 . . . 110.2(10) ?
  O5 P2 O7 . . . 111.1(10) ?
  O6 P2 O7 . . . 108.1(9) ?
  Mn2 O1 Mn2 . . 4_565 97.9(12) ?
  Mn2 O1 P1 . . . 126.4(7) ?
  Mn2 O1 P1 4_565 . . 126.4(7) ?
  Fe3a O2 Fe3b . . . 77.4(16) ?
  Fe3a O2 P1 . . . 133.4(17) ?
  Fe3b O2 P1 . . . 130.7(12) ?
  Mn2 O3 Mn2 1_455 . 4_465 98.0(14) ?
  Mn2 O3 P1 1_455 . . 128.3(8) ?
  Mn2 O3 P1 4_465 . . 128.3(8) ?
  Fe3a O4 Fe3b 3_565 . 3_665 85.3(16) ?
  Fe3a O4 P2 3_565 . . 131.9(17) ?
  Fe3b O4 P2 3_665 . . 132.9(11) ?
  Fe1 O5 Mn2 1_455 . 2_646 85.1(8) ?
  Fe1 O5 P2 1_455 . . 143.5(9) ?
  Mn2 O5 P2 2_646 . . 131.2(9) ?
  Fe1 O6 Mn2 . . 2_746 87.1(7) ?
  Fe1 O6 P2 . . . 138.7(9) ?
  Mn2 O6 P2 2_746 . . 133.0(8) ?
  Fe3a O7 Fe3b . . . 72.3(12) ?
  Fe3a O7 P2 . . . 131.5(17) ?
  Fe3b O7 P2 . . . 145.3(10) ?
  Fe1 O8 Mn2 1_455 . 4_465 81.9(5) ?
  Fe1 O8 Fe3a 1_455 . . 125.7(15) ?
  Fe1 O8 Fe3b 1_455 . 1_455 127.0(8) ?
  Mn2 O8 Fe3a 4_465 . . 123.4(13) ?
  Mn2 O8 Fe3b 4_465 . 1_455 119.6(8) ?
  Fe3a O8 Fe3b . . 1_455 84.5(12) ?
  Mn2 O9 Fe3a 4_464 . . 135.7(14) ?
  Mn2 O9 Fe3b 4_464 . . 127.8(9) ?
  Fe3a O9 Fe3b . . . 75.4(13) ?
  Fe3a O10b Fe3a . . 4_565 86.9(15) ?
  Fe3a O10b Fe3b . . 1_455 67.5(10) ?
  Fe3a O10b Fe3b . . 4_465 153.2(15) ?
  Fe3a O10b O10a . . . 43.5(10) ?
  Fe3a O10b Fe3b 4_565 . 1_455 153.2(15) ?
  Fe3a O10b Fe3b 4_565 . 4_465 67.5(10) ?
  Fe3a O10b O10a 4_565 . . 43.5(10) ?
  Fe3b O10b Fe3b 1_455 . 4_465 135.9(19) ?
  Fe3b O10b O10a 1_455 . . 110.6(15) ?
  Fe3b O10b O10a 4_465 . . 110.6(15) ?
  Fe3a O10a Fe3a . . 4_565 123(7) ?
  Fe3a O10a Fe3b . . 1_455 70.6(17) ?
  Fe3a O10a Fe3b . . 4_465 165(7) ?
  Fe3a O10a O10b . . . 118(4) ?
  Fe3a O10a Fe3b 4_565 . 1_455 165(7) ?
  Fe3a O10a Fe3b 4_565 . 4_465 70.6(17) ?
  Fe3a O10a O10b 4_565 . . 118(4) ?
  Fe3b O10a Fe3b 1_455 . 4_465 95(5) ?
  Fe3b O10a O10b 1_455 . . 48(3) ?
  Fe3b O10a O10b 4_465 . . 48(3) ?

loop_
 _geom_torsion_atom_site_label_1
 _geom_torsion_atom_site_label_2
 _geom_torsion_atom_site_label_3
 _geom_torsion_atom_site_label_4
 _geom_torsion_site_symmetry_1
 _geom_torsion_site_symmetry_2
 _geom_torsion_site_symmetry_3
 _geom_torsion_site_symmetry_4
 _geom_torsion
 _geom_torsion_publ_flag
 ? ? ? ? ? ? ? ? ? ?

loop_
 _geom_hbond_atom_site_label_D
 _geom_hbond_atom_site_label_H
 _geom_hbond_atom_site_label_A
 _geom_hbond_site_symmetry_D
 _geom_hbond_site_symmetry_H
 _geom_hbond_site_symmetry_A
 _geom_hbond_distance_DH
 _geom_hbond_distance_HA
 _geom_hbond_distance_DA
 _geom_hbond_angle_DHA
 _geom_hbond_publ_flag
 ? ? ? ? ? ? ? ? ? ? ?


#=======================================================================

# 11. STRUCTURE-FACTOR LIST

loop_
 _refln_index_h
 _refln_index_k
 _refln_index_l
 _refln_F_squared_calc
 _refln_F_squared_meas
 _refln_F_squared_sigma
 _refln_observed_status
   1   0   0  5345.30  5243.01   128.61 o
   2   0   0  5849.15  5298.60   177.98 o
   3   0   0  2490.60  2623.16   145.62 o
   4   0   0   347.18   153.91   104.54 <
   1   1   0  1522.74  1551.99    49.78 o
   2   1   0  2106.44  2001.70    72.60 o
   3   1   0  1948.80  2223.24    99.15 o
   4   1   0  1208.87   744.67    83.39 o
   1   2   0   382.65   454.69    49.78 o
   2   2   0   430.57   518.16    48.54 o
   3   2   0  4652.72  4917.34   166.36 o
   4   2   0   262.79   242.28    74.26 o
   1   3   0  1668.59  1476.49    58.08 o
   2   3   0   831.82   749.24    54.35 o
   3   3   0   917.99   774.13    70.53 o
   4   3   0   915.09   601.13   111.18 o
   0   4   0  2725.49  2855.90   105.79 o
   1   4   0  3310.82  3262.46   100.40 o
   2   4   0  1922.07  2194.61   114.92 o
   3   4   0  1403.06  1461.14   131.93 o
   4   4   0  1018.62   612.33   107.45 o
   1   5   0  4919.04  4954.68   163.46 o
   2   5   0  9374.84  9518.56   265.10 o
   3   5   0  3328.65  3458.28   174.66 o
   4   5   0  1712.19  1398.08   181.71 o
   0   6   0  5190.01  5167.50   176.73 o
   1   6   0  6487.80  6263.57   173.00 o
   2   6   0  8683.28  9070.51   239.79 o
   3   6   0   488.59   465.06    95.42 o
   4   6   0   235.94   -32.77    85.05 <
   1   7   0  3671.69  3839.12   131.51 o
   2   7   0   690.68   550.52    72.60 o
   3   7   0   110.69   141.88    89.20 <
   4   7   0   456.19   181.71    91.27 <
   0   8   0  2947.93  3192.35   141.05 o
   1   8   0  2558.26  2983.68   142.30 o
   2   8   0  5480.89  5299.02   202.45 o
   3   8   0    58.30    68.45    69.28 <
   4   8   0  1830.24  2023.69   240.20 o
   1   9   0   661.05   714.80    68.04 o
   2   9   0  3965.47  4148.61   187.93 o
   3   9   0   777.10   864.57   173.41 o
   4   9   0  1700.92  1427.54   211.58 o
   0  10   0 17848.50 20132.80   591.59 o
   1  10   0  2650.54  2808.19   141.47 o
   2  10   0   395.62   504.47    79.24 o
   3  10   0   107.32   162.62    85.05 <
   1  11   0  1226.80  1318.84    82.97 o
   2  11   0   237.12   169.26    91.68 <
   3  11   0  1034.31  1456.99   227.76 o
   0  12   0   801.18   843.00   106.62 o
   1  12   0  3627.04  4140.31   158.06 o
   2  12   0  1513.09  1613.81   178.80 o
   3  12   0   136.24   186.27   151.42 <
   1  13   0   258.44   331.89    66.38 o
   2  13   0   773.01   858.35   148.93 o
   3  13   0   935.71  1131.74   231.91 o
   0  14   0    26.71   -70.94    75.50 <
   1  14   0  2458.54  2734.35   151.42 o
   2  14   0  2306.93  2933.07   254.31 o
   1  15   0   441.01   468.79    80.48 o
   2  15   0   853.39   827.23   170.51 o
   0  16   0   163.19   169.26   120.31 <
   1  16   0   356.54   375.03   113.67 o
  -5   0   1  3320.41  3146.72   320.27 o
  -4   0   1  1646.41  2321.15   181.29 o
  -3   0   1  4507.29  4407.90   253.07 o
  -2   0   1 16982.90 15728.20   529.36 o
  -1   0   1  8940.55  8624.54   283.77 o
   1   0   1 13358.40 11614.00   411.54 o
   2   0   1  1782.09  1573.98   157.23 o
   3   0   1    63.81   -37.75    78.82 <
   4   0   1   169.16   245.60   125.70 <
  -5   1   1   559.99   561.72   182.12 o
  -4   1   1    40.91    34.43    80.07 <
  -3   1   1   109.31   158.06    63.47 <
  -2   1   1   349.05   345.16    43.56 o
  -1   1   1  2658.04  2476.72    73.02 o
   0   1   1    33.76    51.03    35.26 <
   1   1   1  9824.48  8709.59   210.33 o
   2   1   1  5691.22  5503.54   157.65 o
   3   1   1  3874.01  3896.79   194.99 o
   4   1   1    51.66   164.70    83.80 <
  -5   2   1   961.28   954.59   180.46 o
  -4   2   1    89.23   196.23    90.02 <
  -3   2   1   634.98   648.43    75.92 o
  -2   2   1   771.41   798.19    68.04 o
  -1   2   1   278.99   373.38    59.33 o
   0   2   1    28.53    15.76    35.68 <
   1   2   1 15469.70 14194.50   342.26 o
   2   2   1   100.58   161.38    56.42 <
   3   2   1   809.02   641.38    78.82 o
   4   2   1   508.56   384.58   107.86 o
  -4   3   1   222.33   219.05    90.44 <
  -3   3   1  1575.24  1655.71   101.64 o
  -2   3   1   254.27    62.23    46.46 <
  -1   3   1  1095.97  1236.28    79.65 o
   0   3   1   881.08   885.31    52.27 o
   1   3   1   634.62   734.72    68.87 o
   2   3   1  1978.95  1928.27   108.69 o
   3   3   1   278.99   248.50    76.75 o
   4   3   1   171.26   188.76   133.59 <
  -4   4   1  2284.07  2651.37   187.52 o
  -3   4   1  4737.43  4518.66   162.62 o
  -2   4   1  1014.08  1312.62   113.26 o
  -1   4   1  5798.23  5339.67   200.79 o
   0   4   1  8170.92  7557.93   190.84 o
   1   4   1   163.54   158.48    43.98 o
   2   4   1   215.73   422.33    74.26 o
   3   4   1   908.91   752.14    74.26 o
   4   4   1   822.77   494.93    99.15 o
  -4   5   1  1256.16  1459.07   205.36 o
  -3   5   1   169.22   216.14    57.67 o
  -2   5   1    48.40     2.49    40.24 <
  -1   5   1  7492.48  7031.89   253.48 o
   0   5   1  5759.55  5654.14   135.24 o
   1   5   1  9610.61  9104.53   226.93 o
   2   5   1   393.67   475.85    71.36 o
   3   5   1  1902.07  1903.38   168.85 o
   4   5   1   323.50   361.76   123.63 <
  -4   6   1    38.76   -76.33   114.92 <
  -3   6   1  6307.38  6504.19   221.54 o
  -2   6   1  5406.04  5636.71   258.87 o
  -1   6   1  7583.48  7593.20   296.21 o
   0   6   1    86.01    90.85    37.34 <
   1   6   1  3542.74  3272.42   141.88 o
   2   6   1   154.11   124.46    62.23 <
   3   6   1  1884.10  1829.12   151.01 o
   4   6   1   126.53    35.26    82.56 <
  -4   7   1  1003.07  1207.66   214.90 o
  -3   7   1   631.05   543.88    85.88 o
  -2   7   1    58.52     1.66    74.67 <
  -1   7   1  3678.78  3995.94   100.40 o
   0   7   1  5461.07  5432.60   165.53 o
   1   7   1   176.20   176.73    57.25 o
   2   7   1  1545.52  1767.31   143.96 o
   3   7   1  1869.90  1144.60   128.61 o
   4   7   1   222.14    97.91   112.84 <
  -4   8   1   293.70   129.02    98.74 <
  -3   8   1  1817.30  2208.30   207.43 o
  -2   8   1   191.77   315.71    71.36 o
  -1   8   1  4501.17  4760.94   140.64 o
   0   8   1   236.49   180.88    49.78 o
   1   8   1   262.51   261.78    50.61 o
   2   8   1  2266.93  2181.75   133.59 o
   3   8   1   503.29   313.22   104.96 <
   4   8   1  1536.88  1452.84   263.85 o
  -4   9   1    19.12  -202.87   131.93 <
  -3   9   1   160.85   180.05   119.89 <
  -2   9   1    46.90    57.67    90.02 <
  -1   9   1   852.39   887.39    59.74 o
   0   9   1   159.32   210.33    54.76 o
   1   9   1  3307.45  3587.72   163.46 o
   2   9   1   356.87   380.43    73.02 o
   3   9   1  2375.12  1830.78   234.81 o
  -4  10   1   129.20   116.99   214.90 <
  -3  10   1   433.10   491.20   153.50 o
  -2  10   1   555.91   814.79   209.09 o
  -1  10   1  1506.81  1660.69    88.78 o
   0  10   1     2.13    52.69    49.37 <
   1  10   1   208.29   155.99    62.64 <
   2  10   1   905.33   920.16    87.12 o
   3  10   1   608.94   411.54   120.72 o
  -3  11   1   656.71   404.07   146.45 <
  -2  11   1   121.13    43.98   114.92 <
  -1  11   1  1451.79  1664.84   100.40 o
   0  11   1  1909.60  2177.19   124.87 o
   1  11   1  2644.29  2841.38   142.71 o
   2  11   1    75.84   138.98    69.70 <
   3  11   1  1641.82  1642.43   201.62 o
  -3  12   1  1088.87   820.59   226.51 o
  -2  12   1  3045.96  3663.64   276.30 o
  -1  12   1  2507.05  3037.61   141.47 o
   0  12   1  6401.32  7135.60   244.35 o
   1  12   1   650.00   713.56    95.00 o
   2  12   1  1592.26  1672.72   162.21 o
   3  12   1   121.79    64.72   119.07 <
  -3  13   1   447.88   348.48   214.48 <
  -2  13   1   427.62   302.02   168.02 <
  -1  13   1   157.83   105.79    59.33 <
   0  13   1    19.84   119.89    72.60 <
   1  13   1   728.66   698.21    98.32 o
   2  13   1   594.17   643.45   116.58 o
  -2  14   1  3608.74  4882.91   414.86 o
  -1  14   1  3805.53  4307.08   171.34 o
   0  14   1    87.21    99.98    79.65 <
   1  14   1   333.32   405.73   120.31 o
   2  14   1   619.43   640.54   149.76 o
  -2  15   1    27.39   -74.26   146.03 <
  -1  15   1   658.44   791.97    98.32 o
   0  15   1   120.41   162.62    83.39 <
   1  15   1   819.86   981.15   141.05 o
  -1  16   1   266.08   163.04    79.65 <
   0  16   1   172.62   182.12    82.56 <
   1  16   1   181.65   168.02   108.69 <
  -5   0   2   191.06   553.84   218.63 <
  -4   0   2 34183.40 39973.10  2102.51 o
  -3   0   2  2574.75  3006.91   159.72 o
  -2   0   2  4088.01  4528.62   365.49 o
  -1   0   2 10197.20 10734.90   460.08 o
   0   0   2   101.24    48.95    85.05 <
   1   0   2  2542.90  2312.43   193.74 o
   2   0   2   987.98   959.57   129.85 o
   3   0   2  2090.31  1870.61   173.00 o
   4   0   2  1628.59   339.36   200.79 <
  -5   1   2   367.03   348.07   114.09 o
  -4   1   2  2736.22  3026.41   166.36 o
  -3   1   2    63.39   106.62    43.15 <
  -2   1   2  2319.88  2156.86   176.73 o
  -1   1   2  5560.76  5540.05   193.32 o
   0   1   2 11037.80 11019.50   324.42 o
   1   1   2  4098.76  3905.91   175.90 o
   2   1   2  1078.51  1005.21   126.12 o
   3   1   2   372.20    93.76    81.31 <
   4   1   2   587.13    68.04    96.25 <
  -5   2   2   272.47   248.92   102.89 <
  -4   2   2   457.02   308.24    77.58 o
  -3   2   2   990.36   879.92    64.72 o
  -2   2   2   620.27   648.43    86.71 o
  -1   2   2 16667.80 16449.60   423.99 o
   0   2   2  1588.25  1836.59   120.72 o
   1   2   2   662.65   626.03    97.49 o
   2   2   2  8306.70  8415.45   258.87 o
   3   2   2   441.01   334.79    92.93 o
   4   2   2   762.95   572.51   149.76 o
  -5   3   2   202.67   461.33   151.42 o
  -4   3   2   174.41   166.36   101.64 <
  -3   3   2  1660.50  1887.20    99.15 o
  -2   3   2  1187.88  1340.83   154.33 o
  -1   3   2  1103.97  1263.25   106.20 o
   0   3   2  1550.50  1604.27   105.38 o
   1   3   2   574.16   609.43    97.49 o
   2   3   2   688.12   642.20    93.76 o
   3   3   2    61.55   -20.74    73.02 <
   4   3   2    49.31     5.81    89.20 <
  -5   4   2   118.83   377.52   125.70 o
  -4   4   2   743.75   630.59    97.91 o
  -3   4   2  2711.72  2747.62    97.49 o
  -2   4   2  1121.49  1421.31   137.73 o
  -1   4   2   270.62   229.00    50.61 o
   0   4   2  3289.87  3398.95   155.99 o
   1   4   2  4130.98  4183.04   178.39 o
   2   4   2 21745.90 21359.50   640.54 o
   3   4   2  1157.34   633.08   120.72 o
   4   4   2  4421.33  3718.81   308.24 o
  -4   5   2   814.24   596.57   120.72 o
  -3   5   2   185.46   201.21    48.12 o
  -2   5   2 11382.00 12053.40   428.97 o
  -1   5   2  5916.24  6139.11   231.49 o
   0   5   2  1790.16  1662.76   104.13 o
   1   5   2  1163.16  1072.83    93.76 o
   2   5   2 11973.70 11227.00   405.73 o
   3   5   2   784.60   386.23    84.22 o
  -4   6   2  1776.57  2307.04   195.81 o
  -3   6   2  3918.48  4343.18   175.90 o
  -2   6   2  6503.96  7775.32   511.11 o
  -1   6   2  2938.71  3019.36   156.40 o
   0   6   2    31.07    81.31    56.01 <
   1   6   2  3075.09  2939.70   155.99 o
   2   6   2  3588.56  3309.76   206.60 o
   3   6   2   137.83   106.62    78.82 <
  -4   7   2    73.42   263.44   118.24 <
  -3   7   2   886.73   443.90    81.73 o
  -2   7   2   858.72   786.99   112.43 o
  -1   7   2   309.64   352.22    51.44 o
   0   7   2   520.70   683.69    58.50 o
   1   7   2  5212.46  5442.56   201.21 o
   2   7   2   101.44   146.03    66.38 <
   3   7   2   143.83   -46.88    95.00 <
  -4   8   2   522.79   830.14   166.36 o
  -3   8   2  1143.15   979.07   167.60 o
  -2   8   2  5339.63  5691.06   341.85 o
  -1   8   2   182.02   114.92    56.42 <
   0   8   2  4982.57  5189.49   183.78 o
   1   8   2   446.37   554.25    87.54 o
   2   8   2   682.35   580.80   108.69 o
   3   8   2  1336.59  1163.68   182.95 o
  -4   9   2   555.23   795.29   195.40 o
  -3   9   2   280.40   487.05   170.09 <
  -2   9   2  4842.21  5322.66   229.83 o
  -1   9   2  2201.23  2466.35   130.27 o
   0   9   2 11998.30 12596.80   374.20 o
   1   9   2  1396.68  1434.59   127.36 o
   2   9   2    71.05    25.31    81.73 <
   3   9   2   100.82   131.51   102.06 <
  -4  10   2  2991.99  2325.29   385.41 o
  -3  10   2   753.89   649.67   172.17 o
  -2  10   2   225.73   213.24   104.13 <
  -1  10   2   217.77   158.48    70.53 <
   0  10   2  3922.20  3972.71   165.12 o
   1  10   2  1895.86  2073.47   147.28 o
   2  10   2   360.69   510.69   133.17 o
   3  10   2  3365.39  2804.04   244.35 o
  -3  11   2   822.19   174.24   129.44 <
  -2  11   2   294.70   363.00   145.20 <
  -1  11   2  2041.86  2202.50   180.05 o
   0  11   2  5727.25  5863.23   258.04 o
   1  11   2  2524.91  2472.57   153.08 o
   2  11   2    50.73    52.69    80.48 <
  -3  12   2   970.39   247.26   200.38 <
  -2  12   2  1875.07  2049.41   258.04 o
  -1  12   2   624.78   822.25   116.58 o
   0  12   2  3866.79  4041.16   262.61 o
   1  12   2   219.77   221.54    70.94 o
   2  12   2    32.57    70.94    87.95 <
  -3  13   2   648.70   598.64   244.35 <
  -2  13   2   992.12   964.97   163.46 o
  -1  13   2  1228.98  1547.43   145.62 o
   0  13   2  3272.53  3926.24   237.30 o
   1  13   2   561.92   542.22   147.28 o
   2  13   2    52.99   -80.48   104.96 <
  -2  14   2  1977.95  1914.17   170.09 o
  -1  14   2   261.17   366.74   111.18 o
   0  14   2     6.10    24.06    81.31 <
   1  14   2   451.30   468.38   104.54 o
  -2  15   2  1142.25   893.61   199.96 o
  -1  15   2   546.38   714.80   134.83 o
   0  15   2  1877.23  2200.01   224.85 o
   1  15   2    69.82   -17.84   104.54 <
  -1  16   2   149.61   199.96    97.49 <
   0  16   2   795.39   719.37   167.60 o
  -5   0   3   259.60   551.77   216.56 <
  -4   0   3  1065.90  1125.93   148.10 o
  -2   0   3  2936.27  2664.65   200.79 o
  -1   0   3  3923.94  3805.52   290.40 o
   0   0   3    40.31    54.76   101.23 <
   1   0   3 10385.60  9833.03   609.43 o
   2   0   3  2170.82  2312.85   320.27 o
   3   0   3  1069.24   427.31   148.10 <
  -5   1   3   564.89   479.16   109.52 o
  -4   1   3    70.47    99.98    61.40 <
  -3   1   3  3168.18  3820.45   302.85 o
  -2   1   3  5012.77  5104.03   229.42 o
  -1   1   3  6734.43  6822.80   269.66 o
   0   1   3   232.59   268.83    84.63 o
   1   1   3   581.52   448.46   105.38 o
   2   1   3    22.79   124.04    71.77 <
   3   1   3   430.93   307.83   108.28 <
  -5   2   3   460.18   492.02   115.75 o
  -4   2   3   133.69   241.45    70.94 o
  -3   2   3  5106.58  5425.55   255.55 o
  -2   2   3   162.65   186.69    78.82 <
  -1   2   3   988.89  1147.09   114.92 o
   0   2   3  1707.19  2065.18   160.14 o
   1   2   3  1675.22  1769.38   173.41 o
   2   2   3  1426.45  1285.24   143.54 o
   3   2   3  1313.06   593.25   131.93 o
  -5   3   3   117.91   532.27   100.81 o
  -4   3   3   126.60   136.90    72.19 <
  -3   3   3   768.54   848.80   186.69 o
  -2   3   3  2026.68  2071.40   133.59 o
  -1   3   3   350.55   423.16   102.89 o
   0   3   3   525.54   700.28   124.46 o
   1   3   3   346.55   418.18   102.89 o
   2   3   3  2103.01  1768.55   182.95 o
   3   3   3   327.11   366.74   113.26 o
  -5   4   3   206.59    69.70    89.61 <
  -4   4   3  1664.28  1684.75   119.89 o
  -3   4   3  1511.05  1188.99   158.48 o
  -2   4   3   142.27    51.44    64.30 <
  -1   4   3  6345.55  6228.72   292.48 o
   0   4   3  5096.71  5228.49   299.94 o
   1   4   3  3620.38  4081.40   190.01 o
   2   4   3  1217.75  1288.14   141.88 o
   3   4   3  3399.70  3152.94   243.94 o
  -4   5   3  1886.61  1482.30   127.36 o
  -3   5   3  5680.25  6128.32   372.55 o
  -2   5   3   457.05   622.29    93.34 o
  -1   5   3  1889.10  2142.76   158.48 o
   0   5   3  2146.65  2284.22   166.77 o
   1   5   3    79.45    97.49    78.82 <
   2   5   3   161.05    15.76    89.61 <
   3   5   3   353.93   266.76    97.08 <
  -4   6   3    45.15   112.84    85.88 <
  -3   6   3   413.98   339.36   133.59 <
  -2   6   3   155.88   127.78    75.50 <
  -1   6   3  1894.24  1632.48   122.38 o
   0   6   3    97.48   180.05    67.62 <
   1   6   3   424.35   432.29    82.56 o
   2   6   3   283.73   258.46    99.15 <
   3   6   3   398.26    13.28   102.89 <
  -4   7   3  1046.86  1079.47   138.98 o
  -3   7   3    81.45   207.85    92.51 <
  -2   7   3  1347.99   874.94   104.13 o
  -1   7   3  4913.17  4729.41   231.49 o
   0   7   3    37.85    42.73    73.02 <
   1   7   3    26.21   135.66    89.61 <
   2   7   3   725.12   577.07   125.29 o
   3   7   3  2335.55  1805.47   210.75 o
  -4   8   3   504.87   508.62   119.48 o
  -3   8   3    47.04   158.89   107.03 <
  -2   8   3  2210.30  2162.67   160.14 o
  -1   8   3   745.02   891.12    92.93 o
   0   8   3  7986.37  7960.76   256.38 o
   1   8   3  1095.22  1076.56   132.76 o
   2   8   3  2011.29  1688.90   175.07 o
   3   8   3   162.93   -26.14   107.45 <
  -4   9   3    19.11   203.70   158.89 <
  -3   9   3  1278.67  1337.93   222.78 o
  -2   9   3   341.71   359.68    73.85 o
  -1   9   3  2454.24  2643.91   131.10 o
   0   9   3  1133.33  1381.90   119.48 o
   1   9   3   596.08   682.86   127.36 o
   2   9   3    69.47     7.88    89.20 <
  -4  10   3   114.00   -30.28   146.86 <
  -3  10   3   163.36   276.71   107.45 <
  -2  10   3   766.82   538.90   111.18 o
  -1  10   3  3152.84  3339.63   158.06 o
   0  10   3    59.68   142.71    77.99 <
   1  10   3  9245.55  9621.45   427.72 o
   2  10   3    84.28   116.99   122.38 <
  -3  11   3  1155.69   237.71   154.74 <
  -2  11   3    94.70   198.30   119.89 <
  -1  11   3  2855.32  3219.32   173.00 o
   0  11   3   212.33   298.29    97.08 o
   1  11   3    28.44    93.34    84.63 <
   2  11   3    64.03   163.46   102.47 <
  -3  12   3   191.24   123.21   182.54 <
  -2  12   3  1109.24  1076.56   225.27 o
  -1  12   3   347.15   255.14    81.31 o
   0  12   3  1137.85  1194.38   121.14 o
   1  12   3   280.38   356.36   112.43 o
   2  12   3   480.93   410.71   158.06 <
  -3  13   3   672.81   321.10   158.89 <
  -2  13   3   643.44   627.68   182.95 o
  -1  13   3   380.99   442.66   106.62 o
   0  13   3   815.98  1021.80   121.55 o
   1  13   3    16.22   117.41   119.89 <
  -2  14   3   582.03   489.12   179.63 <
  -1  14   3   257.76   251.82   130.68 <
   0  14   3   640.09   529.36   115.75 o
   1  14   3   717.34   812.71   141.05 o
  -1  15   3    56.08   152.67   181.71 <
   0  15   3   213.35    72.19   108.69 <
  -5   0   4  2407.41  1856.92   238.54 o
  -4   0   4   463.88   173.00   151.84 <
  -3   0   4    98.01   -26.55    99.98 <
  -2   0   4  1279.08  1238.36   206.60 o
  -1   0   4  5906.92  5375.35   355.12 o
   0   0   4 11892.50 11833.90   649.26 o
   1   0   4   570.18   634.32   178.39 o
   2   0   4   170.16   -22.40   179.22 <
   3   0   4  1089.81   292.89   185.86 <
  -5   1   4   315.94   -31.53   100.81 <
  -4   1   4  1253.82  1157.88   251.41 o
  -3   1   4  2560.66  1927.03   180.88 o
  -2   1   4   624.37   375.03    98.74 o
  -1   1   4   348.86   472.11   102.47 o
   0   1   4  2020.39  2224.48   167.19 o
   1   1   4  1127.93  1119.29   167.60 o
   2   1   4  1094.87   930.12   191.25 o
   3   1   4   316.91    45.22   112.84 <
  -5   2   4  1207.28  1015.58   140.22 o
  -4   2   4   149.10    14.52   149.76 <
  -3   2   4   745.45   579.15   121.55 o
  -2   2   4  8005.71  7268.36   325.67 o
  -1   2   4  1345.14  1406.79   135.24 o
   0   2   4  3245.77  3583.15   234.40 o
   1   2   4  1805.47  1935.74   205.77 o
   2   2   4    60.84   190.01    99.15 <
   3   2   4  1143.91   514.84   159.72 o
  -4   3   4   575.72   425.65   166.77 <
  -3   3   4   192.04   168.43    97.49 <
  -2   3   4   412.48   267.58    88.37 o
  -1   3   4   448.77   332.72    91.27 o
   0   3   4   575.48   675.81   129.02 o
   1   3   4  1098.98   992.35   143.13 o
   2   3   4   747.54   721.03   150.18 o
   3   3   4    20.00   -31.11   108.69 <
  -4   4   4  1782.79  2359.73   235.23 o
  -3   4   4   511.36   234.40    92.51 <
  -2   4   4 25147.50 21421.30   935.51 o
  -1   4   4  2046.35  1900.06   158.89 o
   0   4   4 11600.90 12836.60   457.59 o
   1   4   4  2074.79  1958.14   219.05 o
   2   4   4  1400.03  1054.16   162.21 o
  -4   5   4  1622.97  1760.67   258.87 o
  -3   5   4  1134.77   392.87    97.08 o
  -2   5   4  8514.58  7374.15   340.19 o
  -1   5   4    81.54    60.57    70.94 <
   0   5   4  1443.94  1561.95   150.59 o
   1   5   4   976.57   678.71   117.41 o
   2   5   4  4457.88  4944.73   311.15 o
  -4   6   4   187.00   438.51   122.38 o
  -3   6   4  1767.32  1948.60   182.54 o
  -2   6   4  4853.18  4160.22   230.66 o
  -1   6   4   376.67   351.80   110.35 o
   0   6   4   956.29   977.41   155.99 o
   1   6   4   672.35   738.87   129.44 o
   2   6   4    64.73   -94.59   114.50 <
  -4   7   4   278.50   270.49   113.26 <
  -3   7   4  2604.86  2828.11   173.41 o
  -2   7   4   100.22    97.08    90.44 <
  -1   7   4    44.50    45.22    92.10 <
   0   7   4    26.35   -16.59    71.36 <
   1   7   4  5418.83  6006.77   361.76 o
   2   7   4   526.01   340.60   129.44 <
  -4   8   4  1213.30   521.07   158.89 o
  -3   8   4   512.15   322.35   162.21 <
  -2   8   4   568.74   381.26   118.24 o
  -1   8   4  1923.54  2125.33   164.70 o
   0   8   4     4.75   -26.14    82.14 <
   1   8   4   328.26   199.13    93.34 <
   2   8   4   970.46   845.07   190.01 o
  -4   9   4  1510.55   812.71   245.18 o
  -3   9   4  1406.79    50.20    91.68 <
  -2   9   4   107.73    97.08    73.02 <
  -1   9   4   398.04   294.97    88.78 o
   0   9   4   286.45   247.67    98.74 <
   1   9   4   903.47   848.39   131.93 o
   2   9   4  2718.97  2458.46   265.10 o
  -3  10   4   747.78   145.62   152.25 <
  -2  10   4   340.15   186.27    97.08 <
  -1  10   4  6417.72  6276.43   311.56 o
   0  10   4  5757.60  6035.81   331.06 o
   1  10   4   549.20   462.15   139.81 o
  -3  11   4  1271.87   568.77   168.43 o
  -2  11   4    34.11     8.30    79.24 <
  -1  11   4    30.20    88.37    99.57 <
   0  11   4   558.58   591.18   129.44 o
   1  11   4   183.48   254.31   126.53 <
  -3  12   4   123.67   105.38   162.21 <
  -2  12   4    26.07    24.06    98.32 <
  -1  12   4   210.23   221.95   104.96 <
   0  12   4    17.54    28.21    73.85 <
   1  12   4   102.99   149.76   126.53 <
  -2  13   4    31.85   161.38   131.10 <
  -1  13   4    21.17    41.90    78.82 <
   0  13   4   103.48    77.58    94.17 <
  -1  14   4  1255.47  1357.84   144.37 o
  -4   0   5   107.61   -91.27   248.92 <
  -3   0   5  3518.73  4147.36   370.06 o
  -2   0   5  2030.82  1868.53   297.04 o
  -1   0   5   506.39   606.11   216.97 <
   0   0   5   297.30   362.59   211.58 <
   1   0   5   797.16   893.61   241.45 o
   2   0   5    65.08   155.99   155.16 <
  -4   1   5    29.05    43.98   165.12 <
  -3   1   5   323.22   416.11   135.24 o
  -2   1   5    19.35    58.50    82.56 <
  -1   1   5  1977.59  2162.67   173.83 o
   0   1   5   683.19   908.54   177.56 o
   1   1   5  1306.37  1009.77   192.49 o
   2   1   5   297.72   308.24   194.99 <
  -4   2   5   677.53   242.69   195.40 <
  -3   2   5   663.52   567.53   108.69 o
  -2   2   5  1036.40   651.33   129.02 o
  -1   2   5  2073.93  2408.27   229.00 o
   0   2   5   132.09   164.70   110.77 <
   1   2   5  1750.13  2038.63   176.73 o
   2   2   5    26.89   -10.79   106.20 <
  -4   3   5   181.75   168.02   193.74 <
  -3   3   5    94.03   127.78   102.06 <
  -2   3   5  2593.33  2521.11   174.66 o
  -1   3   5  1601.96  1655.29   184.61 o
   0   3   5  1178.91  1044.62   181.71 o
   1   3   5   421.24   441.83   180.05 <
   2   3   5    31.38    17.42   122.38 <
  -4   4   5   853.63   776.62   201.62 o
  -3   4   5  1995.54  1854.43   228.17 o
  -2   4   5  1222.34  1042.55   172.17 o
  -1   4   5  2976.49  3298.97   278.79 o
   0   4   5   202.74   238.13   102.89 <
   1   4   5   257.44   296.62   123.21 <
   2   4   5   727.22   936.76   216.97 o
  -4   5   5   322.58   145.62   192.49 <
  -3   5   5   890.78   546.37   150.59 o
  -2   5   5   259.95    56.01    95.42 <
  -1   5   5  1662.52  1722.92   177.98 o
   0   5   5   635.70   741.77   162.21 o
   1   5   5  3668.92  3752.00   354.29 o
   2   5   5   532.73   406.15   168.02 <
  -4   6   5    76.27   150.59   126.12 <
  -3   6   5   133.59   137.32    88.78 <
  -2   6   5   259.62   230.25   102.06 <
  -1   6   5   584.09   482.48   134.41 o
   0   6   5   108.24    92.93   115.33 <
   1   6   5     1.94    16.18   112.01 <
  -4   7   5   350.01    -7.05   172.58 <
  -3   7   5   235.30   130.68   134.00 <
  -2   7   5   684.30   681.20   141.47 o
  -1   7   5  4792.44  3934.95   328.57 o
   0   7   5   123.57   232.32   115.75 <
   1   7   5   419.00   661.70   155.99 o
  -3   8   5   752.33   126.53   162.62 <
  -2   8   5  2070.73  1317.60   192.49 o
  -1   8   5   430.64   357.61   111.60 o
   0   8   5   821.60   609.84   138.56 o
   1   8   5   323.69   288.74   125.70 <
  -3   9   5    83.60   123.21    99.57 <
  -2   9   5   118.39   392.04   135.24 <
  -1   9   5  1507.52  1373.60   160.97 o
   0   9   5   229.00   281.69   125.29 <
   1   9   5   916.53   859.59   197.06 o
  -3  10   5  4521.69  5895.17   456.76 o
  -2  10   5    50.71   157.65   116.58 <
  -1  10   5   873.67  1147.92   173.41 o
   0  10   5   857.08   906.89   167.19 o
  -2  11   5   109.83   109.52   122.38 <
  -1  11   5   261.65   151.84   120.72 <
   0  11   5  1715.15  1698.85   270.49 o
  -2  12   5   303.64    11.20   126.12 <
  -1  12   5    58.84    31.53   109.52 <
  -4   0   6  1105.48   426.06   247.26 <
  -3   0   6   649.09  -173.00   191.67 <
  -2   0   6   110.72   -89.20   157.23 <
  -1   0   6   643.61   277.54   231.49 <
   0   0   6  5497.87  5279.93   650.92 o
   1   0   6   874.73   755.05   219.05 o
  -4   1   6  1016.85   475.85   179.63 <
  -3   1   6   249.63   177.98   134.83 <
  -2   1   6  1018.79   969.11   203.28 o
  -1   1   6   755.27   509.45   114.92 o
   0   1   6  5548.55  6724.06   444.32 o
   1   1   6    95.69   -47.29   162.21 <
  -4   2   6   534.12    59.33   153.91 <
  -3   2   6  1244.69   652.16   163.46 o
  -2   2   6    86.50   119.89   110.35 <
  -1   2   6  1543.08  1637.04   255.55 o
   0   2   6   425.25   600.30   173.00 o
   1   2   6   112.13   372.13   157.23 <
  -4   3   6    84.07    29.46    99.15 <
  -3   3   6   234.85    54.76    99.57 <
  -2   3   6   468.44   213.24   134.83 <
  -1   3   6   313.31   429.80   141.05 o
   0   3   6   752.08   857.10   185.03 o
   1   3   6   119.06    60.98   151.01 <
  -4   4   6  3541.06  1629.16   215.31 o
  -3   4   6  2078.94   717.71   214.90 o
  -2   4   6  1032.56   719.37   185.86 o
  -1   4   6   357.71   364.66   180.88 <
   0   4   6   352.94   541.39   162.21 o
   1   4   6   495.21   511.52   197.89 <
  -3   5   6   377.79   196.64   132.76 <
  -2   5   6  4701.25  4530.69   358.02 o
  -1   5   6  2426.86  2336.91   279.62 o
   0   5   6   147.57   205.36   148.52 <
   1   5   6  1442.65  1582.28   282.11 o
  -3   6   6   627.06   367.98   127.36 <
  -2   6   6    65.25    49.78   138.56 <
  -1   6   6     1.99   -47.71   128.19 <
   0   6   6  1250.70  1117.63   224.85 o
  -3   7   6  2398.72  1178.62   324.01 o
  -2   7   6   337.58   178.80   132.34 <
  -1   7   6   503.11   599.06   163.46 o
   0   7   6   300.34   148.93   116.58 <
  -3   8   6   134.61   -59.33   146.45 <
  -2   8   6  1334.97   847.15   205.36 o
  -1   8   6   307.76    85.88   156.40 <
   0   8   6   280.33   660.46   171.75 o
  -2   9   6  2774.28  2535.21   250.16 o
  -1   9   6   773.65   697.38   185.86 o
  -3   0   7  1520.06  1402.23   389.14 o
  -2   0   7   112.53    33.60   200.38 <
  -1   0   7  1532.34  1627.50   426.48 o
  -3   1   7   479.70   175.90   120.31 <
  -2   1   7   337.32   218.63   157.65 <
  -1   1   7    75.66    77.58   127.36 <
  -3   2   7  1035.19   540.56   212.82 <
  -2   2   7    44.97    70.53   160.14 <
  -1   2   7    63.90   132.76   146.86 <
  -3   3   7    34.64   135.66   186.27 <
  -2   3   7    50.57  -194.99   109.94 <
  -1   3   7    68.33    55.18   151.84 <
  -2   4   7   843.91   898.17   244.77 o
  -1   4   7   709.79   676.64   240.20 <
  -2   5   7   540.98   283.35   180.05 <
  -1   5   7  1567.94  1367.38   317.37 o

loop_
 _twin_refln_datum_id
 _twin_refln_individual_id
 _twin_refln_index_h
 _twin_refln_index_k
 _twin_refln_index_l
 _twin_refln_F_squared_calc
 _twin_refln_F_squared_meas
 _twin_refln_F_squared_sigma
 _twin_refln_include_status
 ? ? ? ? ? ? ? ? ?
