# Supplementary material for: Manganrockbridgeite, Mn2+2Fe3+3(PO4)3(OH)4(H2O), a new member of the rockbridgeite group, from the Hagendorf-Süd pegmatite, Oberpfalz, Bavaria
Source: Copernicus journal article supplement (doi:10.5194/ejm-35-295-2023), 2023-04-25
Supplement: Supplementary file 1 [file ejm-35-295-2023-supplement.zip › ejm-35-295-2023-supplement-title-page.pdf]

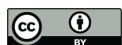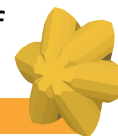

*Supplement of*

**Manganrockbridgeite,  $\text{Mn}_2^{2+}\text{Fe}_3^{3+}(\text{PO}_4)_3(\text{OH})_4(\text{H}_2\text{O})$ ,  
a new member of the rockbridgeite group, from the  
Hagendorf-Süd pegmatite, Oberpfalz, Bavaria**

**Ian E. Grey et al.**

*Correspondence to:* Ian E. Grey ([ian.grey@csiro.au](mailto:ian.grey@csiro.au))

- [ejm-35-295-2023-supplement-title-page.pdf](#)
- [AK\\_SC\\_10feba.cif](#)
- [Hag510\\_SR\\_AKcoords.cif](#)
- [checkcif\\_Rigaku.pdf](#)
- [checkcif\\_SR.pdf](#)

The copyright of individual parts of the supplement might differ from the article licence.
