# Supplementary material for: Manganrockbridgeite, Mn2+2Fe3+3(PO4)3(OH)4(H2O), a new member of the rockbridgeite group, from the Hagendorf-Süd pegmatite, Oberpfalz, Bavaria
Source: Copernicus journal article supplement (doi:10.5194/ejm-35-295-2023), 2023-04-25
Supplement: Supplementary file 1 [file ejm-35-295-2023-supplement.zip › Hag510_SR_AKcoords.cif]

#=======================================================================
data_global
#=======================================================================

_audit_creation_method                   'Jana2006 Version : 25/03/2021'


# 1. PROCESSING SUMMARY (IUCr Office Use Only)

_journal_date_recd_electronic            ?
_journal_date_to_coeditor                ?
_journal_date_from_coeditor              ?
_journal_date_accepted                   ?
_journal_date_printers_first             ?
_journal_date_printers_final             ?
_journal_date_proofs_out                 ?
_journal_date_proofs_in                  ?
_journal_coeditor_name                   ?
_journal_coeditor_code                   ?
_journal_coeditor_notes
; ?
;
_journal_techeditor_code                 ?
_journal_paper_category                  ?
_journal_techeditor_notes
; ?
;
_journal_coden_ASTM                      ?
_journal_name_full                       'Acta Crystallographica Section C'
_journal_year                            ?
_journal_volume                          ?
_journal_issue                           ?
_journal_page_first                      ?
_journal_page_last                       ?
_journal_suppl_publ_number               ?
_journal_suppl_publ_pages                ?

#=======================================================================

# 2. SUBMISSION DETAILS

_publ_contact_author_name                ?
_publ_contact_author_address
; ?
;
_publ_contact_author_email               ?
_publ_contact_author_fax                 ?
_publ_contact_author_phone               ?

_publ_requested_journal                  'Acta Crystallographica Section C'
_publ_requested_category                 ?

_publ_contact_letter
; ?
;

#=======================================================================

# 3. TITLE AND AUTHOR LIST

_publ_section_title
; ?
;
_publ_section_title_footnote
; ?
;
loop_
 _publ_author_name
 _publ_author_footnote
 _publ_author_address
; ?      # name
;
; ?      # footnote
;
; ?      # address
;

#=======================================================================

# 4. TEXT

_publ_section_synopsis
; ?
;
_publ_section_abstract
; ?
;
_publ_section_comment
; ?
;
_publ_section_introduction
; ?
;
_publ_section_experimental
; ?
;
_publ_section_exptl_prep
; ?
;
_publ_section_exptl_refinement
; ?
;
_publ_section_exptl_solution
; ?
;
_publ_section_discussion
; ?
;
_publ_section_acknowledgements
; ?
;
_publ_section_references
;
Petricek, V., Dusek, M. & Palatinus L. (2014). Z. Kristallogr. 229(5), 345-352.

Palatinus L. & Chapuis G. (2007). J. Appl. Cryst. 40, 786-790.

# enable this reference if Diamond ver. 2 was used for visualization
#Brandenburg, K. (1999). DIAMOND. Version. 2.1c.
#Crystal Impact GbR, Bonn, Germany.

# enable this reference if Diamond ver. 3 was used for visualization
#Brandenburg, K. & Putz, H. (2005). DIAMOND Version 3.
#Crystal Impact GbR, Postfach 1251, D-53002 Bonn, Germany.

# enable this reference if SIR97 was used for solving of the structure
#Altomare, A., Burla, M. C., Camalli, M., Cascarano, G., Giacovazzo, C.,
#Guagliardi, A., Moliterni, A. G. G., Polidori, G., Spagna, R. (1997).
#SIR97. A Package for Crystal Structure Solution by Direct Methods
#and Refinement, Bari, Rome, Italy.

# use this reference if SIR2002 was used for solving of the structure
#Burla, M.C., Camalli, M., Carrozzini, B., Cascarano, G., Giacovazzo, C.,
#Polidori, G., Spagna, R.
#SIR2002: the program, J. Appl. Cryst, (2003). 36, 1103


# use this reference if SIR2011 was used for solving of the structure
#Burla, M.C., Caliandro, R., Camalli, M., Carrozzini, B., Cascarano,
#G.L., Giacovazzo, C., Mallamo. M., Mazzone, A., Polidori, G., Spagna, R.
#SIR2011: a new package for crystal structure determination and refinement,
#J.Appl.Cryst. (2012) 45, 357-361

# enable this reference if bond valences were calculated
#Brown, I. D. (1996). J. Appl. Cryst. 29, 479-480.

# enable this reference if Xshape wase used for crystal shape refinement
#Stoe & Cie (1998). X-SHAPE. Stoe & Cie, Darmstadt, Germany.


# enable this reference if Flack coefficient was refined
#Flack, H. D. (1983). Acta Cryst. A39, 876-881.
;
_publ_section_figure_captions
; ?
;
_publ_section_table_legends
; ?
;

#=======================================================================
data_I
#=======================================================================

# 5. CHEMICAL DATA

_chemical_name_systematic
; ?
;
_chemical_name_common                    ?
_chemical_formula_moiety                 ?
_chemical_formula_structural             ?
_chemical_formula_analytical             ?
_chemical_formula_iupac                  ?
_chemical_formula_sum                    'O17 H6 P3 Mn2 Fe3'
_chemical_formula_weight                 648.4
_chemical_melting_point                  ?
_chemical_compound_source                ?
_chemical_absolute_configuration         .

#=======================================================================

# 6. CRYSTAL DATA

_symmetry_cell_setting                   monoclinic
_symmetry_space_group_name_H-M           'P 1 21/m 1'
_symmetry_space_group_name_Hall          '-P 2yb'
_symmetry_Int_Tables_number              11

loop_
 _space_group_symop_id
 _space_group_symop_operation_xyz
 1   x,y,z
 2   -x,y+1/2,-z
 3   -x,-y,-z
 4   x,-y+1/2,z

_cell_length_a                           5.198(4)
_cell_length_b                           16.905(6)
_cell_length_c                           7.510(12)
_cell_angle_alpha                        90
_cell_angle_beta                         110.02(3)
_cell_angle_gamma                        90
_cell_volume                             620.0(11)

loop_
 _twin_individual_id
 _twin_individual_mass_fraction_refined
 _twin_individual_twin_matrix_11
 _twin_individual_twin_matrix_12
 _twin_individual_twin_matrix_13
 _twin_individual_twin_matrix_21
 _twin_individual_twin_matrix_22
 _twin_individual_twin_matrix_23
 _twin_individual_twin_matrix_31
 _twin_individual_twin_matrix_32
 _twin_individual_twin_matrix_33
1 0.414(5)
1 0 0
0 1 0
0 0 1
2 0.586(5)
-1 0 0.9892
0 -1 0
0 0 1

_cell_formula_units_Z                    2

_cell_measurement_reflns_used            4197
_cell_measurement_theta_min              2.41
_cell_measurement_theta_max              31.59
_cell_measurement_temperature            100
_cell_special_details
; ?
;

_exptl_crystal_density_diffrn            3.4728
_exptl_crystal_density_meas              ?
_exptl_crystal_density_method            ?
_exptl_crystal_F_000                     609

_exptl_absorpt_coefficient_mu            5.902
_exptl_crystal_description               'blade'
_exptl_crystal_size_max                  0.10
_exptl_crystal_size_mid                  0.015
_exptl_crystal_size_min                  0.005
_exptl_crystal_size_rad                  ?
_exptl_crystal_colour                    'black'
_exptl_absorpt_correction_type           'multi-scan'
_exptl_absorpt_process_details           ?
_exptl_absorpt_correction_T_min          0.519
_exptl_absorpt_correction_T_max          0.746
loop_
 _exptl_crystal_face_index_h
 _exptl_crystal_face_index_k
 _exptl_crystal_face_index_l
 _exptl_crystal_face_perp_dist
 ? ? ? ?

#=======================================================================

# 7. EXPERIMENTAL DATA

_exptl_special_details                   ?

_diffrn_ambient_temperature              100
_diffrn_source                           ?
_diffrn_source_power                     ?
_diffrn_source_voltage                   ?
_diffrn_source_current                   ?
_diffrn_radiation_type                   'synchrotron'
_diffrn_radiation_source                 'synchrotron'
_diffrn_radiation_wavelength             0.7109
_diffrn_radiation_monochromator          ?
_diffrn_measurement_device               'synchrotron'
_diffrn_measurement_device_type          'image plate'
_diffrn_detector                         ?
_diffrn_detector_area_resol_mean         ?
_diffrn_measurement_method               ?
_diffrn_measurement_specimen_support     ?

_diffrn_reflns_number                    4197
_diffrn_reflns_theta_min                 2.41
_diffrn_reflns_theta_max                 31.59
_diffrn_reflns_theta_full                20.39
_diffrn_measured_fraction_theta_max      0.73
_diffrn_measured_fraction_theta_full     0.93
_diffrn_reflns_av_R_equivalents          0.1034
_diffrn_reflns_av_unetI/netI             0.0677
_diffrn_reflns_limit_h_min               -5
_diffrn_reflns_limit_h_max               5
_diffrn_reflns_limit_k_min               -20
_diffrn_reflns_limit_k_max               22
_diffrn_reflns_limit_l_min               -10
_diffrn_reflns_limit_l_max               10
_diffrn_reflns_reduction_process         ?

_diffrn_standards_number                 ?
_diffrn_standards_interval_count         ?
_diffrn_standards_interval_time          ?
_diffrn_standards_decay_%                ?
loop_
_diffrn_standard_refln_index_h
_diffrn_standard_refln_index_k
_diffrn_standard_refln_index_l
  ? ? ?

_diffrn_radiation_probe                  X-ray

#=======================================================================

# 8. REFINEMENT DATA

_refine_special_details
; ?
;

_reflns_number_total                     1069
_reflns_number_gt                        1008
_reflns_threshold_expression             'I>3\s(I)'

_refine_ls_structure_factor_coef         F
_refine_ls_R_factor_gt                   0.0759
_refine_ls_wR_factor_gt                  0.0998
_refine_ls_R_factor_all                  0.0936
_refine_ls_wR_factor_ref                 0.1032
_refine_ls_goodness_of_fit_ref           3.06
_refine_ls_goodness_of_fit_gt            3.05
_refine_ls_restrained_S_gt               ?
_refine_ls_restrained_S_all              ?
_refine_ls_number_reflns                 1069
_refine_ls_number_parameters             57
_refine_ls_number_restraints             0
_refine_ls_number_constraints            0
_refine_ls_weighting_scheme              sigma
_refine_ls_weighting_details             'w=1/(\s^2^(F)+0.0001F^2^)'
_refine_ls_hydrogen_treatment            'constr'
_refine_ls_shift/su_max                  0.0073
_refine_ls_shift/su_mean                 0.0022
_refine_diff_density_max                 1.77
_refine_diff_density_min                 -1.73
_refine_ls_extinction_method             'none'
_refine_ls_extinction_coef               ?
_refine_ls_extinction_expression         ?
_refine_ls_abs_structure_details         ?
_refine_ls_abs_structure_Flack           ?
_refine_ls_abs_structure_Rogers          ?

loop_
 _atom_type_symbol
 _atom_type_scat_dispersion_real
 _atom_type_scat_dispersion_imag
 _atom_type_scat_source
 Fe   0.3463  0.8444
 'International Tables Vol C tables 4.2.6.8 and 6.1.1.1'
 H    0.0000  0.0000
 'International Tables Vol C tables 4.2.6.8 and 6.1.1.1'
 Mn   0.3368  0.7283
 'International Tables Vol C tables 4.2.6.8 and 6.1.1.1'
 O    0.0106  0.0060
 'International Tables Vol C tables 4.2.6.8 and 6.1.1.1'
 P    0.1023  0.0942
 'International Tables Vol C tables 4.2.6.8 and 6.1.1.1'

_computing_data_collection               ?
_computing_cell_refinement               ?
_computing_data_reduction                ?
_computing_structure_solution            ?
_computing_structure_refinement          ?
_computing_molecular_graphics            ?
_computing_publication_material          ?

loop_
 _restr_distance_atom_site_label_1
 _restr_distance_site_symmetry_1
 _restr_distance_atom_site_label_2
 _restr_distance_site_symmetry_2
 _restr_distance_target
 _restr_distance_target_weight_param
 ? ? ? ? ? ?

loop_
 _restr_angle_atom_site_label_1
 _restr_angle_site_symmetry_1
 _restr_angle_atom_site_label_2
 _restr_angle_site_symmetry_2
 _restr_angle_atom_site_label_3
 _restr_angle_site_symmetry_3
 _restr_angle_target
 _restr_angle_target_weight_param
 ? ? ? ? ? ? ? ?

loop_
 _restr_torsion_atom_site_label_1
 _restr_torsion_site_symmetry_1
 _restr_torsion_atom_site_label_2
 _restr_torsion_site_symmetry_2
 _restr_torsion_atom_site_label_3
 _restr_torsion_site_symmetry_3
 _restr_torsion_atom_site_label_4
 _restr_torsion_site_symmetry_4
 _restr_torsion_angle_target
 _restr_torsion_weight_param
 ? ? ? ? ? ? ? ? ? ?

loop_
 _restr_equal_distance_atom_site_label_1
 _restr_equal_distance_site_symmetry_1
 _restr_equal_distance_atom_site_label_2
 _restr_equal_distance_site_symmetry_2
 _restr_equal_distance_class_class_id
 _restr_equal_distance_class_target_weight_param
 ? ? ? ? ? ?

loop_
 _restr_equal_angle_atom_site_label_1
 _restr_equal_angle_site_symmetry_1
 _restr_equal_angle_atom_site_label_2
 _restr_equal_angle_site_symmetry_2
 _restr_equal_angle_atom_site_label_3
 _restr_equal_angle_site_symmetry_3
 _restr_equal_angle_class_class_id
 _restr_equal_angle_class_target_weight_param
 ? ? ? ? ? ? ? ?

loop_
 _restr_equal_torsion_atom_site_label_1
 _restr_equal_torsion_site_symmetry_1
 _restr_equal_torsion_atom_site_label_2
 _restr_equal_torsion_site_symmetry_2
 _restr_equal_torsion_atom_site_label_3
 _restr_equal_torsion_site_symmetry_3
 _restr_equal_torsion_atom_site_label_4
 _restr_equal_torsion_site_symmetry_4
 _restr_equal_torsion_class_class_id
 _restr_equal_torsion_class_target_weight_param
 ? ? ? ? ? ? ? ? ? ?


#=======================================================================

# 9. ATOMIC COORDINATES AND DISPLACEMENT PARAMETERS

loop_
 _atom_site_label
 _atom_site_type_symbol
 _atom_site_fract_x
 _atom_site_fract_y
 _atom_site_fract_z
 _atom_site_adp_type
 _atom_site_U_iso_or_equiv
 _atom_site_site_symmetry_multiplicity
 _atom_site_occupancy
 _atom_site_calc_flag
 _atom_site_refinement_flags
 _atom_site_disorder_assembly
 _atom_site_disorder_group
  Fe1 Fe 1 0.5 0.5 Uiso 0.0136(9) 2 0.978(14) d . . .
  Mn2 Fe 1.0493(4) 0.84365(10) 0.6378(2) Uiso 0.0124(8) 4 0.882(11) d . . .
  Fe3 Fe 0.5499(4) 0.63937(9) 0.1443(2) Uiso 0.0125(5) 4 1 d . . .
  P1 P 0.4678(10) 0.75 0.4659(6) Uiso 0.0114(8) 2 1 d . . .
  P2 P 0.3746(7) 0.45587(14) 0.2151(4) Uiso 0.0111(7) 4 1 d . . .
  O1 O 0.770(3) 0.75 0.5983(17) Uiso 0.015(2) 2 1 d . . .
  O2 O 0.4041(18) 0.6761(4) 0.3453(11) Uiso 0.0142(18) 4 1 d . . .
  O3 O 0.283(3) 0.75 0.5941(19) Uiso 0.023(3) 2 1 d . . .
  O4 O 0.2912(19) 0.3923(4) 0.0544(11) Uiso 0.0114(15) 4 1 d . . .
  O5 O 0.1810(18) 0.4449(4) 0.3348(13) Uiso 0.0157(17) 4 1 d . . .
  O6 O 0.6715(17) 0.4393(4) 0.3425(11) Uiso 0.0108(16) 4 1 d . . .
  O7 O 0.3567(16) 0.5387(4) 0.1360(12) Uiso 0.0143(16) 4 1 d . . .
  O8 O -0.0921(19) 0.6051(5) 0.3468(12) Uiso 0.0206(19) 4 1 d . . .
  O9 O 0.1775(17) 0.6755(4) -0.0624(12) Uiso 0.0120(17) 4 1 d . . .
  O10 O -0.323(3) 0.75 0.1208(19) Uiso 0.019(3) 2 1 d . . .

loop_
 _atom_site_aniso_label
 _atom_site_aniso_type_symbol
 _atom_site_aniso_U_11
 _atom_site_aniso_U_22
 _atom_site_aniso_U_33
 _atom_site_aniso_U_12
 _atom_site_aniso_U_13
 _atom_site_aniso_U_23
 ? ? ? ? ? ? ? ?

loop_
 _jana_atom_site_ADP_C_label
 _jana_atom_site_ADP_C_type_symbol
 _jana_atom_site_ADP_C_111
 _jana_atom_site_ADP_C_112
 _jana_atom_site_ADP_C_113
 _jana_atom_site_ADP_C_122
 _jana_atom_site_ADP_C_123
 _jana_atom_site_ADP_C_133
 _jana_atom_site_ADP_C_222
 _jana_atom_site_ADP_C_223
 _jana_atom_site_ADP_C_233
 _jana_atom_site_ADP_C_333
 ? ? ? ? ? ? ? ? ? ? ? ?

loop_
 _jana_atom_site_ADP_D_label
 _jana_atom_site_ADP_D_type_symbol
 _jana_atom_site_ADP_D_1111
 _jana_atom_site_ADP_D_1112
 _jana_atom_site_ADP_D_1113
 _jana_atom_site_ADP_D_1122
 _jana_atom_site_ADP_D_1123
 _jana_atom_site_ADP_D_1133
 _jana_atom_site_ADP_D_1222
 _jana_atom_site_ADP_D_1223
 _jana_atom_site_ADP_D_1233
 _jana_atom_site_ADP_D_1333
 _jana_atom_site_ADP_D_2222
 _jana_atom_site_ADP_D_2223
 _jana_atom_site_ADP_D_2233
 _jana_atom_site_ADP_D_2333
 _jana_atom_site_ADP_D_3333
 ? ? ? ? ? ? ? ? ? ? ? ? ? ? ? ? ?

loop_
 _jana_atom_site_ADP_E_label
 _jana_atom_site_ADP_E_type_symbol
 _jana_atom_site_ADP_E_11111
 _jana_atom_site_ADP_E_11112
 _jana_atom_site_ADP_E_11113
 _jana_atom_site_ADP_E_11122
 _jana_atom_site_ADP_E_11123
 _jana_atom_site_ADP_E_11133
 _jana_atom_site_ADP_E_11222
 _jana_atom_site_ADP_E_11223
 _jana_atom_site_ADP_E_11233
 _jana_atom_site_ADP_E_11333
 _jana_atom_site_ADP_E_12222
 _jana_atom_site_ADP_E_12223
 _jana_atom_site_ADP_E_12233
 _jana_atom_site_ADP_E_12333
 _jana_atom_site_ADP_E_13333
 _jana_atom_site_ADP_E_22222
 _jana_atom_site_ADP_E_22223
 _jana_atom_site_ADP_E_22233
 _jana_atom_site_ADP_E_22333
 _jana_atom_site_ADP_E_23333
 _jana_atom_site_ADP_E_33333
 ? ? ? ? ? ? ? ? ? ? ? ? ? ? ? ? ? ? ? ? ? ? ?

loop_
 _jana_atom_site_ADP_F_label
 _jana_atom_site_ADP_F_type_symbol
 _jana_atom_site_ADP_F_111111
 _jana_atom_site_ADP_F_111112
 _jana_atom_site_ADP_F_111113
 _jana_atom_site_ADP_F_111122
 _jana_atom_site_ADP_F_111123
 _jana_atom_site_ADP_F_111133
 _jana_atom_site_ADP_F_111222
 _jana_atom_site_ADP_F_111223
 _jana_atom_site_ADP_F_111233
 _jana_atom_site_ADP_F_111333
 _jana_atom_site_ADP_F_112222
 _jana_atom_site_ADP_F_112223
 _jana_atom_site_ADP_F_112233
 _jana_atom_site_ADP_F_112333
 _jana_atom_site_ADP_F_113333
 _jana_atom_site_ADP_F_122222
 _jana_atom_site_ADP_F_122223
 _jana_atom_site_ADP_F_122233
 _jana_atom_site_ADP_F_122333
 _jana_atom_site_ADP_F_123333
 _jana_atom_site_ADP_F_133333
 _jana_atom_site_ADP_F_222222
 _jana_atom_site_ADP_F_222223
 _jana_atom_site_ADP_F_222233
 _jana_atom_site_ADP_F_222333
 _jana_atom_site_ADP_F_223333
 _jana_atom_site_ADP_F_233333
 _jana_atom_site_ADP_F_333333
 ? ? ? ? ? ? ? ? ? ? ? ? ? ? ? ? ? ? ? ? ? ? ? ? ? ? ? ? ? ?


#=======================================================================

# 10. MOLECULAR GEOMETRY


loop_
 _geom_bond_atom_site_label_1
 _geom_bond_atom_site_label_2
 _geom_bond_site_symmetry_1
 _geom_bond_site_symmetry_2
 _geom_bond_distance
 _geom_bond_publ_flag
  Fe1 Mn2 . 2_746 2.818(3) ?
  Fe1 Mn2 . 4_565 2.818(3) ?
  Fe1 Fe3 . . 3.726(7) ?
  Fe1 Fe3 . 3_766 3.726(7) ?
  Fe1 P2 . . 3.307(8) ?
  Fe1 P2 . 1_655 3.432(6) ?
  Fe1 P2 . 3_666 3.432(6) ?
  Fe1 P2 . 3_766 3.307(8) ?
  Fe1 O5 . 1_655 2.023(11) ?
  Fe1 O5 . 3_666 2.023(11) ?
  Fe1 O6 . . 1.997(8) ?
  Fe1 O6 . 3_766 1.997(8) ?
  Fe1 O8 . 1_655 2.082(9) ?
  Fe1 O8 . 3_666 2.082(9) ?
  Mn2 Mn2 . 4_565 3.166(3) ?
  Mn2 Fe3 . 4_565 3.738(13) ?
  Mn2 P1 . . 3.261(7) ?
  Mn2 P1 . 1_655 3.290(6) ?
  Mn2 P2 . 2_656 3.368(5) ?
  Mn2 P2 . 2_756 3.394(6) ?
  Mn2 O1 . . 2.098(9) ?
  Mn2 O3 . 1_655 2.089(11) ?
  Mn2 O5 . 2_656 2.138(9) ?
  Mn2 O6 . 2_756 2.143(8) ?
  Mn2 O8 . 4_665 2.228(11) ?
  Mn2 O9 . 4_666 2.143(11) ?
  Fe3 Fe3 . 4_565 3.740(3) ?
  Fe3 P1 . . 3.197(7) ?
  Fe3 P2 . . 3.327(4) ?
  Fe3 P2 . 3_665 3.280(8) ?
  Fe3 O2 . . 2.005(11) ?
  Fe3 O4 . 3_665 2.010(11) ?
  Fe3 O7 . . 1.966(8) ?
  Fe3 O8 . 1_655 2.043(9) ?
  Fe3 O9 . . 2.115(9) ?
  Fe3 O10 . 1_655 2.012(6) ?
  P1 O1 . . 1.546(12) ?
  P1 O2 . . 1.512(8) ?
  P1 O2 . 4_565 1.512(8) ?
  P1 O3 . . 1.576(18) ?
  P2 O4 . . 1.562(8) ?
  P2 O5 . . 1.573(12) ?
  P2 O6 . . 1.538(9) ?
  P2 O7 . . 1.511(8) ?

loop_
 _geom_angle_atom_site_label_1
 _geom_angle_atom_site_label_2
 _geom_angle_atom_site_label_3
 _geom_angle_site_symmetry_1
 _geom_angle_site_symmetry_2
 _geom_angle_site_symmetry_3
 _geom_angle
 _geom_angle_publ_flag
  Mn2 Fe1 Mn2 2_746 . 4_565 180 ?
  Mn2 Fe1 Fe3 2_746 . . 111.96(9) ?
  Mn2 Fe1 Fe3 2_746 . 3_766 68.04(9) ?
  Mn2 Fe1 P2 2_746 . . 66.75(7) ?
  Mn2 Fe1 P2 2_746 . 1_655 64.34(7) ?
  Mn2 Fe1 P2 2_746 . 3_666 115.66(7) ?
  Mn2 Fe1 P2 2_746 . 3_766 113.25(7) ?
  Mn2 Fe1 O5 2_746 . 1_655 49.1(2) ?
  Mn2 Fe1 O5 2_746 . 3_666 130.9(2) ?
  Mn2 Fe1 O6 2_746 . . 49.3(2) ?
  Mn2 Fe1 O6 2_746 . 3_766 130.7(2) ?
  Mn2 Fe1 O8 2_746 . 1_655 128.5(2) ?
  Mn2 Fe1 O8 2_746 . 3_666 51.5(2) ?
  Mn2 Fe1 Fe3 4_565 . . 68.04(9) ?
  Mn2 Fe1 Fe3 4_565 . 3_766 111.96(9) ?
  Mn2 Fe1 P2 4_565 . . 113.25(7) ?
  Mn2 Fe1 P2 4_565 . 1_655 115.66(7) ?
  Mn2 Fe1 P2 4_565 . 3_666 64.34(7) ?
  Mn2 Fe1 P2 4_565 . 3_766 66.75(7) ?
  Mn2 Fe1 O5 4_565 . 1_655 130.9(2) ?
  Mn2 Fe1 O5 4_565 . 3_666 49.1(2) ?
  Mn2 Fe1 O6 4_565 . . 130.7(2) ?
  Mn2 Fe1 O6 4_565 . 3_766 49.3(2) ?
  Mn2 Fe1 O8 4_565 . 1_655 51.5(2) ?
  Mn2 Fe1 O8 4_565 . 3_666 128.5(2) ?
  Fe3 Fe1 Fe3 . . 3_766 180 ?
  Fe3 Fe1 P2 . . . 56.08(8) ?
  Fe3 Fe1 P2 . . 1_655 92.38(11) ?
  Fe3 Fe1 P2 . . 3_666 87.62(11) ?
  Fe3 Fe1 P2 . . 3_766 123.92(8) ?
  Fe3 Fe1 O5 . . 1_655 99.3(2) ?
  Fe3 Fe1 O5 . . 3_666 80.7(2) ?
  Fe3 Fe1 O6 . . . 72.6(2) ?
  Fe3 Fe1 O6 . . 3_766 107.4(2) ?
  Fe3 Fe1 O8 . . 1_655 25.2(2) ?
  Fe3 Fe1 O8 . . 3_666 154.8(2) ?
  Fe3 Fe1 P2 3_766 . . 123.92(8) ?
  Fe3 Fe1 P2 3_766 . 1_655 87.62(11) ?
  Fe3 Fe1 P2 3_766 . 3_666 92.38(11) ?
  Fe3 Fe1 P2 3_766 . 3_766 56.08(8) ?
  Fe3 Fe1 O5 3_766 . 1_655 80.7(2) ?
  Fe3 Fe1 O5 3_766 . 3_666 99.3(2) ?
  Fe3 Fe1 O6 3_766 . . 107.4(2) ?
  Fe3 Fe1 O6 3_766 . 3_766 72.6(2) ?
  Fe3 Fe1 O8 3_766 . 1_655 154.8(2) ?
  Fe3 Fe1 O8 3_766 . 3_666 25.2(2) ?
  P2 Fe1 P2 . . 1_655 100.93(13) ?
  P2 Fe1 P2 . . 3_666 79.07(13) ?
  P2 Fe1 P2 . . 3_766 180 ?
  P2 Fe1 O5 . . 1_655 93.4(2) ?
  P2 Fe1 O5 . . 3_666 86.6(2) ?
  P2 Fe1 O6 . . . 18.0(2) ?
  P2 Fe1 O6 . . 3_766 162.0(2) ?
  P2 Fe1 O8 . . 1_655 81.1(2) ?
  P2 Fe1 O8 . . 3_666 98.9(2) ?
  P2 Fe1 P2 1_655 . 3_666 180 ?
  P2 Fe1 P2 1_655 . 3_766 79.07(13) ?
  P2 Fe1 O5 1_655 . 1_655 15.3(2) ?
  P2 Fe1 O5 1_655 . 3_666 164.7(2) ?
  P2 Fe1 O6 1_655 . . 94.1(3) ?
  P2 Fe1 O6 1_655 . 3_766 85.9(3) ?
  P2 Fe1 O8 1_655 . 1_655 85.0(3) ?
  P2 Fe1 O8 1_655 . 3_666 95.0(3) ?
  P2 Fe1 P2 3_666 . 3_766 100.93(13) ?
  P2 Fe1 O5 3_666 . 1_655 164.7(2) ?
  P2 Fe1 O5 3_666 . 3_666 15.3(2) ?
  P2 Fe1 O6 3_666 . . 85.9(3) ?
  P2 Fe1 O6 3_666 . 3_766 94.1(3) ?
  P2 Fe1 O8 3_666 . 1_655 95.0(3) ?
  P2 Fe1 O8 3_666 . 3_666 85.0(3) ?
  P2 Fe1 O5 3_766 . 1_655 86.6(2) ?
  P2 Fe1 O5 3_766 . 3_666 93.4(2) ?
  P2 Fe1 O6 3_766 . . 162.0(2) ?
  P2 Fe1 O6 3_766 . 3_766 18.0(2) ?
  P2 Fe1 O8 3_766 . 1_655 98.9(2) ?
  P2 Fe1 O8 3_766 . 3_666 81.1(2) ?
  O5 Fe1 O5 1_655 . 3_666 180 ?
  O5 Fe1 O6 1_655 . . 83.3(4) ?
  O5 Fe1 O6 1_655 . 3_766 96.7(4) ?
  O5 Fe1 O8 1_655 . 1_655 97.0(4) ?
  O5 Fe1 O8 1_655 . 3_666 83.0(4) ?
  O5 Fe1 O6 3_666 . . 96.7(4) ?
  O5 Fe1 O6 3_666 . 3_766 83.3(4) ?
  O5 Fe1 O8 3_666 . 1_655 83.0(4) ?
  O5 Fe1 O8 3_666 . 3_666 97.0(4) ?
  O6 Fe1 O6 . . 3_766 180 ?
  O6 Fe1 O8 . . 1_655 97.1(3) ?
  O6 Fe1 O8 . . 3_666 82.9(3) ?
  O6 Fe1 O8 3_766 . 1_655 82.9(3) ?
  O6 Fe1 O8 3_766 . 3_666 97.1(3) ?
  O8 Fe1 O8 1_655 . 3_666 180 ?
  Fe1 Mn2 Mn2 2_756 . 4_565 159.71(8) ?
  Fe1 Mn2 Fe3 2_756 . 4_565 67.60(5) ?
  Fe1 Mn2 P1 2_756 . . 110.77(8) ?
  Fe1 Mn2 P1 2_756 . 1_655 107.25(9) ?
  Fe1 Mn2 P2 2_756 . 2_656 66.71(7) ?
  Fe1 Mn2 P2 2_756 . 2_756 63.54(8) ?
  Fe1 Mn2 O1 2_756 . . 133.2(3) ?
  Fe1 Mn2 O3 2_756 . 1_655 129.6(4) ?
  Fe1 Mn2 O5 2_756 . 2_656 45.7(3) ?
  Fe1 Mn2 O6 2_756 . 2_756 44.96(19) ?
  Fe1 Mn2 O8 2_756 . 4_665 47.0(2) ?
  Fe1 Mn2 O9 2_756 . 4_666 119.0(2) ?
  Mn2 Mn2 Fe3 4_565 . 4_565 94.40(6) ?
  Mn2 Mn2 P1 4_565 . . 60.96(7) ?
  Mn2 Mn2 P1 4_565 . 1_655 61.24(7) ?
  Mn2 Mn2 P2 4_565 . 2_656 124.28(10) ?
  Mn2 Mn2 P2 4_565 . 2_756 123.98(9) ?
  Mn2 Mn2 O1 4_565 . . 41.0(3) ?
  Mn2 Mn2 O3 4_565 . 1_655 40.7(4) ?
  Mn2 Mn2 O5 4_565 . 2_656 143.1(3) ?
  Mn2 Mn2 O6 4_565 . 2_756 139.0(2) ?
  Mn2 Mn2 O8 4_565 . 4_665 112.9(2) ?
  Mn2 Mn2 O9 4_565 . 4_666 81.3(2) ?
  Fe3 Mn2 P1 4_565 . . 53.84(9) ?
  Fe3 Mn2 P1 4_565 . 1_655 88.63(12) ?
  Fe3 Mn2 P2 4_565 . 2_656 88.38(10) ?
  Fe3 Mn2 P2 4_565 . 2_756 121.04(9) ?
  Fe3 Mn2 O1 4_565 . . 72.9(3) ?
  Fe3 Mn2 O3 4_565 . 1_655 98.4(4) ?
  Fe3 Mn2 O5 4_565 . 2_656 79.2(2) ?
  Fe3 Mn2 O6 4_565 . 2_756 103.6(2) ?
  Fe3 Mn2 O8 4_565 . 4_665 27.6(2) ?
  Fe3 Mn2 O9 4_565 . 4_666 156.1(3) ?
  P1 Mn2 P1 . . 1_655 105.00(12) ?
  P1 Mn2 P2 . . 2_656 77.37(11) ?
  P1 Mn2 P2 . . 2_756 174.22(9) ?
  P1 Mn2 O1 . . . 22.5(2) ?
  P1 Mn2 O3 . . 1_655 94.6(3) ?
  P1 Mn2 O5 . . 2_656 87.3(2) ?
  P1 Mn2 O6 . . 2_756 155.1(2) ?
  P1 Mn2 O8 . . 4_665 81.4(3) ?
  P1 Mn2 O9 . . 4_666 104.8(3) ?
  P1 Mn2 P2 1_655 . 2_656 173.93(10) ?
  P1 Mn2 P2 1_655 . 2_756 76.62(11) ?
  P1 Mn2 O1 1_655 . . 95.7(4) ?
  P1 Mn2 O3 1_655 . 1_655 22.4(4) ?
  P1 Mn2 O5 1_655 . 2_656 152.9(3) ?
  P1 Mn2 O6 1_655 . 2_756 82.4(3) ?
  P1 Mn2 O8 1_655 . 4_665 81.0(3) ?
  P1 Mn2 O9 1_655 . 4_666 109.2(3) ?
  P2 Mn2 P2 2_656 . 2_756 100.48(10) ?
  P2 Mn2 O1 2_656 . . 88.5(3) ?
  P2 Mn2 O3 2_656 . 1_655 163.6(4) ?
  P2 Mn2 O5 2_656 . 2_656 21.1(3) ?
  P2 Mn2 O6 2_656 . 2_756 93.2(3) ?
  P2 Mn2 O8 2_656 . 4_665 94.0(3) ?
  P2 Mn2 O9 2_656 . 4_666 75.1(2) ?
  P2 Mn2 O1 2_756 . . 163.3(3) ?
  P2 Mn2 O3 2_756 . 1_655 88.8(3) ?
  P2 Mn2 O5 2_756 . 2_656 89.0(2) ?
  P2 Mn2 O6 2_756 . 2_756 19.08(19) ?
  P2 Mn2 O8 2_756 . 4_665 93.4(3) ?
  P2 Mn2 O9 2_756 . 4_666 79.6(2) ?
  O1 Mn2 O3 . . 1_655 79.4(5) ?
  O1 Mn2 O5 . . 2_656 103.6(4) ?
  O1 Mn2 O6 . . 2_756 176.1(4) ?
  O1 Mn2 O8 . . 4_665 100.1(4) ?
  O1 Mn2 O9 . . 4_666 89.2(4) ?
  O3 Mn2 O5 1_655 . 2_656 175.3(5) ?
  O3 Mn2 O6 1_655 . 2_756 99.6(4) ?
  O3 Mn2 O8 1_655 . 4_665 98.9(5) ?
  O3 Mn2 O9 1_655 . 4_666 93.5(4) ?
  O5 Mn2 O6 2_656 . 2_756 77.2(3) ?
  O5 Mn2 O8 2_656 . 4_665 77.1(4) ?
  O5 Mn2 O9 2_656 . 4_666 90.2(3) ?
  O6 Mn2 O8 2_756 . 4_665 76.3(3) ?
  O6 Mn2 O9 2_756 . 4_666 94.7(3) ?
  O8 Mn2 O9 4_665 . 4_666 165.6(3) ?
  Fe1 Fe3 Mn2 . . 4_565 44.36(6) ?
  Fe1 Fe3 Fe3 . . 4_565 129.22(6) ?
  Fe1 Fe3 P1 . . . 92.38(13) ?
  Fe1 Fe3 P2 . . . 55.58(7) ?
  Fe1 Fe3 P2 . . 3_665 93.27(12) ?
  Fe1 Fe3 O2 . . . 87.8(2) ?
  Fe1 Fe3 O4 . . 3_665 92.7(2) ?
  Fe1 Fe3 O7 . . . 70.4(2) ?
  Fe1 Fe3 O8 . . 1_655 25.7(3) ?
  Fe1 Fe3 O9 . . . 154.3(2) ?
  Fe1 Fe3 O10 . . 1_655 120.4(3) ?
  Mn2 Fe3 Fe3 4_565 . 4_565 85.60(5) ?
  Mn2 Fe3 P1 4_565 . . 55.45(11) ?
  Mn2 Fe3 P2 4_565 . . 92.77(8) ?
  Mn2 Fe3 P2 4_565 . 3_665 127.99(11) ?
  Mn2 Fe3 O2 4_565 . . 62.8(2) ?
  Mn2 Fe3 O4 4_565 . 3_665 115.7(3) ?
  Mn2 Fe3 O7 4_565 . . 105.8(2) ?
  Mn2 Fe3 O8 4_565 . 1_655 30.3(3) ?
  Mn2 Fe3 O9 4_565 . . 148.9(3) ?
  Mn2 Fe3 O10 4_565 . 1_655 83.0(3) ?
  Fe3 Fe3 P1 4_565 . . 54.20(8) ?
  Fe3 Fe3 P2 4_565 . . 158.82(10) ?
  Fe3 Fe3 P2 4_565 . 3_665 119.40(9) ?
  Fe3 Fe3 O2 4_565 . . 72.0(2) ?
  Fe3 Fe3 O4 4_565 . 3_665 105.5(2) ?
  Fe3 Fe3 O7 4_565 . . 149.9(3) ?
  Fe3 Fe3 O8 4_565 . 1_655 106.5(2) ?
  Fe3 Fe3 O9 4_565 . . 73.2(2) ?
  Fe3 Fe3 O10 4_565 . 1_655 21.6(4) ?
  P1 Fe3 P2 . . . 108.05(11) ?
  P1 Fe3 P2 . . 3_665 173.48(9) ?
  P1 Fe3 O2 . . . 21.2(2) ?
  P1 Fe3 O4 . . 3_665 155.8(2) ?
  P1 Fe3 O7 . . . 109.4(3) ?
  P1 Fe3 O8 . . 1_655 85.8(3) ?
  P1 Fe3 O9 . . . 93.4(3) ?
  P1 Fe3 O10 . . 1_655 69.9(4) ?
  P2 Fe3 P2 . . 3_665 77.90(9) ?
  P2 Fe3 O2 . . . 88.5(2) ?
  P2 Fe3 O4 . . 3_665 94.3(2) ?
  P2 Fe3 O7 . . . 14.8(2) ?
  P2 Fe3 O8 . . 1_655 81.2(3) ?
  P2 Fe3 O9 . . . 98.9(2) ?
  P2 Fe3 O10 . . 1_655 175.7(3) ?
  P2 Fe3 O2 3_665 . . 162.5(2) ?
  P2 Fe3 O4 3_665 . 3_665 20.4(2) ?
  P2 Fe3 O7 3_665 . . 75.7(3) ?
  P2 Fe3 O8 3_665 . 1_655 98.0(3) ?
  P2 Fe3 O9 3_665 . . 82.8(3) ?
  P2 Fe3 O10 3_665 . 1_655 104.4(4) ?
  O2 Fe3 O4 . . 3_665 177.0(3) ?
  O2 Fe3 O7 . . . 88.3(4) ?
  O2 Fe3 O8 . . 1_655 90.6(4) ?
  O2 Fe3 O9 . . . 88.6(4) ?
  O2 Fe3 O10 . . 1_655 90.0(5) ?
  O4 Fe3 O7 3_665 . . 94.7(4) ?
  O4 Fe3 O8 3_665 . 1_655 88.6(4) ?
  O4 Fe3 O9 3_665 . . 92.1(4) ?
  O4 Fe3 O10 3_665 . 1_655 87.2(5) ?
  O7 Fe3 O8 . . 1_655 95.9(3) ?
  O7 Fe3 O9 . . . 84.1(3) ?
  O7 Fe3 O10 . . 1_655 169.1(4) ?
  O8 Fe3 O9 1_655 . . 179.2(4) ?
  O8 Fe3 O10 1_655 . 1_655 94.9(4) ?
  O9 Fe3 O10 . . 1_655 85.0(4) ?
  Mn2 P1 Mn2 1_455 . . 105.00(10) ?
  Mn2 P1 Mn2 1_455 . 4_465 57.52(11) ?
  Mn2 P1 Mn2 1_455 . 4_565 136.56(16) ?
  Mn2 P1 Fe3 1_455 . . 148.76(15) ?
  Mn2 P1 Fe3 1_455 . 4_565 106.98(8) ?
  Mn2 P1 O1 1_455 . . 114.3(5) ?
  Mn2 P1 O2 1_455 . . 126.4(4) ?
  Mn2 P1 O2 1_455 . 4_565 78.4(4) ?
  Mn2 P1 O3 1_455 . . 30.36(15) ?
  Mn2 P1 Mn2 . . 4_465 136.56(16) ?
  Mn2 P1 Mn2 . . 4_565 58.08(10) ?
  Mn2 P1 Fe3 . . . 103.75(17) ?
  Mn2 P1 Fe3 . . 4_565 70.71(13) ?
  Mn2 P1 O1 . . . 31.2(2) ?
  Mn2 P1 O2 . . . 128.4(5) ?
  Mn2 P1 O2 . . 4_565 79.6(3) ?
  Mn2 P1 O3 . . . 115.8(4) ?
  Mn2 P1 Mn2 4_465 . 4_565 105.00(10) ?
  Mn2 P1 Fe3 4_465 . . 106.98(8) ?
  Mn2 P1 Fe3 4_465 . 4_565 148.76(15) ?
  Mn2 P1 O1 4_465 . . 114.3(5) ?
  Mn2 P1 O2 4_465 . . 78.4(4) ?
  Mn2 P1 O2 4_465 . 4_565 126.4(4) ?
  Mn2 P1 O3 4_465 . . 30.36(15) ?
  Mn2 P1 Fe3 4_565 . . 70.71(13) ?
  Mn2 P1 Fe3 4_565 . 4_565 103.75(17) ?
  Mn2 P1 O1 4_565 . . 31.2(2) ?
  Mn2 P1 O2 4_565 . . 79.6(3) ?
  Mn2 P1 O2 4_565 . 4_565 128.4(5) ?
  Mn2 P1 O3 4_565 . . 115.8(4) ?
  Fe3 P1 Fe3 . . 4_565 71.60(14) ?
  Fe3 P1 O1 . . . 96.7(5) ?
  Fe3 P1 O2 . . . 28.6(4) ?
  Fe3 P1 O2 . . 4_565 95.1(4) ?
  Fe3 P1 O3 . . . 136.8(3) ?
  Fe3 P1 O1 4_565 . . 96.7(5) ?
  Fe3 P1 O2 4_565 . . 95.1(4) ?
  Fe3 P1 O2 4_565 . 4_565 28.6(4) ?
  Fe3 P1 O3 4_565 . . 136.8(3) ?
  O1 P1 O2 . . . 110.5(5) ?
  O1 P1 O2 . . 4_565 110.5(5) ?
  O1 P1 O3 . . . 107.8(7) ?
  O2 P1 O2 . . 4_565 111.5(5) ?
  O2 P1 O3 . . . 108.2(5) ?
  O2 P1 O3 4_565 . . 108.2(5) ?
  Fe1 P2 Fe1 1_455 . . 100.93(13) ?
  Fe1 P2 Mn2 1_455 . 2_646 48.95(7) ?
  Fe1 P2 Mn2 1_455 . 2_746 122.97(12) ?
  Fe1 P2 Fe3 1_455 . . 98.16(8) ?
  Fe1 P2 Fe3 1_455 . 3_665 150.81(11) ?
  Fe1 P2 O4 1_455 . . 124.4(4) ?
  Fe1 P2 O5 1_455 . . 19.8(3) ?
  Fe1 P2 O6 1_455 . . 108.4(4) ?
  Fe1 P2 O7 1_455 . . 94.1(4) ?
  Fe1 P2 Mn2 . . 2_646 121.57(12) ?
  Fe1 P2 Mn2 . . 2_746 49.71(7) ?
  Fe1 P2 Fe3 . . . 68.33(7) ?
  Fe1 P2 Fe3 . . 3_665 105.96(13) ?
  Fe1 P2 O4 . . . 127.3(4) ?
  Fe1 P2 O5 . . . 109.7(3) ?
  Fe1 P2 O6 . . . 23.7(3) ?
  Fe1 P2 O7 . . . 87.7(3) ?
  Mn2 P2 Mn2 2_646 . 2_746 100.48(10) ?
  Mn2 P2 Fe3 2_646 . . 145.43(12) ?
  Mn2 P2 Fe3 2_646 . 3_665 105.63(9) ?
  Mn2 P2 O4 2_646 . . 80.0(4) ?
  Mn2 P2 O5 2_646 . . 29.2(3) ?
  Mn2 P2 O6 2_646 . . 108.9(4) ?
  Mn2 P2 O7 2_646 . . 133.8(4) ?
  Mn2 P2 Fe3 2_746 . . 108.29(11) ?
  Mn2 P2 Fe3 2_746 . 3_665 69.68(12) ?
  Mn2 P2 O4 2_746 . . 81.2(3) ?
  Mn2 P2 O5 2_746 . . 114.4(3) ?
  Mn2 P2 O6 2_746 . . 27.1(3) ?
  Mn2 P2 O7 2_746 . . 125.1(4) ?
  Fe3 P2 Fe3 . . 3_665 102.10(11) ?
  Fe3 P2 O4 . . . 122.4(4) ?
  Fe3 P2 O5 . . . 117.7(3) ?
  Fe3 P2 O6 . . . 89.9(3) ?
  Fe3 P2 O7 . . . 19.4(3) ?
  Fe3 P2 O4 3_665 . . 26.7(4) ?
  Fe3 P2 O5 3_665 . . 133.8(3) ?
  Fe3 P2 O6 3_665 . . 92.6(4) ?
  Fe3 P2 O7 3_665 . . 98.0(4) ?
  O4 P2 O5 . . . 107.3(5) ?
  O4 P2 O6 . . . 108.0(5) ?
  O4 P2 O7 . . . 111.7(5) ?
  O5 P2 O6 . . . 109.0(5) ?
  O5 P2 O7 . . . 111.6(5) ?
  O6 P2 O7 . . . 109.1(4) ?
  Mn2 O1 Mn2 . . 4_565 98.0(5) ?
  Mn2 O1 P1 . . . 126.3(3) ?
  Mn2 O1 P1 4_565 . . 126.3(3) ?
  Fe3 O2 P1 . . . 130.2(6) ?
  Mn2 O3 Mn2 1_455 . 4_465 98.6(7) ?
  Mn2 O3 P1 1_455 . . 127.2(4) ?
  Mn2 O3 P1 4_465 . . 127.2(4) ?
  Fe3 O4 P2 3_665 . . 132.9(6) ?
  Fe1 O5 Mn2 1_455 . 2_646 85.2(4) ?
  Fe1 O5 P2 1_455 . . 145.0(5) ?
  Mn2 O5 P2 2_646 . . 129.7(5) ?
  Fe1 O6 Mn2 . . 2_746 85.7(3) ?
  Fe1 O6 P2 . . . 138.3(4) ?
  Mn2 O6 P2 2_746 . . 133.8(4) ?
  Fe3 O7 P2 . . . 145.8(5) ?
  Fe1 O8 Mn2 1_455 . 4_465 81.6(3) ?
  Fe1 O8 Fe3 1_455 . 1_455 129.2(5) ?
  Mn2 O8 Fe3 4_465 . 1_455 122.0(5) ?
  Mn2 O9 Fe3 4_464 . . 127.2(5) ?
  Fe3 O10 Fe3 1_455 . 4_465 136.7(8) ?

loop_
 _geom_torsion_atom_site_label_1
 _geom_torsion_atom_site_label_2
 _geom_torsion_atom_site_label_3
 _geom_torsion_atom_site_label_4
 _geom_torsion_site_symmetry_1
 _geom_torsion_site_symmetry_2
 _geom_torsion_site_symmetry_3
 _geom_torsion_site_symmetry_4
 _geom_torsion
 _geom_torsion_publ_flag
 ? ? ? ? ? ? ? ? ? ?

loop_
 _geom_hbond_atom_site_label_D
 _geom_hbond_atom_site_label_H
 _geom_hbond_atom_site_label_A
 _geom_hbond_site_symmetry_D
 _geom_hbond_site_symmetry_H
 _geom_hbond_site_symmetry_A
 _geom_hbond_distance_DH
 _geom_hbond_distance_HA
 _geom_hbond_distance_DA
 _geom_hbond_angle_DHA
 _geom_hbond_publ_flag
 ? ? ? ? ? ? ? ? ? ? ?


#=======================================================================

# 11. STRUCTURE-FACTOR LIST

loop_
 _refln_index_h
 _refln_index_k
 _refln_index_l
 _refln_F_squared_calc
 _refln_F_squared_meas
 _refln_F_squared_sigma
 _refln_observed_status
   1   0   0 12679.40 12968.30  1114.55 o
   2   0   0  5536.88  5218.96   317.54 o
   3   0   0  2385.54  2745.14   167.25 o
   4   0   0   464.83   380.38    33.92 o
   1   1   0  3323.09  4446.56   269.99 o
   2   1   0  2787.84  2856.86   174.23 o
   3   1   0  4294.93  5257.53   226.43 o
   4   1   0  1905.57  1457.69    73.82 o
   1   2   0   378.79   467.17    29.26 o
   2   2   0   796.72   875.81    54.20 o
   3   2   0  5820.99  4351.80   375.40 o
   4   2   0   353.89   339.48    15.63 o
   1   3   0  1406.61  1153.12    62.84 o
   2   3   0  1570.09  1572.74    96.43 o
   3   3   0  1506.07  1544.48    94.76 o
   4   3   0   935.66   970.24    42.89 o
   1   4   0  6956.76  6327.19   385.37 o
   2   4   0  1413.25  1728.68   106.73 o
   3   4   0  1971.72  1823.78    92.44 o
   1   5   0  8083.66  5994.36   306.90 o
   2   5   0 12836.20 10998.20   572.24 o
   3   5   0  7675.11  7849.72   478.14 o
   4   5   0  2482.60  1883.63    98.75 o
   5   5   0   208.84   128.01    10.31 o
   2   6   0  8431.48  7463.36   388.03 o
   3   6   0   509.19   404.32    23.61 o
   4   6   0   374.27   345.14    25.27 o
   5   6   0   857.47   841.23    38.24 o
   1   7   0  3839.20  2882.47   180.88 o
   2   7   0  1086.78   693.60    46.88 o
   3   7   0   128.77   119.04    10.97 o
   4   7   0   474.74   468.50    32.59 o
   0   8   0  3672.26  4147.31   253.70 o
   1   8   0  6032.89  4799.34   252.70 o
   2   8   0  6602.18  5211.98   263.67 o
   3   8   0    49.30    43.89     6.98 o
   4   8   0  2225.63  1651.54   101.08 o
   1   9   0  1524.86  1298.42    80.80 o
   2   9   0  5925.63  4356.12   193.85 o
   3   9   0  2246.65  1924.19   120.70 o
   4   9   0  2319.36  1720.37    93.77 o
   0  10   0 21764.50 26291.30  1593.35 o
   1  10   0  2769.93  3229.60   139.98 o
   2  10   0   484.76   519.04    24.94 o
   3  10   0   257.03   278.97    15.30 o
   1  11   0  1720.39  2025.94    88.78 o
   2  11   0   466.89   517.04    28.93 o
   3  11   0  1751.67  2384.38   104.74 o
   4  11   0  1853.60  1589.03    71.16 o
   5  11   0   447.29   355.11    18.95 o
   0  12   0  1117.28  1333.00    83.79 o
   1  12   0  3711.98  4090.78   177.56 o
   2  12   0  2658.47  2603.16   131.67 o
   3  12   0   310.41   367.42    18.95 o
   4  12   0  1831.01  1759.60    90.44 o
   5  12   0    57.25    -8.98    11.31 <
   1  13   0   336.17   406.32    22.94 o
   2  13   0  1422.07  1673.49    74.48 o
   3  13   0  1647.20  1900.92    84.46 o
   4  13   0  1647.97  1757.28    77.81 o
   0  14   0    26.70    39.57     8.31 o
   1  14   0  5563.64  6255.04   269.66 o
   2  14   0  3138.56  4297.27   215.79 o
   3  14   0    38.35    57.52     7.65 o
   4  14   0  1136.73  1135.16    51.54 o
   1  15   0  1013.44  1330.68    59.85 o
   2  15   0  1810.09  2174.90   134.66 o
   3  15   0  1189.43  1145.47    73.48 o
   4  15   0  1478.11  1456.03    76.14 o
   0  16   0   217.81   233.75    19.29 o
   1  16   0   470.05   621.45    29.59 o
   2  16   0   151.85   194.51    11.97 o
   3  16   0   109.94   126.02     9.64 o
   1  17   0   172.27   190.52    11.97 o
   2  17   0   296.42   308.89    18.95 o
   3  17   0   141.40   177.22    11.64 o
   0  18   0    65.66    79.80    10.64 o
   1  18   0  1893.86  2682.30   118.04 o
   2  18   0   133.48   226.43    13.97 o
   3  18   0  1245.61  1328.68    82.79 o
   1  19   0   232.00   318.54    24.61 o
   2  19   0  1256.08  1813.80    80.80 o
   0  20   0  4829.16  7017.14   429.59 o
   1  20   0   451.07   679.30    32.59 o
  -1   0   1  9629.01  9022.79   547.96 o
   1   0   1 11838.40 11214.00   680.97 o
   2   0   1  3735.07  4050.88   247.38 o
   3   0   1    34.08    22.28     7.32 o
   4   0   1   126.67   140.65    12.30 o
   5   0   1  1012.64  1082.63    67.50 o
  -1   1   1  2350.76  1995.68   121.36 o
   0   1   1     9.61    30.26     5.65 o
   1   1   1  8411.90  7455.04   453.20 o
   2   1   1  6374.71  6756.46   409.31 o
   3   1   1  3846.80  4037.91   174.23 o
   4   1   1    53.19    54.53     5.65 o
   5   1   1   919.51  1265.84    55.53 o
  -3   2   1  1574.38  1474.32    90.44 o
  -2   2   1  1021.14   904.41    55.53 o
  -1   2   1   488.26   489.78    30.92 o
   0   2   1     6.48    29.26     8.31 o
   1   2   1 17336.80 19901.00  1209.98 o
   2   2   1   243.79   265.34    19.62 o
   3   2   1  1099.07  1106.57    49.21 o
  -3   3   1  2105.65  2514.05   113.38 o
  -1   3   1  1873.84  1812.80   112.05 o
   0   3   1   877.76   864.17    75.81 o
   1   3   1  1510.52  1421.12    72.49 o
   2   3   1  2116.59  2112.06   105.74 o
   3   3   1   484.24   444.22    29.93 o
   4   3   1   233.27   208.15    14.96 o
   5   3   1   129.17    67.17    13.30 o
  -4   4   1  2696.98  3218.29   206.48 o
  -3   4   1  4920.12  4395.02   219.78 o
  -2   4   1  1175.48  1063.68    46.55 o
  -1   4   1  4936.12  3954.12   210.47 o
   0   4   1  9066.98  9630.61   828.60 o
   1   4   1   288.26   294.60    19.95 o
   2   4   1   237.67   281.30    19.62 o
   3   4   1  1112.62  1228.60    76.81 o
   5   4   1   700.14   593.18    39.90 o
  -4   5   1  2664.23  2465.84   107.40 o
  -3   5   1   125.22   144.64     7.65 o
  -2   5   1     9.68    15.63     2.99 o
  -1   5   1  6052.29  5286.46   276.98 o
   0   5   1  6636.31  7820.13   673.98 o
   1   5   1  8506.75  9303.76   565.59 o
   2   5   1   726.32   830.26    52.54 o
   3   5   1  2359.29  2380.05   146.63 o
   4   5   1   427.28    -2.33     6.65 <
   5   5   1   154.44   110.72     8.98 o
  -4   6   1    51.08    44.56     4.99 o
  -3   6   1  6199.17  6533.01   281.30 o
  -2   6   1  6423.13  7205.33   311.22 o
  -1   6   1  7641.48  5995.02   306.57 o
   0   6   1    65.46    69.83     8.65 o
   1   6   1  3599.97  3788.54   231.42 o
   2   6   1   278.08   269.66    27.27 o
   3   6   1  2427.54  2032.59   126.02 o
   4   6   1   178.96   128.35    11.97 o
   5   6   1   356.60   181.55    22.94 o
  -4   7   1  1423.59  1454.70    77.14 o
  -3   7   1   808.17  1029.10    53.53 o
  -2   7   1    50.92    56.19     4.99 o
  -1   7   1  3898.28  2681.63   165.92 o
   0   7   1  5836.32  6254.38   382.05 o
   1   7   1   342.83   242.06    19.62 o
   2   7   1  1737.76  1809.48    91.77 o
   3   7   1  3731.16  3158.11   202.49 o
  -5   8   1   324.02   341.15    19.62 o
  -4   8   1   798.45   651.37    39.90 o
  -3   8   1  1704.09  1805.49    92.10 o
  -2   8   1   210.66   246.72    14.63 o
  -1   8   1  4278.19  3880.97   201.16 o
   0   8   1   299.52   373.07    18.95 o
   1   8   1   321.10   254.03    16.63 o
   2   8   1  2915.97  3020.79   263.67 o
  -5   9   1   432.66   315.55    22.94 o
  -4   9   1    28.34    12.64     3.66 o
  -3   9   1   542.96   645.72    29.59 o
  -2   9   1   112.37    98.09    10.31 o
   0   9   1   212.31   270.33    31.92 o
   1   9   1  4245.75  3658.19   193.18 o
   2   9   1   565.21   575.23    31.59 o
   3   9   1  2464.44  2534.67   128.35 o
   4   9   1   397.47   454.86    33.58 o
   5   9   1   795.05   519.70   121.36 o
  -5  10   1   283.11   341.48    19.95 o
  -4  10   1   230.49   149.96    11.31 o
  -3  10   1  1067.78  1107.23    49.54 o
  -2  10   1   954.48   974.57    50.87 o
  -1  10   1  3850.29  3915.22   169.91 o
   1  10   1   374.52   287.95    18.62 o
   2  10   1  1055.03   974.57    53.87 o
   3  10   1  1075.16   959.27    63.84 o
   4  10   1    13.78    15.30     5.32 <
   5  10   1  2294.27  2112.72   430.26 o
  -5  11   1   388.61   338.15    17.62 o
  -4  11   1  1055.51  1074.65    56.19 o
  -3  11   1  1083.84  1363.59    60.52 o
  -2  11   1   179.29   251.71    13.63 o
  -1  11   1  1542.18  1730.68    76.14 o
   0  11   1  2397.82  1842.40   120.03 o
   1  11   1  2711.55  2577.89   114.38 o
   2  11   1    55.17    65.50     8.98 o
   3  11   1  2148.46  1810.14    80.80 o
   4  11   1   150.89   154.61    14.30 o
  -4  12   1  3339.84  3936.50   170.24 o
  -3  12   1  1434.51  1861.02    81.80 o
  -2  12   1  3739.12  4696.27   203.49 o
  -1  12   1  4769.72  5046.73   218.12 o
   0  12   1  8238.24  9484.31   408.31 o
   1  12   1   736.56   695.60    38.57 o
   2  12   1  1762.64  1527.85    79.80 o
   3  12   1   261.66   180.55    26.60 o
   4  12   1   741.00   243.06   234.41 <
  -5  13   1   444.62    11.31   301.91 <
  -4  13   1   225.19   237.07    15.30 o
  -3  13   1  1193.87  1396.84    62.18 o
  -2  13   1   655.59   802.66    36.91 o
  -1  13   1   459.32   588.53    28.26 o
   0  13   1    31.31    64.51     7.65 o
   1  13   1  2035.80  1781.55    96.09 o
   2  13   1   915.85   815.96    46.55 o
   3  13   1   606.21   602.49    34.25 o
   4  13   1   700.39   760.10    43.56 o
  -4  14   1   319.41   431.26    42.89 o
  -3  14   1  3929.02  5219.63   226.77 o
  -2  14   1  4858.59  5590.70   484.46 o
  -1  14   1  4115.91  4937.33   213.80 o
   0  14   1   103.91   141.31    10.31 o
   1  14   1   435.12   571.57    40.90 o
   2  14   1   883.43  1101.91    50.87 o
   3  14   1  1831.92  1731.67   110.06 o
   4  14   1   581.76   404.32    31.59 o
  -4  15   1   216.83   142.31    19.62 o
  -3  15   1   166.16   152.29     9.64 o
  -2  15   1    91.66   146.97    13.97 o
  -1  15   1   789.06  1063.68    48.55 o
   0  15   1   288.42   362.10    19.29 o
   1  15   1  1070.59  1565.09    98.75 o
   2  15   1  2028.08  2166.26    96.43 o
   3  15   1   512.27   551.62    27.60 o
   4  15   1   106.43    50.54    11.64 o
  -4  16   1   481.02   560.93    27.60 o
  -3  16   1   278.92   304.90    16.29 o
  -2  16   1  1206.81  1581.38    70.49 o
  -1  16   1   566.34   733.17    34.58 o
   0  16   1   344.44   432.25    25.94 o
   1  16   1   244.02   323.52    17.62 o
   2  16   1  1733.97  2249.71    99.75 o
   3  16   1   775.64   670.66    39.90 o
  -3  17   1   191.53   224.11    13.30 o
  -2  17   1   181.64   215.46    12.97 o
  -1  17   1   130.26   163.92    11.31 o
   0  17   1  3261.09  4487.79   194.51 o
   1  17   1  1081.93  1348.63    60.85 o
   2  17   1  1583.55  2030.59    91.11 o
   3  17   1   553.98   545.64    38.57 o
  -3  18   1  1115.65  1591.36    82.46 o
  -1  18   1  2673.16  3595.02   156.94 o
   0  18   1  1112.20  1612.97    71.82 o
   1  18   1   974.85  1255.86    56.86 o
   2  18   1    48.77    47.55     8.65 o
  -2  19   1    27.65    39.57     7.65 o
  -1  19   1   311.58   398.34    29.26 o
   0  19   1    96.53   169.91    16.63 o
   1  19   1   611.56   912.39    42.56 o
   2  19   1   165.85   197.84    19.29 o
  -1  20   1   347.86   481.80    23.94 o
   0  20   1  1037.22  1330.01    60.18 o
  -2   0   2  6992.95  7182.39   435.91 o
  -1   0   2 13970.40 14530.40   882.13 o
   0   0   2    66.39    58.52    16.63 o
   1   0   2  5605.35  4822.62   293.93 o
   2   0   2  1573.11  1325.02    83.13 o
   3   0   2  4992.50  6172.58   376.73 o
   4   0   2  1795.19  2110.39   185.20 o
   5   0   2   147.95    42.23    13.97 o
  -2   1   2  2637.13  2540.32   109.73 o
  -1   1   2 11789.20  9652.55   586.20 o
   0   1   2 12203.60 13062.00  1122.20 o
   1   1   2  8242.34  8529.03   519.04 o
   2   1   2   894.78   857.52    38.90 o
   3   1   2   642.21   706.57    32.59 o
   4   1   2  1646.96  1111.56    72.82 o
   5   1   2  1094.97    -6.32   163.26 <
  -3   2   2  1188.29  1128.18    69.16 o
  -2   2   2   586.22   590.53    37.24 o
  -1   2   2 16445.00 17706.10  1076.31 o
   0   2   2  1397.75  2092.77   183.54 o
   1   2   2  1296.47   994.52    62.51 o
   2   2   2  9715.37  6146.31   530.34 o
   3   2   2   863.83   812.30    37.24 o
   4   2   2  1061.71   916.38    82.13 o
   5   2   2   445.79   223.11   116.04 <
  -3   3   2  1991.51  1918.54    82.79 o
  -2   3   2  1179.03  1049.71    64.84 o
  -1   3   2  1089.63  1035.75    64.51 o
   0   3   2  1791.82  1631.92   142.31 o
   1   3   2   550.92   527.35    34.58 o
   2   3   2   659.68   550.62    51.87 o
   3   3   2   249.30   201.50    17.29 o
   4   3   2   108.49    16.29    10.31 <
  -4   4   2   916.79   817.62    50.54 o
  -3   4   2  6776.58  6590.87   329.51 o
  -2   4   2  1966.96  2288.28   140.32 o
  -1   4   2   209.07   221.11    15.63 o
   0   4   2  3662.30  3607.99   311.22 o
   1   4   2  7411.07  7714.73   469.49 o
   2   4   2 30128.00 31399.20  1903.91 o
   3   4   2  3562.23  3333.34   289.61 o
   4   4   2  5792.28  5515.89   280.96 o
  -4   5   2  1455.66  1327.02    57.86 o
  -3   5   2   141.96   158.60     8.31 o
  -2   5   2 11251.90 13401.50   814.63 o
  -1   5   2 11805.50 11616.00   705.90 o
   0   5   2  2113.85  1717.71   107.07 o
   1   5   2  2497.92  2622.45   227.76 o
   2   5   2 11860.90 12510.10   760.77 o
   3   5   2  1261.81  1270.16    80.13 o
   4   5   2  2702.26  2031.26   126.35 o
  -5   6   2  1567.95    -0.33     5.65 <
  -4   6   2  2447.16  3125.86   135.33 o
  -3   6   2  8465.39  8654.71   433.92 o
  -2   6   2 10224.90 14017.30   610.47 o
  -1   6   2  4157.06  4512.73   275.64 o
   0   6   2    51.72    90.44     9.98 o
   1   6   2  2619.50  2893.44   177.56 o
   2   6   2  6035.90  5360.94   333.17 o
   3   6   2   365.20   313.88    23.28 o
   4   6   2   691.38   608.48    41.23 o
  -5   7   2    49.30    17.29     4.66 o
  -4   7   2    72.99    51.87     5.99 o
  -3   7   2   683.45   917.71    47.22 o
  -2   7   2   933.41   808.31    54.86 o
  -1   7   2   246.81   331.17    23.28 o
   0   7   2   662.71   796.34    50.87 o
   1   7   2  5900.48  6890.12   594.18 o
   2   7   2   137.37   152.95    13.63 o
   5   7   2   958.87   726.52    34.91 o
  -4   8   2   854.55   941.32    41.90 o
  -3   8   2  2340.77  2768.09   138.99 o
  -2   8   2  6485.46  4759.11   294.60 o
  -1   8   2   426.94   429.59    29.59 o
   0   8   2  5706.18  3598.34   304.24 o
   1   8   2  1191.51  1080.30    68.16 o
   2   8   2   743.06   848.88    44.56 o
   3   8   2  1601.74  1942.48   121.03 o
   5   8   2   348.13   401.66    21.95 o
  -5   9   2   656.30   635.74    34.25 o
  -4   9   2  1024.39    -3.99     4.99 <
  -3   9   2   394.76   404.66    19.29 o
  -2   9   2  5208.93  3183.38   278.30 o
  -1   9   2  5234.22  3977.73   211.47 o
   0   9   2 15015.70 17510.30  1064.34 o
   1   9   2  3539.23  3616.30   181.55 o
   2   9   2   143.41    76.81    13.97 o
   3   9   2   150.21    99.42    16.63 o
  -5  10   2   847.04   895.76    46.55 o
  -3  10   2   785.23   903.41    40.90 o
  -2  10   2   673.93   642.06    29.93 o
  -1  10   2   369.38   302.58    19.62 o
   0  10   2  5022.00  5390.53   329.18 o
   1  10   2  4591.97  4446.89   222.44 o
   2  10   2   638.85   668.66    36.24 o
   3  10   2  7250.98  5143.15   348.46 o
   4  10   2  2030.30  1373.24   128.35 o
  -5  11   2   554.25   335.83    24.27 o
  -4  11   2   812.53   904.08    40.90 o
  -3  11   2   943.98  1111.89    49.88 o
  -2  11   2   429.13   545.97    26.27 o
  -1  11   2  3270.48  2934.00   153.28 o
   0  11   2  7763.82  8137.01   405.65 o
   1  11   2  3945.85  3323.70   179.22 o
   2  11   2    53.55    72.15     8.31 o
   3  11   2   304.80   241.73    20.62 o
   4  11   2   721.23   726.52    69.83 o
  -5  12   2  1573.61  1797.51    79.47 o
  -4  12   2   160.23   185.20    10.97 o
  -3  12   2  1549.00  1755.61    77.14 o
  -2  12   2  2251.73  2605.16   114.05 o
  -1  12   2   798.32   652.70    45.55 o
   0  12   2  5167.93  4843.23   252.04 o
   1  12   2   501.25   562.26    31.26 o
   2  12   2    29.80    47.22     8.31 o
   4  12   2   111.82     5.32     5.99 <
  -5  13   2   114.29     8.31     6.65 <
  -4  13   2     4.93    27.93     5.65 o
  -3  13   2   894.19  1127.85    50.54 o
  -2  13   2  1177.64  1636.25    72.82 o
  -1  13   2  1520.28  1385.21    73.82 o
   0  13   2  4165.83  3993.03   207.15 o
   1  13   2   805.01   731.17    42.23 o
   2  13   2    61.47    54.20     8.98 o
   3  13   2   500.71   443.56    33.58 o
  -4  14   2    90.84   120.37     9.31 o
  -3  14   2  5412.05  6867.84   296.26 o
  -2  14   2  3496.74  4121.37   357.77 o
  -1  14   2   511.23   613.14    43.23 o
   0  14   2     4.26    33.92     6.65 o
   1  14   2   526.42   575.56    28.93 o
   2  14   2   699.22   502.41    38.90 o
   3  14   2  1198.79  1144.47    53.20 o
  -4  15   2     1.85     2.66     3.99 <
  -3  15   2   118.56   129.34     9.31 o
  -2  15   2  1476.59  1790.53   112.39 o
   0  15   2  3146.86  1962.43   176.56 o
   1  15   2   148.76   146.97    13.30 o
   2  15   2  1646.03  1496.59    67.83 o
   3  15   2   208.67   100.75    22.28 o
  -4  16   2    46.60    25.94     5.99 o
  -3  16   2   225.25   269.66    14.63 o
  -2  16   2   133.08   173.57    11.31 o
  -1  16   2   284.08   345.14    21.61 o
   0  16   2  1305.69  1470.99    66.50 o
   1  16   2  1384.09  1298.76    71.16 o
   2  16   2  2431.43  1940.15   103.74 o
   3  16   2  1202.97   865.51    56.86 o
  -3  17   2   217.99   229.76    13.63 o
  -2  17   2   284.33   318.54    17.29 o
  -1  17   2   872.03  1118.21    50.87 o
   1  17   2  1043.01  1278.81    58.19 o
   2  17   2     9.44     8.31     5.99 <
  -3  18   2   792.51  1090.61    57.86 o
  -2  18   2   152.35   246.72    14.63 o
  -1  18   2   828.77  1148.46    52.54 o
   0  18   2    32.89    46.55     7.65 o
   1  18   2   893.00   790.03    60.18 o
   2  18   2   571.21   303.58    70.49 o
  -2  19   2  1105.35  1377.56   170.91 o
  -1  19   2   562.66   858.85    40.23 o
   0  19   2  1106.70  1610.64    72.15 o
   1  19   2   502.87   658.02    46.55 o
  -1  20   2   823.01  1274.48    57.86 o
   0  20   2    13.46    13.63     5.65 <
   1  20   2   259.53   285.29    19.62 o
  -3   0   3  2557.11  2991.19   182.21 o
  -2   0   3  2695.79  2602.83   159.60 o
  -1   0   3  4495.74  3297.43   201.83 o
   0   0   3    73.78     7.32     8.98 <
   1   0   3  9253.62  8607.17   525.35 o
   2   0   3  3118.23  2848.22   175.56 o
   3   0   3  1363.04  1393.19    88.11 o
   4   0   3   126.40    64.84     9.64 o
   5   0   3    49.40    73.15    11.64 o
  -3   1   3  3082.53  3045.72   152.62 o
  -2   1   3  6763.03  6551.97   281.63 o
  -1   1   3  5868.97  4928.35   300.25 o
   1   1   3   552.26   562.26    26.93 o
   2   1   3    28.17    30.92     7.65 o
   3   1   3   526.12   565.59    27.60 o
   4   1   3    40.69    36.91     6.65 o
   5   1   3   252.99   261.68    14.63 o
  -3   2   3  5406.09  6461.86   277.97 o
  -2   2   3   181.53   159.60    12.97 o
  -1   2   3  1006.01   791.02    50.54 o
   1   2   3  1818.80  1706.74   106.40 o
   2   2   3  1485.10  1397.84    62.51 o
   3   2   3  1647.19  1824.77    80.80 o
   4   2   3   143.04    82.79     9.64 o
   5   2   3   872.76   601.16    28.93 o
  -3   3   3  1569.16  1283.46    79.47 o
  -2   3   3  2020.24  2352.12   144.64 o
  -1   3   3   731.04   849.54    54.20 o
   1   3   3   461.24   530.34    36.24 o
   2   3   3  3377.44  3425.78   210.47 o
   3   3   3   447.14   462.84    22.94 o
   4   3   3   627.67   635.08    30.92 o
   5   3   3   603.75   520.37    25.60 o
  -4   4   3  3402.60  3484.63   301.25 o
  -3   4   3  1965.82  1875.32   115.71 o
  -2   4   3   331.47   347.46    18.95 o
  -1   4   3  5502.84  5009.49   305.90 o
   0   4   3  5388.84  6717.55   408.98 o
   1   4   3  3754.15  3734.67   323.52 o
   2   4   3  1875.32  2020.95   125.35 o
   3   4   3  3736.58  3956.45   241.06 o
  -4   5   3  2065.67  2247.39    97.76 o
  -3   5   3  5417.99  6170.25   373.73 o
  -2   5   3   597.25   663.67    42.56 o
  -1   5   3  1916.70  2103.41   183.87 o
   0   5   3  2411.05  2510.73   154.61 o
   1   5   3    78.05    92.44    10.31 o
   2   5   3   275.23   245.05    19.95 o
   3   5   3   929.31   718.54    47.55 o
  -5   6   3  1651.74    -1.00     3.33 <
  -4   6   3    54.52    56.53     5.65 o
  -3   6   3   554.39   373.07    27.60 o
  -2   6   3   241.45   216.13    15.96 o
  -1   6   3  3614.32  3882.30   237.41 o
   0   6   3   229.16   137.66    13.97 o
   1   6   3   772.42   770.41    49.88 o
   2   6   3   462.94   504.74    34.91 o
   3   6   3   939.96   774.40    51.21 o
   4   6   3   147.58   190.52    12.64 o
  -5   7   3    40.37    27.93     7.98 o
  -4   7   3  1414.33  1570.41    79.80 o
  -3   7   3   161.39   124.02    10.31 o
  -2   7   3  1869.17  2193.85   135.66 o
  -1   7   3  6170.39  7513.23   647.72 o
   0   7   3    69.15   155.94    13.97 o
   1   7   3    72.35    96.43    11.31 o
   2   7   3  1060.89  1149.13    72.82 o
   3   7   3  3553.38  2989.53   156.61 o
   4   7   3   114.55     2.00     5.99 <
  -5   8   3   347.39   386.70    18.62 o
  -3   8   3    61.47    35.25     9.31 o
  -2   8   3  2904.92  3274.82   201.16 o
  -1   8   3   879.96   954.28    60.52 o
   0   8   3  9788.65  9752.64   593.52 o
   1   8   3  3028.06  2629.76   161.93 o
   2   8   3  2796.11  3265.51   201.16 o
   3   8   3   179.05   202.16    18.95 o
  -5   9   3   473.09   552.29    25.94 o
  -4   9   3    24.04    15.63     4.66 o
  -3   9   3  1704.64  1293.10    68.50 o
  -2   9   3   563.84   638.07    42.56 o
  -1   9   3  2515.77  2992.86   184.21 o
   0   9   3  1335.65  1512.55    94.76 o
   1   9   3   666.19   692.94    37.24 o
   3   9   3   328.24   388.36    29.26 o
   4   9   3    89.17   111.72    13.97 o
  -5  10   3  1142.48  1172.40    76.81 o
  -4  10   3   271.80   192.19    14.30 o
  -3  10   3   201.45   246.72    13.97 o
  -2  10   3  1138.57  1042.40    58.19 o
  -1  10   3  3274.45  3693.77   227.10 o
   0  10   3    56.55   114.71    11.97 o
   1  10   3  9892.21 10878.20   662.01 o
   2  10   3   140.91   145.64    14.30 o
   3  10   3  1599.02  1709.73    88.11 o
   4  10   3   854.19   905.07    60.18 o
  -5  11   3   461.72   549.29    36.91 o
  -4  11   3   811.10  1089.28    49.21 o
  -3  11   3  1585.76  2138.99    94.43 o
  -2  11   3    47.01    56.86     8.65 o
  -1  11   3  3494.82  3877.98   238.40 o
   0  11   3   367.02   386.70    26.93 o
   1  11   3    21.49    46.88     6.98 o
   2  11   3   169.56   152.29    15.63 o
   3  11   3   225.97   141.31    15.30 o
  -5  12   3  2218.90  2358.11   103.74 o
  -4  12   3  3437.55  4283.30   185.54 o
  -3  12   3   274.17   384.04    19.95 o
  -2  12   3  2238.91  1974.73   104.07 o
  -1  12   3   357.45   435.91    27.27 o
   0  12   3  1349.65  1515.88    78.14 o
   1  12   3   460.62   398.67    27.93 o
   2  12   3   517.30   638.41    62.18 o
   3  12   3    31.19    41.23     6.98 o
  -5  13   3    81.25    75.48     9.31 o
  -4  13   3   186.89   239.73    15.96 o
  -3  13   3  1925.17  2377.39   149.29 o
  -2  13   3   860.30   846.88    57.19 o
  -1  13   3   988.62   752.79    53.53 o
   0  13   3  1190.33  1069.99    59.85 o
   1  13   3    34.86    37.91     9.64 o
   2  13   3  2803.61  2193.85   139.32 o
   3  13   3   372.84   277.31    34.58 o
  -4  14   3   301.74   307.57    33.25 o
  -3  14   3    30.21    48.21     8.31 o
  -2  14   3   950.73   940.98    54.20 o
  -1  14   3   742.12   583.21    43.89 o
   0  14   3  1048.94  1150.46   108.73 o
   1  14   3  2144.07  2072.16   106.07 o
   2  14   3   783.88   854.20    46.55 o
   3  14   3   422.01   204.82    31.59 o
  -4  15   3   197.94   228.76    18.62 o
  -3  15   3   842.34  1182.05    75.48 o
  -2  15   3  2030.85  2611.14   115.38 o
  -1  15   3   168.37   156.61    13.97 o
   0  15   3   291.01   340.48    22.28 o
   1  15   3    19.96    28.60     5.99 o
   2  15   3    32.96    34.25     6.32 o
   3  15   3    54.56    25.27     8.31 o
  -4  16   3   345.84   365.09    18.95 o
  -3  16   3   152.98   166.25    11.31 o
  -2  16   3  1547.41  2289.95   101.75 o
  -1  16   3  1356.26  1210.64    65.84 o
   0  16   3  1329.69  1477.64    79.80 o
   1  16   3  1950.59  1663.18    88.78 o
   2  16   3  3253.72  2455.20   128.01 o
  -3  17   3   194.28   231.09    13.97 o
  -2  17   3  1754.74  2470.50   109.06 o
  -1  17   3  1467.55  1800.83    80.47 o
   0  17   3   113.74    99.42    12.97 o
   1  17   3    48.34    54.20     9.98 o
   2  17   3    39.49    34.58    11.31 o
  -3  18   3  1386.75  1898.26    84.46 o
  -2  18   3    65.05    61.85     9.31 o
  -1  18   3   631.21   790.03    54.53 o
   0  18   3  2442.20  2558.94   135.99 o
   1  18   3   816.54   743.48    42.89 o
  -2  19   3   151.73   183.87    16.96 o
  -1  19   3   356.67   657.36    44.22 o
   0  19   3   870.37  1114.22    51.54 o
   1  19   3   194.88   237.07    23.28 o
  -4   0   4   395.59   324.86    21.28 o
  -3   0   4    24.07    14.63     4.99 <
  -1   0   4 13019.60 13002.20   791.02 o
   1   0   4  1079.31   881.13    57.52 o
   2   0   4   143.96   147.96    15.96 o
   3   0   4  2596.58  2495.77   155.28 o
  -4   1   4  1874.09  1819.45    78.80 o
  -3   1   4  5055.85  5225.28   225.10 o
  -1   1   4   727.91   815.63    37.57 o
   1   1   4  2980.32  2507.74   109.73 o
   2   1   4  1567.68  1559.44    69.49 o
   3   1   4   870.83   669.33    37.91 o
   4   1   4  2229.43  1793.85    79.80 o
  -4   2   4   482.15   424.61    19.95 o
  -3   2   4  1180.54  1050.04    46.55 o
  -1   2   4  2149.03  2228.77   136.99 o
   1   2   4  2513.15  2557.28   112.05 o
   2   2   4    71.99    86.78     9.31 o
   3   2   4  1791.15  1826.10    81.13 o
   4   2   4   202.97   279.97    15.96 o
  -4   3   4  1252.86  1190.69    62.51 o
  -3   3   4   616.36   571.57    26.93 o
  -2   3   4   924.84   906.40    57.52 o
  -1   3   4   408.87   418.95    40.23 o
   0   3   4   651.99   866.17    56.86 o
   1   3   4  2220.03  2135.67   133.00 o
   2   3   4   804.14   902.41    41.90 o
   3   3   4    77.75    36.91     7.65 o
   4   3   4   579.41   537.99    26.93 o
  -4   4   4  1728.08  1638.24    72.15 o
  -3   4   4  1524.11  1512.22   133.33 o
  -2   4   4 27067.70 23990.40  1455.70 o
  -1   4   4  5264.88  5449.05   470.16 o
   0   4   4 14180.30 13851.40   842.23 o
   1   4   4  3960.81  3829.43   234.75 o
   2   4   4  1746.66  1846.39   115.05 o
  -4   5   4  2501.70  2398.01   148.96 o
  -3   5   4  3092.87  3593.02   220.45 o
  -2   5   4 14620.90 16034.30  1377.56 o
  -1   5   4    84.53   111.06    12.64 o
   0   5   4  1972.66  1851.04   114.71 o
   1   5   4  2585.15  2238.41   138.32 o
   2   5   4  6977.18  6616.47   402.66 o
   3   5   4  4543.28    -7.65    10.31 <
   4   5   4   349.51   352.79    22.28 o
  -3   6   4  2427.20  2809.98   244.72 o
  -2   6   4  4864.98  4776.73   291.61 o
  -1   6   4   831.99   837.24    53.87 o
   0   6   4  1247.93  1226.94    77.14 o
   1   6   4   813.49   910.39    58.85 o
   2   6   4   139.41   171.24    17.96 o
  -5   7   4    65.66    35.91     6.98 o
  -3   7   4  2892.90  3016.46   185.87 o
  -2   7   4   141.97   121.03    11.64 o
  -1   7   4    52.90    73.15     8.98 o
   0   7   4    31.09    50.54     9.31 o
   1   7   4  6506.94  6941.99   423.28 o
   2   7   4   588.03   569.91    38.90 o
   3   7   4   569.52   588.86    42.23 o
   4   7   4   259.06   145.30    12.97 o
  -5   8   4   431.11   394.35    19.29 o
  -3   8   4  1058.01   931.34    60.18 o
  -2   8   4   835.60   987.20    63.18 o
  -1   8   4  2155.23  2072.16   128.68 o
   0   8   4     7.91    12.30     5.32 <
   1   8   4   784.49   966.59    62.84 o
   2   8   4  1982.44  2201.83   194.18 o
  -5   9   4   470.41   379.72    29.59 o
  -4   9   4  2557.79  2052.54   118.04 o
  -2   9   4   109.32   128.01    13.63 o
  -1   9   4   830.54   911.39    58.52 o
   0   9   4   410.26   445.89    31.26 o
   1   9   4  2729.98  2750.79   169.91 o
   2   9   4  4414.74  4652.71   284.95 o
   3   9   4   413.69   454.53    33.92 o
  -4  10   4  2098.25  2416.63   106.40 o
  -3  10   4   956.41  1151.12    74.81 o
  -2  10   4   662.56   716.88    47.22 o
  -1  10   4 12772.20 13621.00   828.60 o
   0  10   4  8426.26  9709.08   591.85 o
   1  10   4  1441.45  1246.22    79.47 o
   2  10   4  1997.84  2487.12   219.78 o
   3  10   4   154.44   150.62    16.29 o
  -5  11   4   448.40   381.38    23.94 o
  -4  11   4  1807.32  2088.78    92.77 o
  -3  11   4  2515.98  2045.89   109.73 o
  -2  11   4    65.82    75.48    11.31 o
  -1  11   4    24.71    38.57     5.65 o
   0  11   4   825.51  1038.74    67.50 o
   1  11   4   378.80   245.39    28.60 o
   2  11   4  1921.31  1110.89   102.08 o
  -5  12   4   214.48   169.24    11.31 o
  -4  12   4  1978.90  2291.61   101.08 o
  -3  12   4   241.07   213.13    20.28 o
  -2  12   4    32.62    23.61     5.32 o
  -1  12   4   527.56   568.58    38.57 o
   0  12   4     3.79    12.64     5.65 <
   1  12   4    74.88    83.79    10.31 o
   2  12   4  1537.53   986.20    91.77 o
   3  12   4   199.81   158.94    17.29 o
  -4  13   4  2046.62  2694.93   118.37 o
  -2  13   4    85.30    59.19     9.31 o
  -1  13   4    33.82    29.59     9.31 o
   0  13   4   126.50   201.50    14.63 o
   1  13   4   908.85   831.92    55.20 o
   3  13   4   310.28   160.60    17.29 o
  -4  14   4  1240.91  1506.90    67.83 o
  -3  14   4  1309.20   901.08    60.18 o
  -2  14   4   565.88   549.96    33.92 o
  -1  14   4  1516.63  1356.28    74.81 o
   0  14   4   537.85   627.10    34.91 o
   1  14   4   433.74   537.32    37.91 o
   2  14   4   225.02   228.10    19.62 o
  -4  15   4  1572.80  2038.91    90.44 o
  -3  15   4   550.67   620.12    30.59 o
  -2  15   4  1995.81  1900.92   100.08 o
  -1  15   4    28.00    25.60     4.99 o
   0  15   4   191.67   175.56    14.30 o
   1  15   4   316.41   295.93    32.92 o
  -3  16   4   635.67   707.57    35.25 o
  -2  16   4  2193.73  1427.77    93.43 o
  -1  16   4  1809.02  1610.98    87.12 o
   0  16   4  1039.65  1056.36    56.19 o
   1  16   4   861.12   821.28    45.55 o
   2  16   4   810.67   773.40    43.23 o
  -3  17   4   390.63   237.74    35.91 o
  -2  17   4     8.78    13.30     6.65 <
  -1  17   4    61.10    71.49    12.30 o
   0  17   4   253.83   277.64    16.63 o
   1  17   4  1416.20  1364.59    74.48 o
  -2  18   4   611.02   643.06    46.55 o
  -1  18   4   960.37   595.84    61.18 o
   0  18   4   604.15   530.34    32.59 o
  -1  19   4   248.69   255.70    18.62 o
  -5   0   5  2509.63  5159.44   454.86 o
  -4   0   5   169.48   178.89    14.63 o
  -3   0   5  3525.21  3593.02   220.78 o
  -2   0   5  3217.19  3263.51   200.17 o
  -1   0   5  1113.89  1103.58    70.49 o
   1   0   5   991.89  1041.73    67.83 o
   3   0   5   814.46  1067.00    69.16 o
  -5   1   5   194.18   151.29    15.63 o
  -4   1   5    71.46    67.83     6.98 o
  -3   1   5   697.31   754.45    35.25 o
  -2   1   5    26.18    38.57     8.98 o
  -1   1   5  2110.94  1701.42    75.48 o
   0   1   5   873.40  1024.77    67.17 o
   1   1   5  1623.42  1499.59    67.50 o
   3   1   5   223.70   240.40    14.30 o
  -5   2   5  1072.21   972.90    87.45 o
  -3   2   5   649.91   634.41    58.19 o
  -2   2   5  1816.77  1926.52    85.12 o
  -1   2   5  2211.94  2129.35    93.43 o
   0   2   5   283.31   322.86    26.60 o
   1   2   5  2290.02  2237.08    98.75 o
   2   2   5    88.12    24.94     7.98 o
   3   2   5    32.57    11.31     5.32 <
  -4   3   5   236.66   206.48    17.62 o
  -3   3   5   179.71   203.16    17.62 o
  -2   3   5  2882.56  2734.83   168.58 o
  -1   3   5  1665.37  1456.36    91.44 o
   0   3   5  1518.46  1845.06   116.04 o
   1   3   5   651.87   618.12    30.26 o
   2   3   5    84.70    34.58     7.32 o
   3   3   5    43.46    35.25     8.31 o
  -4   4   5  1065.82   989.53    63.51 o
  -3   4   5  2573.63  2189.20   135.66 o
  -2   4   5  1800.47  1939.49   120.37 o
  -1   4   5  3042.99  2833.59   174.56 o
   0   4   5   308.89   298.59    23.28 o
   1   4   5   625.44   613.14    42.23 o
   2   4   5  1358.15  1341.65    60.52 o
  -4   5   5   435.81   265.34    28.60 o
  -3   5   5  1144.01  1129.18    71.49 o
  -2   5   5   201.87   177.89    15.96 o
  -1   5   5  1912.58  1644.23   102.74 o
   0   5   5   942.64   964.92    62.51 o
   1   5   5  4187.64  3669.17   224.11 o
   3   5   5  3146.44  3274.49   143.31 o
  -5   6   5  1094.79   793.35    74.81 o
  -3   6   5   372.89   349.46    25.94 o
  -2   6   5   473.22   482.13    32.92 o
  -1   6   5   885.04  1089.28    69.49 o
   0   6   5   223.79   245.39    20.28 o
   1   6   5     3.07     2.99     7.98 <
   2   6   5   374.32   240.40    20.95 o
  -4   7   5   303.15   253.04    28.93 o
  -3   7   5   260.80   157.94    20.28 o
  -2   7   5  1020.71  1103.58    70.49 o
  -1   7   5  7067.45  7604.67   463.84 o
   0   7   5   132.41   185.54    17.62 o
   1   7   5   778.99   742.15    49.54 o
   3   7   5    32.62     8.31     5.65 <
  -5   8   5   291.76   174.90    14.30 o
  -4   8   5  2451.32  1984.04   125.69 o
  -3   8   5  2239.35  2332.84   144.97 o
  -2   8   5  2765.07  3010.48   185.54 o
  -1   8   5   691.18   872.16    57.19 o
   0   8   5  1037.96  1200.00   109.06 o
   1   8   5   415.20   330.17    33.92 o
   2   8   5   463.34   481.80    34.91 o
   3   8   5   687.94   806.98    53.87 o
  -5   9   5   108.33    63.51     8.31 o
  -4   9   5   558.67   564.92    56.19 o
  -3   9   5   166.90   205.82    18.62 o
  -2   9   5   154.38   146.63    14.96 o
  -1   9   5  2035.73  1808.15   159.60 o
   0   9   5   348.39   504.74    35.25 o
   1   9   5  1894.93  1979.72   124.02 o
   2   9   5   176.98    31.59    13.30 <
   3   9   5    38.68     5.99     6.98 <
  -5  10   5  2004.36  2032.92   106.07 o
  -4  10   5    18.20    21.61     6.65 o
  -3  10   5  5838.41  6075.49   371.07 o
  -2  10   5   180.05   195.18    24.27 o
  -1  10   5  1067.92  1159.77    73.82 o
   1  10   5   396.72   502.74    35.58 o
   2  10   5   729.95   726.52    49.21 o
   3  10   5   303.19     1.00     5.65 <
  -5  11   5   513.07   448.55    28.93 o
  -4  11   5   194.31   134.33    15.96 o
  -3  11   5   338.00   214.80    19.62 o
  -2  11   5   119.68    94.43    12.64 o
  -1  11   5   289.90   336.16    35.91 o
   0  11   5  2720.57  3231.93   199.17 o
   1  11   5   625.90   824.94    55.20 o
   2  11   5   266.37   250.04    23.28 o
  -5  12   5    41.15    32.59     6.98 o
  -3  12   5   184.05   121.70    23.94 o
  -2  12   5   704.18   707.23    47.88 o
  -1  12   5   105.49   110.72    12.30 o
   0  12   5   578.75   769.41    51.21 o
   1  12   5    53.59    30.26     7.32 o
  -4  13   5   983.58   932.01    60.52 o
  -3  13   5   534.79   514.71    38.24 o
  -2  13   5  2338.25  2486.79   154.61 o
  -1  13   5   670.80   754.12    41.56 o
   0  13   5   240.26   254.03    20.95 o
   2  13   5   668.62   400.67    43.23 o
  -4  14   5   469.60   527.02    36.91 o
  -3  14   5  1656.66  1049.38    72.82 o
  -2  14   5   876.69   940.32    62.18 o
  -1  14   5   585.38   701.91    47.55 o
   0  14   5   521.06   595.18    41.23 o
   1  14   5    80.84    82.46    13.97 o
  -3  15   5   201.78   144.31    17.29 o
  -2  15   5    23.24    35.25     6.98 o
  -1  15   5   251.51   224.44    16.29 o
   0  15   5   244.91   270.33    29.26 o
   1  15   5  1161.38  1076.98    70.49 o
  -3  16   5  1298.44  1199.67    81.80 o
  -2  16   5  3206.76  3062.35   191.19 o
  -1  16   5  1020.34  1078.64    49.88 o
   0  16   5  1024.47   815.96    55.86 o
   1  16   5    38.20    40.23     6.65 o
  -2  17   5    53.05    37.24     8.98 o
  -1  17   5  1793.39  2111.06   108.73 o
   0  17   5   166.42   140.65    22.61 o
  -5   0   6  1417.79  1547.14    96.43 o
  -3   0   6  1838.92  1947.47   121.70 o
  -2   0   6   181.80   215.46    20.28 o
  -1   0   6  1223.84  1502.25    95.43 o
   2   0   6 11486.50 10897.10   663.34 o
   3   0   6   767.63     5.32    15.30 <
  -5   1   6  1272.19   828.60    74.48 o
  -3   1   6   736.04   840.90    39.24 o
  -2   1   6  1629.35  1748.63    77.81 o
  -1   1   6  2188.46  2451.88   108.06 o
   1   1   6   156.66   164.92    17.96 o
   2   1   6   417.86   564.59    28.93 o
   3   1   6   615.36   -10.31     6.65 <
  -4   2   6  1338.77  1463.01    92.10 o
  -3   2   6  1709.00  2115.38    93.43 o
  -2   2   6    61.83    88.11    10.64 o
  -1   2   6  2392.38  2553.95   111.72 o
   1   2   6   145.04   149.63    17.96 o
   2   2   6    14.05     5.32     5.32 <
   3   2   6    22.99     1.66     4.99 <
  -5   3   6   173.94    75.15    10.97 o
  -4   3   6    76.00     5.65     4.99 <
  -3   3   6   572.29   684.96    32.92 o
  -2   3   6  1063.79  1273.15    57.52 o
  -1   3   6   766.41   788.03    37.57 o
   0   3   6  1088.82    -2.99     5.32 <
   1   3   6   129.28   122.69    11.31 o
   2   3   6   144.52    93.10    10.31 o
   3   3   6   364.55   357.77    19.95 o
  -5   4   6   974.96   590.53    56.86 o
  -4   4   6  6646.88  6767.10   583.88 o
  -3   4   6  4999.91  5934.18   257.36 o
  -2   4   6  2098.55  2544.31   111.72 o
  -1   4   6   478.72   485.79    35.25 o
   0   4   6   593.49   628.43    43.23 o
   1   4   6  1445.42  1519.87    68.83 o
  -4   5   6  2018.07  1582.71    70.49 o
  -3   5   6   857.75   730.84    48.55 o
  -2   5   6  6712.87  6791.04   414.63 o
  -1   5   6  5513.46  4984.88   432.25 o
   0   5   6   182.75   179.55    19.62 o
   1   5   6  2665.19  2240.74    98.75 o
   3   5   6  1229.82    -1.00     5.32 <
  -4   6   6   878.61   860.52    46.22 o
  -3   6   6   728.51   711.56    47.88 o
  -2   6   6   143.70   168.58    16.96 o
  -1   6   6     2.72     9.98    11.31 <
   0   6   6  1984.32  2159.61   135.00 o
   1   6   6  2831.64  2445.89   128.01 o
  -4   7   6   137.13   106.73    24.61 o
  -3   7   6  3487.67  3773.57   231.75 o
  -2   7   6   781.15   823.28    77.47 o
  -1   7   6   679.74   656.03    44.22 o
   0   7   6   520.30   628.76    31.26 o
   1   7   6   124.81    86.12    10.64 o
   2   7   6   130.79    68.83    11.97 o
  -5   8   6   253.57   111.72    22.94 o
  -4   8   6    83.09    59.52    11.64 o
  -3   8   6   204.59   212.47    28.93 o
  -2   8   6  1628.15  1680.80   105.74 o
  -1   8   6   470.68   403.99    40.23 o
   0   8   6   490.27   516.71    36.58 o
   1   8   6  1302.08   868.16    84.12 o
   2   8   6  1145.50   661.02    63.51 o
  -4   9   6   281.22   278.97    32.92 o
  -3   9   6   439.19   465.50    33.58 o
  -2   9   6  4263.86  4601.84   399.34 o
  -1   9   6  2062.38  2033.92   127.02 o
   0   9   6  5787.11  6606.50   403.99 o
   1   9   6   439.21   445.22    32.92 o
   2   9   6   158.12    82.46    15.96 o
  -5  10   6  2798.79  2400.67  1050.04 <
  -4  10   6  2167.98  1246.55   117.37 o
  -3  10   6  2143.22  2146.31   190.19 o
  -2  10   6  2488.32  3167.42   277.64 o
  -1  10   6   335.04   452.54    32.59 o
   0  10   6   335.62   321.86    25.60 o
   1  10   6   514.81   439.57    32.59 o
  -3  11   6   220.41   189.86    26.93 o
  -2  11   6  1997.05  2246.72   140.65 o
  -1  11   6   711.03   937.33    61.51 o
   0  11   6  1742.58  2094.10   131.01 o
   1  11   6   261.31   170.57    18.95 o
   2  11   6   282.24   151.29    16.63 o
  -4  12   6    81.48    53.53    12.30 o
  -3  12   6    35.78    33.58     6.98 o
  -2  12   6  1602.68  1845.39   116.04 o
  -1  12   6    69.12    74.15    10.97 o
  -4  13   6    77.34    87.78    22.61 o
  -3  13   6   391.44   404.32    31.26 o
  -2  13   6   307.61   241.73    30.92 o
  -1  13   6   888.49   889.45    58.19 o
   1  13   6   123.01    68.83    14.63 o
  -3  14   6   420.02   438.90    44.89 o
  -2  14   6   208.01   233.42    27.93 o
  -1  14   6   110.02   150.62    12.30 o
   0  14   6  1738.73  1345.31   123.36 o
  -3  15   6    39.66    22.61     8.98 <
  -2  15   6  2796.79  2414.97   151.29 o
  -1  15   6  1416.27  1492.27    95.43 o
   0  15   6    21.31    16.63     6.65 <
  -2  16   6   939.92   937.33    50.87 o
  -1  16   6    53.32    60.18     8.31 o
  -5   0   7   130.46    68.83    10.64 o
  -4   0   7   140.10   106.73    14.63 o
  -3   0   7  2052.70  1858.03   116.71 o
  -2   0   7    76.28    24.27    17.62 <
  -1   0   7  2112.97  1229.59   113.05 o
   0   0   7  3399.77  3483.96   215.46 o
   1   0   7  2101.43  1831.42   115.05 o
   2   0   7   139.21     2.00     7.32 <
  -4   1   7    53.40    48.88     8.31 o
  -3   1   7   674.57   634.08    30.92 o
  -2   1   7   421.08   370.41    20.62 o
   0   1   7   287.89   270.99    17.62 o
   1   1   7   196.03   133.00    13.63 o
  -5   2   7   436.40   344.47    17.62 o
  -4   2   7   132.09   142.31    11.64 o
  -3   2   7  1915.15  2306.90   102.08 o
  -2   2   7    62.11    31.92     8.31 o
  -1   2   7   197.35   255.70    16.96 o
   0   2   7   953.37   934.33    43.56 o
   1   2   7    79.76    40.57     9.98 o
  -4   3   7   690.12   758.77    35.91 o
  -3   3   7    54.80    13.63     7.32 <
  -2   3   7    60.61    34.91     9.98 o
  -1   3   7   179.30   201.16    14.30 o
   0   3   7   536.17   527.02    27.27 o
   1   3   7  1745.64  1298.42    59.19 o
   2   3   7    48.67    -1.66     8.65 <
  -4   4   7   342.05   232.09    22.94 o
  -2   4   7  1205.79  1350.96    89.44 o
  -1   4   7  1223.57  1104.57    50.87 o
   0   4   7   353.55   360.10    27.93 o
   1   4   7   646.38   604.16    29.93 o
   2   4   7   330.23   202.83    20.28 o
  -4   5   7   419.52   303.24    25.60 o
  -3   5   7  3185.44  2767.75   171.24 o
  -2   5   7   674.66   952.62    63.18 o
  -1   5   7  2512.42  2572.24   113.38 o
   0   5   7    33.64    15.96     9.31 <
   1   5   7   302.48   200.17    16.63 o
  -5   6   7   299.36    22.61    82.79 <
  -4   6   7   186.10   155.28    20.28 o
  -2   6   7   384.03   418.62    31.26 o
  -1   6   7  2143.09  2218.79   138.65 o
   0   6   7   705.45   649.04    44.89 o
  -4   7   7    81.46     8.31     6.65 <
  -3   7   7   649.43   567.58    40.23 o
  -2   7   7  1081.58   723.86    68.83 o
  -1   7   7   158.46   156.94    16.96 o
   0   7   7   163.63   191.19    20.62 o
   1   7   7    45.44    10.64     6.32 <
  -5   8   7   479.03    82.46   894.43 <
  -4   8   7   479.94   432.92    30.92 o
  -3   8   7   425.92   239.07    27.93 o
  -2   8   7   518.25   608.15    42.23 o
  -4   9   7   124.04    92.10    15.30 o
  -3   9   7   449.70   452.87    33.25 o
  -2   9   7   141.60   136.66    14.96 o
  -1   9   7   603.52   620.12    42.56 o
   0   9   7   286.35   306.57    37.24 o
  -4  10   7   971.16   951.96    62.84 o
  -3  10   7   188.33   219.12    20.62 o
  -2  10   7   825.64   851.87    56.53 o
  -1  10   7   589.80   588.53    40.90 o
   0  10   7    34.14    33.92    10.64 o
  -4  11   7  1277.58   679.97    67.50 o
  -2  11   7   292.79   365.75    29.26 o
  -1  11   7   224.08   291.61    36.58 o
  -3  12   7   233.39   219.12    21.28 o
  -2  12   7  1952.79  1943.48   122.69 o
  -1  12   7  1120.03  1002.16    94.76 o
   0  12   7  1054.71   991.86    64.84 o
  -3  13   7   329.14   207.48    30.59 o
  -2  13   7   793.22   665.34    64.84 o
  -2  14   7   141.26    85.79    22.94 o
  -5   0   8    61.69    72.82    12.30 o
  -3   0   8  1138.79  1486.95    94.43 o
  -2   0   8 11385.20 11433.40   696.59 o
  -1   0   8  2945.25  3216.30   199.17 o
  -5   1   8   352.34   247.05    17.29 o
  -4   1   8  2552.60  2948.30   182.54 o
  -3   1   8   309.08   428.60    23.28 o
  -1   1   8   273.22   372.74    21.61 o
  -5   2   8   941.80  1035.41    68.16 o
  -4   2   8   278.16   544.64    38.24 o
  -3   2   8    24.01    17.29     6.98 <
  -2   2   8    19.37    31.26     9.31 o
  -1   2   8    97.43    77.81    10.97 o
   0   2   8     8.25    -4.66     6.32 <
   1   2   8   238.86    12.97    13.30 <
  -4   3   8   690.91   743.48    40.90 o
  -3   3   8    43.53    47.22     9.98 o
  -2   3   8   147.26   158.60    13.30 o
  -1   3   8  1439.99  1390.53    63.18 o
   0   3   8  2469.62  2357.44   104.41 o
  -4   4   8   307.26    -1.00     7.98 <
  -3   4   8   311.24   326.52    19.62 o
  -2   4   8  1315.21  1260.85    57.52 o
  -1   4   8   878.48   944.64    44.22 o
   0   4   8    66.65    60.85     9.31 o
  -4   5   8   469.01   512.39    26.60 o
  -3   5   8  4052.21  4986.88   216.79 o
  -2   5   8   204.07    84.46    13.30 o
  -1   5   8   407.30   376.73    20.95 o
   0   5   8   294.80   163.26    18.95 o
  -3   6   8   812.97   817.96    39.24 o
  -2   6   8  3318.31  3296.43   144.64 o
   0   6   8  1543.25  1342.98    85.79 o
  -4   7   8   240.89   169.24    16.63 o
  -3   7   8    28.68    16.63     7.98 <
  -2   7   8   169.11   120.37    14.30 o
  -1   7   8    41.34    21.95     9.64 <
   0   7   8  1881.99  1899.26   119.70 o
  -4   8   8   231.85    -8.31    13.63 <
  -3   8   8   939.17  1258.52    57.52 o
  -3   9   8    37.45    15.96     7.98 <
  -2   9   8   192.22    79.80    17.29 o
  -1   9   8   123.97    17.29     9.98 <
  -1  10   8   445.84   268.00    31.92 o
  -2  11   8   338.39   203.49    26.27 o
  -2   0   9   106.73    15.30    15.63 <
  -2   1   9   255.71   170.57    25.94 o
  -3   2   9    19.72    10.31     8.65 <
  -2   2   9   246.91   185.20    19.62 o
  -1   2   9   223.78    67.83    16.29 o
  -2   3   9    34.17     1.00     8.65 <
  -1   3   9   227.16   204.16    20.28 o
  -3   4   9   496.22   287.28    24.27 o
  -2   4   9   386.10   426.27    22.94 o
  -1   4   9   276.53   206.82    14.63 o
  -2   5   9   244.61   188.20    16.63 o

loop_
 _twin_refln_datum_id
 _twin_refln_individual_id
 _twin_refln_index_h
 _twin_refln_index_k
 _twin_refln_index_l
 _twin_refln_F_squared_calc
 _twin_refln_F_squared_meas
 _twin_refln_F_squared_sigma
 _twin_refln_include_status
 ? ? ? ? ? ? ? ? ?
